# Supplementary material for: Dermal PapillaCell-Derived Exosomes Regulate Hair Follicle Stem Cell Proliferation via LEF1
Source: MDPI journal article supplement (doi:10.3390/ijms24043961), 2023-02-16
Supplement: s1 [file s1]

**Table S1. Differentially expressed genes between HFSC+Exos and HFSC-Control groups.**

| Gene ID              | foldChange<br>(Exos/HFSC) | log2FoldChange | Gene<br>symbol | Up/down-r<br>egulated |
|----------------------|---------------------------|----------------|----------------|-----------------------|
| ENSOCUG00000006482   | 191.6352348               | 7.582219034    | IFI44          | Up                    |
| ENSOCUG00000007488   | 46.46360995               | 5.538029342    | SUSD2          | Up                    |
| ENSOCUG00000005445   | 39.39924772               | 5.300096178    | -              | Up                    |
| ENSOCUG000000021037  | 173.9861801               | 7.442828906    | -              | Up                    |
| ENSOCUG000000021924  | 77.21583789               | 6.270824887    | -              | Up                    |
| ENSOCUG000000012233  | 34.4990751                | 5.10848578     | GGT5           | Up                    |
| ENSOCUG000000008656  | 38.29247794               | 5.258989116    | -              | Up                    |
| ENSOCUG000000024378  | 51.60283043               | 5.689378295    | IFI44L         | Up                    |
| ENSOCUG000000023263  | 31.99449602               | 4.999751836    | NDUFA4L2       | Up                    |
| ENSOCUG000000006355  | 58.64226752               | 5.873868984    | DDX60          | Up                    |
| ENSOCUG000000034782  | 339.597127                | 8.407680443    | OAS1           | Up                    |
| ENSOCUG000000004501  | 84.34212313               | 6.398181434    | -              | Up                    |
| ENSOCUG000000000968  | 21.22990012               | 4.408025679    | DES            | Up                    |
| ENSOCUG000000039234  | 19.09950113               | 4.255463051    | -              | Up                    |
| ENSOCUG000000006146  | 21.77831529               | 4.444820451    | PAX7           | Up                    |
| ENSOCUG000000007472  | 17.69885299               | 4.145583961    | -              | Up                    |
| ENSOCUG000000000416  | 21.29012854               | 4.412112755    | ARMCX2         | Up                    |
| ENSOCUG0000000004197 | 78.47647824               | 6.294188395    | -              | Up                    |
| ENSOCUG000000011128  | 25.81995914               | 4.690414812    | GLI1           | Up                    |
| ENSOCUG0000000009797 | 16.67116275               | 4.059282825    | ABCA4          | Up                    |
| ENSOCUG000000012591  | 16.59064286               | 4.052297884    | UCP2           | Up                    |
| ENSOCUG000000002998  | 17.52695354               | 4.13150335     | PKDCC          | Up                    |
| ENSOCUG000000021735  | 14.80654335               | 3.888162971    | -              | Up                    |
| ENSOCUG000000000560  | 17.65625484               | 4.142107453    | HEYL           | Up                    |
| ENSOCUG000000014988  | 14.17842981               | 3.825625865    | COL3A1         | Up                    |
| ENSOCUG000000014931  | 35.80609546               | 5.162133301    | -              | Up                    |
| ENSOCUG000000007680  | 29.01902202               | 4.858926994    | -              | Up                    |
| ENSOCUG000000008236  | 13.95193948               | 3.802393782    | LPL            | Up                    |
| ENSOCUG000000014125  | 17.33126373               | 4.115304949    | PGM5           | Up                    |
| ENSOCUG000000015049  | 13.15750636               | 3.717814187    | DTX4           | Up                    |
| ENSOCUG000000010772  | 14.838003                 | 3.891225032    | DCHS2          | Up                    |
| ENSOCUG00000001412   | 13.57199389               | 3.762560781    | IGFBP6         | Up                    |
| ENSOCUG000000014633  | 12.86721097               | 3.685627472    | PKNOX2         | Up                    |
| ENSOCUG000000006595  | 30.65438284               | 4.938021454    | UBA7           | Up                    |
| ENSOCUG000000022666  | 11.81202626               | 3.562184564    | -              | Up                    |
| ENSOCUG000000000312  | 13.68196474               | 3.774203512    | IGDCC4         | Up                    |
| ENSOCUG000000008557  | 20.19496097               | 4.335923453    | ADCY2          | Up                    |
| ENSOCUG000000013498  | 12.41719947               | 3.634267924    | ADAMTS4        | Up                    |
| ENSOCUG000000002473  | 11.7172698                | 3.550564547    | OLFML2A        | Up                    |
| ENSOCUG000000011683  | 14.04982537               | 3.812480294    | ANK1           | Up                    |
| ENSOCUG000000013629  | 17.1711079                | 4.101911222    | COL2A1         | Up                    |

|                    |             |             |          |    |
|--------------------|-------------|-------------|----------|----|
| ENSOCUG00000022596 | 19.18451487 | 4.261870378 | AK5      | Up |
| ENSOCUG00000009757 | 11.54832349 | 3.529611521 | -        | Up |
| ENSOCUG00000003418 | 11.44731451 | 3.516937283 | PARP14   | Up |
| ENSOCUG00000013304 | 16.91249612 | 4.080017698 | -        | Up |
| ENSOCUG00000013049 | 11.07878903 | 3.469728291 | PLXND1   | Up |
| ENSOCUG00000027981 | 61.13791105 | 5.933995354 | ISG15    | Up |
| ENSOCUG00000000276 | 11.28465155 | 3.496289966 | MOV10    | Up |
| ENSOCUG00000007208 | 23.86456153 | 4.576797925 | MSC      | Up |
| ENSOCUG00000032132 | 44.2853816  | 5.468758645 | IFIT3    | Up |
| ENSOCUG00000015723 | 13.93995489 | 3.801153987 | SLC15A3  | Up |
| ENSOCUG00000006561 | 234.934087  | 7.876112242 | -        | Up |
| ENSOCUG00000031506 | 10.63669913 | 3.410978605 | -        | Up |
| ENSOCUG00000002699 | 16.41992929 | 4.037376009 | PARP9    | Up |
| ENSOCUG00000016568 | 21.1153487  | 4.400220167 | HEY1     | Up |
| ENSOCUG00000003982 | 34.92232593 | 5.126077745 | CORO2B   | Up |
| ENSOCUG00000027849 | 72.21954678 | 6.174317461 | OAS3     | Up |
| ENSOCUG00000025477 | 10.84947472 | 3.43955329  | MYF5     | Up |
| ENSOCUG00000006497 | 9.808917068 | 3.294093868 | PXDN     | Up |
| ENSOCUG00000029637 | 76.63258992 | 6.25988616  | -        | Up |
| ENSOCUG00000022631 | 15.84022205 | 3.985520655 | ZNF536   | Up |
| ENSOCUG00000012881 | 9.441307214 | 3.238986625 | COL1A1   | Up |
| ENSOCUG00000024112 | 11.31109395 | 3.499666561 | LGALS3BP | Up |
| ENSOCUG00000003866 | 9.251726855 | 3.209722673 | FBN1     | Up |
| ENSOCUG00000013278 | 18.12255351 | 4.179714343 | DHX58    | Up |
| ENSOCUG00000012264 | 10.35759638 | 3.37261734  | COL1A2   | Up |
| ENSOCUG00000024734 | 14.12553021 | 3.820233116 | -        | Up |
| ENSOCUG00000027535 | 9.560092838 | 3.257024628 | -        | Up |
| ENSOCUG00000007482 | 9.925247595 | 3.311103092 | CX3CL1   | Up |
| ENSOCUG00000003313 | 9.226205586 | 3.20573744  | LOX      | Up |
| ENSOCUG00000013517 | 12.57997142 | 3.653056739 | -        | Up |
| ENSOCUG00000003371 | 9.813594338 | 3.294781636 | SELENBP1 | Up |
| ENSOCUG00000004055 | 16.36151696 | 4.032234609 | WDR86    | Up |
| ENSOCUG00000014417 | 14.00857089 | 3.808237879 | -        | Up |
| ENSOCUG00000002114 | 11.7052907  | 3.549088858 | TRIM5    | Up |
| ENSOCUG00000007432 | 9.779529199 | 3.289765013 | ACACB    | Up |
| ENSOCUG00000005785 | 16.86471784 | 4.075936276 | ADGRB2   | Up |
| ENSOCUG00000004579 | 8.493304823 | 3.086326029 | NRP1     | Up |
| ENSOCUG00000003636 | 9.559665409 | 3.256960124 | TGM2     | Up |
| ENSOCUG00000016280 | 13.2469109  | 3.727584066 | CXCL10   | Up |
| ENSOCUG00000016911 | 9.233778147 | 3.20692107  | TDRD12   | Up |
| ENSOCUG00000007449 | 9.494982608 | 3.247165358 | -        | Up |
| ENSOCUG00000011474 | 8.738163069 | 3.127330029 | RNF157   | Up |
| ENSOCUG00000029328 | 72.52984204 | 6.180502802 | OASL     | Up |
| ENSOCUG00000023498 | 9.358521835 | 3.226280676 | TBX2     | Up |

|                     |             |             |          |    |
|---------------------|-------------|-------------|----------|----|
| ENSOCUG00000002562  | 10.71612472 | 3.421711372 | PODN     | Up |
| ENSOCUG00000013232  | 8.002938437 | 3.000529811 | COL4A1   | Up |
| ENSOCUG00000015823  | 67.41661883 | 6.075032368 | OAS2     | Up |
| ENSOCUG00000008781  | 8.437509652 | 3.076817247 | ADAM12   | Up |
| ENSOCUG00000023340  | 41.17037002 | 5.36353451  | SIGLEC15 | Up |
| ENSOCUG00000006002  | 12.47532861 | 3.641005913 | -        | Up |
| ENSOCUG00000024055  | 8.56939246  | 3.099192926 | MCAM     | Up |
| ENSOCUG00000016744  | 10.02551947 | 3.325605086 | SPOCK2   | Up |
| ENSOCUG00000007286  | 8.919463584 | 3.156956949 | COL4A4   | Up |
| ENSOCUG00000000092  | 8.014578649 | 3.002626676 | SERPINF1 | Up |
| ENSOCUG00000013022  | 7.847582926 | 2.972248369 | -        | Up |
| ENSOCUG00000014857  | 7.730439174 | 2.950550377 | COL5A3   | Up |
| ENSOCUG00000017566  | 13.83135879 | 3.789870989 | ARNT2    | Up |
| ENSOCUG00000005669  | 9.983808215 | 3.319590221 | ADGRD1   | Up |
| ENSOCUG00000003213  | 7.741180372 | 2.952553565 | PARP12   | Up |
| ENSOCUG00000004418  | 7.773864803 | 2.958632018 | CREB3L1  | Up |
| ENSOCUG00000027205  | 11.26763695 | 3.49411308  | SIX2     | Up |
| ENSOCUG00000015872  | 14.68611462 | 3.876380859 | -        | Up |
| ENSOCUG00000010231  | 9.216557946 | 3.204228056 | CHRNE    | Up |
| ENSOCUG00000009603  | 7.533358817 | 2.913293247 | FAM114A1 | Up |
| ENSOCUG00000004707  | 11.13727708 | 3.47732465  | OLFM2    | Up |
| ENSOCUG00000003874  | 18.81243103 | 4.233614387 | -        | Up |
| ENSOCUG000000023913 | 10.97609618 | 3.456293124 | -        | Up |
| ENSOCUG000000006105 | 11.29261839 | 3.497308134 | CDHR1    | Up |
| ENSOCUG00000015829  | 10.76131071 | 3.427781901 | FGD3     | Up |
| ENSOCUG00000025358  | 7.803212512 | 2.964068191 | PROS1    | Up |
| ENSOCUG00000038763  | 7.278092268 | 2.863560341 | ATOX1    | Up |
| ENSOCUG00000014268  | 7.794077431 | 2.962378264 | SIX1     | Up |
| ENSOCUG00000011161  | 11.9782005  | 3.582339281 | LRRC17   | Up |
| ENSOCUG00000014444  | 13.61203318 | 3.766810668 | HDAC9    | Up |
| ENSOCUG00000003187  | 9.032210087 | 3.175079043 | REM1     | Up |
| ENSOCUG00000008523  | 7.208784062 | 2.849755934 | FLT1     | Up |
| ENSOCUG00000022422  | 35.98446836 | 5.169302439 | COLCA2   | Up |
| ENSOCUG00000004881  | 26.0710665  | 4.704377696 | AMOT     | Up |
| ENSOCUG00000011779  | 8.064999344 | 3.011674416 | TNFRSF19 | Up |
| ENSOCUG00000006034  | 7.270375694 | 2.862029917 | FHL1     | Up |
| ENSOCUG00000017892  | 10.838623   | 3.438109576 | ZC3HAV1  | Up |
| ENSOCUG000000022941 | 13.4277906  | 3.747150039 | DTX3L    | Up |
| ENSOCUG00000001752  | 12.63297541 | 3.659122567 | GPC3     | Up |
| ENSOCUG00000002794  | 10.02404533 | 3.325392938 | ZNF618   | Up |
| ENSOCUG00000002800  | Inf         | Inf         | KIF12    | Up |
| ENSOCUG00000007504  | 8.371783959 | 3.065535082 | VSTM4    | Up |
| ENSOCUG00000013276  | 6.758250457 | 2.756649817 | COL4A2   | Up |
| ENSOCUG00000000041  | 9.502366392 | 3.248286835 | NKX2-5   | Up |

|                     |             |             |         |    |
|---------------------|-------------|-------------|---------|----|
| ENSOCUG00000001607  | 8.666274158 | 3.115411877 | -       | Up |
| ENSOCUG00000006006  | 11.97971487 | 3.582521666 | SLC28A1 | Up |
| ENSOCUG00000006190  | 6.988037211 | 2.804887291 | NCAM1   | Up |
| ENSOCUG000000027149 | 7.674042793 | 2.93998681  | -       | Up |
| ENSOCUG00000017723  | 11.09677715 | 3.472068829 | CAVIN2  | Up |
| ENSOCUG00000005767  | 15.14070892 | 3.920360852 | HMGCS2  | Up |
| ENSOCUG00000013564  | 12.01060166 | 3.586236518 | TRIM63  | Up |
| ENSOCUG00000013489  | 17.30485998 | 4.113105363 | -       | Up |
| ENSOCUG00000013105  | 13.58737669 | 3.764195037 | PLCG2   | Up |
| ENSOCUG00000026441  | 21.85125329 | 4.449644123 | -       | Up |
| ENSOCUG00000025148  | 6.66674817  | 2.736983232 | -       | Up |
| ENSOCUG00000014935  | 6.966286736 | 2.800389856 | -       | Up |
| ENSOCUG00000014915  | 21.22917108 | 4.407976135 | STAC2   | Up |
| ENSOCUG00000007694  | 224.5560915 | 7.810932048 | CNIH3   | Up |
| ENSOCUG00000007190  | 11.99827867 | 3.58475554  | -       | Up |
| ENSOCUG00000003269  | 8.565996718 | 3.098621124 | MYRF    | Up |
| ENSOCUG00000000080  | 7.052940809 | 2.818224932 | PLEKHA2 | Up |
| ENSOCUG00000002553  | 6.735237371 | 2.751728792 | EMILIN2 | Up |
| ENSOCUG00000006947  | 10.4564447  | 3.386320499 | PROB1   | Up |
| ENSOCUG00000026736  | 7.805227484 | 2.96444068  | SGCA    | Up |
| ENSOCUG00000023917  | 7.347545612 | 2.87726241  | EBF4    | Up |
| ENSOCUG00000002898  | 7.261468395 | 2.860261316 | FBLN7   | Up |
| ENSOCUG00000010104  | 6.335724578 | 2.663509621 | FN1     | Up |
| ENSOCUG00000016945  | 6.623029556 | 2.727491296 | ITIH5   | Up |
| ENSOCUG00000014625  | 6.454001906 | 2.690194004 | HEG1    | Up |
| ENSOCUG00000002828  | 6.411010699 | 2.680551816 | IGFBP4  | Up |
| ENSOCUG00000001499  | 7.04392392  | 2.816379327 | PLEKHA4 | Up |
| ENSOCUG00000002988  | 7.830191146 | 2.969047526 | ATP1B2  | Up |
| ENSOCUG00000025884  | 6.902848223 | 2.787191763 | RCAN2   | Up |
| ENSOCUG00000003380  | 10.51632537 | 3.394558779 | FGFR4   | Up |
| ENSOCUG00000005094  | 6.690530082 | 2.742120518 | INHBB   | Up |
| ENSOCUG00000007319  | 7.708722292 | 2.946491756 | GPX7    | Up |
| ENSOCUG00000007728  | 6.522083972 | 2.705333016 | TTYH2   | Up |
| ENSOCUG00000015039  | 6.667069788 | 2.737052829 | FNDC1   | Up |
| ENSOCUG00000025675  | 7.851359923 | 2.972942563 | EDN3    | Up |
| ENSOCUG00000027464  | 17.77940792 | 4.152135376 | SALL2   | Up |
| ENSOCUG00000026922  | 6.213904437 | 2.635500055 | ADAMTS7 | Up |
| ENSOCUG00000009655  | 6.738875927 | 2.752507964 | LAMA4   | Up |
| ENSOCUG00000008768  | 25.78059425 | 4.688213614 | -       | Up |
| ENSOCUG00000001473  | 8.993448187 | 3.168874367 | S100B   | Up |
| ENSOCUG00000017440  | 6.112203376 | 2.611692548 | ERFE    | Up |
| ENSOCUG00000000716  | 7.336759335 | 2.875142962 | EPSTI1  | Up |
| ENSOCUG000000011415 | 7.488463823 | 2.904669796 | TGFB3   | Up |
| ENSOCUG00000006673  | 7.769028063 | 2.957734123 | A4GALT  | Up |

|                     |             |             |         |    |
|---------------------|-------------|-------------|---------|----|
| ENSOCUG00000011360  | 6.406646261 | 2.679569335 | SLC4A3  | Up |
| ENSOCUG00000017305  | 6.184209795 | 2.628589263 | COQ8A   | Up |
| ENSOCUG00000014480  | 6.200580924 | 2.632403386 | CIR     | Up |
| ENSOCUG00000006145  | 14.57609806 | 3.865532665 | CHRD1   | Up |
| ENSOCUG00000005827  | 6.438525453 | 2.686730321 | -       | Up |
| ENSOCUG00000015151  | 30.05403541 | 4.909486812 | NME9    | Up |
| ENSOCUG00000004894  | 7.424244368 | 2.892244197 | PHYHD1  | Up |
| ENSOCUG00000007492  | 7.291414349 | 2.866198688 | LMOD1   | Up |
| ENSOCUG00000011042  | 6.445751899 | 2.688348659 | COL8A2  | Up |
| ENSOCUG00000014953  | 6.224907253 | 2.638052342 | SYNE3   | Up |
| ENSOCUG00000002188  | 7.229476089 | 2.853891101 | FES     | Up |
| ENSOCUG00000011145  | 5.994807921 | 2.583713529 | OBSL1   | Up |
| ENSOCUG00000008855  | 5.98120839  | 2.580436983 | -       | Up |
| ENSOCUG00000000611  | 5.934294877 | 2.569076617 | FKBP10  | Up |
| ENSOCUG00000007685  | 7.632274326 | 2.932113027 | ANGPTL2 | Up |
| ENSOCUG00000011484  | 6.023342135 | 2.590564208 | TNFAIP2 | Up |
| ENSOCUG00000009526  | 6.009864071 | 2.587332361 | VASH1   | Up |
| ENSOCUG00000008635  | 6.314195044 | 2.658598826 | -       | Up |
| ENSOCUG00000009222  | 5.635781774 | 2.494615749 | VIM     | Up |
| ENSOCUG00000003913  | 6.006733596 | 2.58658068  | TRIM14  | Up |
| ENSOCUG00000012337  | 6.117025233 | 2.612830227 | COL21A1 | Up |
| ENSOCUG00000002131  | 6.998090296 | 2.80696128  | PSMB8   | Up |
| ENSOCUG000000027804 | 14.74666957 | 3.882317264 | SOBP    | Up |
| ENSOCUG00000001035  | 5.585217057 | 2.481613349 | ADAMTS2 | Up |
| ENSOCUG00000006516  | 6.135081365 | 2.617082478 | ZEB1    | Up |
| ENSOCUG00000002339  | 18.02794876 | 4.17216335  | IRF7    | Up |
| ENSOCUG00000004472  | 5.407503065 | 2.434962578 | PLPP1   | Up |
| ENSOCUG00000012217  | 8.228525273 | 3.040633892 | APCDD1  | Up |
| ENSOCUG000000022014 | 5.524844743 | 2.465933923 | NOTCH3  | Up |
| ENSOCUG00000001844  | 12.82215559 | 3.680566915 | PYCR1   | Up |
| ENSOCUG00000000409  | 8.397292115 | 3.069924175 | -       | Up |
| ENSOCUG00000005247  | 5.499027594 | 2.459176526 | FSTL1   | Up |
| ENSOCUG00000007753  | 6.402616616 | 2.678661625 | THY1    | Up |
| ENSOCUG00000015163  | 9.544292518 | 3.25463826  | NYNRIN  | Up |
| ENSOCUG00000005141  | 16.94935877 | 4.083158789 | -       | Up |
| ENSOCUG00000039017  | 5.995075794 | 2.583777993 | METTL27 | Up |
| ENSOCUG00000027605  | 15.89607032 | 3.990598254 | ISL1    | Up |
| ENSOCUG000000025772 | 5.787739031 | 2.532999872 | DLG4    | Up |
| ENSOCUG00000005845  | 6.211367288 | 2.634910879 | -       | Up |
| ENSOCUG00000029649  | 11.5894112  | 3.534735367 | HEY2    | Up |
| ENSOCUG00000004484  | 9.816427418 | 3.295198067 | GLRB    | Up |
| ENSOCUG00000022122  | 33.8262849  | 5.080072831 | ZNF467  | Up |
| ENSOCUG00000011746  | 5.773885217 | 2.529542428 | NR4A1   | Up |
| ENSOCUG00000006382  | 5.992978439 | 2.583273183 | ZCCHC24 | Up |

|                    |             |             |          |    |
|--------------------|-------------|-------------|----------|----|
| ENSOCUG00000021885 | 10.04054657 | 3.327765901 | -        | Up |
| ENSOCUG00000012685 | 5.521594264 | 2.46508488  | PITX2    | Up |
| ENSOCUG00000000224 | 7.600228415 | 2.926042778 | -        | Up |
| ENSOCUG00000026233 | 52.77545226 | 5.721795132 | PLAAT2   | Up |
| ENSOCUG00000015136 | 6.227711096 | 2.638702019 | NIBAN1   | Up |
| ENSOCUG00000027718 | 7.082542966 | 2.824267449 | PRSS56   | Up |
| ENSOCUG00000013540 | 6.045954801 | 2.595970194 | EPHB2    | Up |
| ENSOCUG00000025830 | 5.712087559 | 2.514018094 | CAPN5    | Up |
| ENSOCUG00000016390 | 7.918779271 | 2.985278047 | CCN4     | Up |
| ENSOCUG00000014794 | 10.07075028 | 3.332099265 | ATP2A3   | Up |
| ENSOCUG00000013403 | 6.711783718 | 2.746696227 | L3HYPDH  | Up |
| ENSOCUG00000013696 | 5.308702852 | 2.408359391 | BICC1    | Up |
| ENSOCUG00000001536 | 14.97449442 | 3.904435389 | -        | Up |
| ENSOCUG00000032044 | 5.232200976 | 2.387417958 | -        | Up |
| ENSOCUG00000026029 | 5.181326814 | 2.373321585 | -        | Up |
| ENSOCUG00000001754 | 5.377112812 | 2.42683174  | FMNL3    | Up |
| ENSOCUG00000007631 | 11.05508237 | 3.46663787  | GPM6A    | Up |
| ENSOCUG00000014596 | 5.121472164 | 2.356558572 | LOXL2    | Up |
| ENSOCUG00000008288 | 10.28193962 | 3.36204054  | ECM2     | Up |
| ENSOCUG00000023670 | 8.628649521 | 3.109134779 | RAMP2    | Up |
| ENSOCUG00000001711 | 8.018435744 | 3.00332082  | TRO      | Up |
| ENSOCUG00000011158 | 10.08308988 | 3.333865903 | FAM131B  | Up |
| ENSOCUG00000017761 | 12.97171974 | 3.697297854 | TCF21    | Up |
| ENSOCUG00000026479 | 5.508942886 | 2.461775506 | SERPING1 | Up |
| ENSOCUG00000027972 | 9.193671512 | 3.20064112  | -        | Up |
| ENSOCUG00000010972 | 5.076407587 | 2.343807908 | -        | Up |
| ENSOCUG00000006596 | 6.288606558 | 2.652740377 | CHST1    | Up |
| ENSOCUG00000027792 | 6.799033397 | 2.765329656 | TMEM52   | Up |
| ENSOCUG00000032150 | 9.163725037 | 3.19593417  | FDCSP    | Up |
| ENSOCUG00000022774 | 11.39335438 | 3.510120656 | -        | Up |
| ENSOCUG00000012279 | 7.107910706 | 2.829425557 | ARMH4    | Up |
| ENSOCUG00000001920 | 5.808722847 | 2.538220996 | GPRC5B   | Up |
| ENSOCUG00000010507 | 8.169900855 | 3.030318571 | NPR3     | Up |
| ENSOCUG00000006310 | 9.439161298 | 3.238658677 | PPM1J    | Up |
| ENSOCUG00000022125 | 6.913579355 | 2.789432828 | IL34     | Up |
| ENSOCUG00000000810 | 5.147323963 | 2.363822586 | PRICKLE2 | Up |
| ENSOCUG00000006982 | 5.436215005 | 2.442602517 | -        | Up |
| ENSOCUG00000012661 | 5.758945232 | 2.525804602 | PTPRU    | Up |
| ENSOCUG00000013720 | 5.547131105 | 2.471741824 | CLYBL    | Up |
| ENSOCUG00000031924 | 17.37112978 | 4.118619682 | -        | Up |
| ENSOCUG00000009699 | 5.509523125 | 2.461927452 | KIF5C    | Up |
| ENSOCUG00000027729 | 8.112284949 | 3.020108329 | -        | Up |
| ENSOCUG00000004623 | 8.021211647 | 3.00382018  | GALNT16  | Up |
| ENSOCUG00000032540 | 8.285825062 | 3.050645361 | -        | Up |

|                     |             |             |          |    |
|---------------------|-------------|-------------|----------|----|
| ENSOCUG00000013367  | 4.871769313 | 2.284445821 | COL11A1  | Up |
| ENSOCUG00000007857  | 5.594644384 | 2.484046431 | LRRK2    | Up |
| ENSOCUG00000009306  | 5.596029498 | 2.484403567 | LARP6    | Up |
| ENSOCUG00000021185  | 7.484476957 | 2.903901499 | FNDC5    | Up |
| ENSOCUG00000014468  | 5.738083321 | 2.520568917 | C1S      | Up |
| ENSOCUG00000029611  | 10.64148524 | 3.411627618 | IL7      | Up |
| ENSOCUG00000026159  | 8.983677687 | 3.167306168 | KIAA1755 | Up |
| ENSOCUG00000022907  | 14.72709084 | 3.880400566 | RORC     | Up |
| ENSOCUG00000037302  | 6.749951085 | 2.754877047 | GPR4     | Up |
| ENSOCUG00000003273  | 5.180113769 | 2.372983784 | ITGA2B   | Up |
| ENSOCUG00000008181  | 5.70896448  | 2.513229086 | -        | Up |
| ENSOCUG00000003680  | 6.567278663 | 2.715295673 | GSTA4    | Up |
| ENSOCUG00000003165  | 5.366149634 | 2.423887284 | SCUBE2   | Up |
| ENSOCUG00000011733  | 6.381454358 | 2.673885257 | AKAP5    | Up |
| ENSOCUG00000003298  | 4.94568824  | 2.3061713   | -        | Up |
| ENSOCUG00000010618  | 6.905777973 | 2.787803951 | ANK2     | Up |
| ENSOCUG00000015469  | 5.824716616 | 2.542187861 | CTSO     | Up |
| ENSOCUG000000025123 | 8.612511954 | 3.10643408  | GCNT4    | Up |
| ENSOCUG00000023882  | 5.133576363 | 2.359964246 | GRIK5    | Up |
| ENSOCUG00000002733  | 5.254420748 | 2.393531729 | CACNA1G  | Up |
| ENSOCUG00000014676  | 4.715013672 | 2.237261954 | LAMB1    | Up |
| ENSOCUG00000039461  | Inf         | Inf         | FAM110D  | Up |
| ENSOCUG00000002052  | 5.181227184 | 2.373293844 | LRP4     | Up |
| ENSOCUG00000012691  | 5.779602115 | 2.530970177 | GJC1     | Up |
| ENSOCUG00000029688  | 40.86865769 | 5.352922955 | HERC6    | Up |
| ENSOCUG00000022385  | 4.749852011 | 2.247882565 | -        | Up |
| ENSOCUG00000000131  | 5.396220933 | 2.431949417 | NXPE3    | Up |
| ENSOCUG00000010955  | 5.388711388 | 2.42994032  | HSPG2    | Up |
| ENSOCUG00000010681  | 5.290656169 | 2.403446662 | PAPLN    | Up |
| ENSOCUG00000005631  | 5.689287939 | 2.508248099 | -        | Up |
| ENSOCUG00000017504  | 8.906845819 | 3.154914621 | SYT9     | Up |
| ENSOCUG00000012087  | 8.616380627 | 3.107081982 | EFHC1    | Up |
| ENSOCUG00000004590  | 5.045116042 | 2.334887453 | -        | Up |
| ENSOCUG00000024308  | 5.063144707 | 2.340033718 | MMP11    | Up |
| ENSOCUG00000038415  | 5.513540568 | 2.462979056 | -        | Up |
| ENSOCUG00000015805  | 8.304713778 | 3.053930446 | NOX5     | Up |
| ENSOCUG00000014702  | 13.13419844 | 3.715256252 | -        | Up |
| ENSOCUG00000039007  | 11.96018341 | 3.580167608 | LENEP    | Up |
| ENSOCUG00000003924  | 10.71664729 | 3.421781723 | -        | Up |
| ENSOCUG00000016347  | 13.54572687 | 3.759765907 | PHOSPHO1 | Up |
| ENSOCUG00000025341  | 11.10454436 | 3.473078293 | ADSS1    | Up |
| ENSOCUG00000010740  | 5.724712617 | 2.517203271 | TARS3    | Up |
| ENSOCUG00000027672  | 6.907131685 | 2.788086729 | PPFIA4   | Up |
| ENSOCUG00000017667  | 90.88867532 | 6.506028641 | ATP1A2   | Up |

|                      |             |             |          |    |
|----------------------|-------------|-------------|----------|----|
| ENSOCUG00000005513   | 4.46796886  | 2.159619131 | FKBP5    | Up |
| ENSOCUG00000001553   | 4.707560936 | 2.23497977  | LIPA     | Up |
| ENSOCUG00000000638   | 4.699239813 | 2.232427394 | GLI2     | Up |
| ENSOCUG000000009543  | 8.1632491   | 3.029143482 | KCNMA1   | Up |
| ENSOCUG000000008985  | 5.62399012  | 2.49159406  | EBF1     | Up |
| ENSOCUG000000008754  | 7.037086473 | 2.814978241 | CAMKV    | Up |
| ENSOCUG000000016321  | 5.734676545 | 2.519712116 | GLT8D2   | Up |
| ENSOCUG000000029555  | 9.866990319 | 3.302610093 | -        | Up |
| ENSOCUG000000002973  | 5.005875852 | 2.323622512 | PTCH1    | Up |
| ENSOCUG000000015882  | 5.768884805 | 2.528292456 | EPDR1    | Up |
| ENSOCUG000000014205  | 5.147115615 | 2.363764189 | AKAP6    | Up |
| ENSOCUG000000016632  | 5.093675584 | 2.348707077 | PDE7B    | Up |
| ENSOCUG000000029735  | 6.758947135 | 2.75679853  | -        | Up |
| ENSOCUG000000016007  | 4.509494789 | 2.172965814 | NID1     | Up |
| ENSOCUG000000025757  | 7.438905887 | 2.895090446 | TMEM200B | Up |
| ENSOCUG000000004447  | 7.013693855 | 2.810174459 | ALPL     | Up |
| ENSOCUG000000002455  | 4.369067267 | 2.127325318 | STAT1    | Up |
| ENSOCUG000000008915  | 6.201446628 | 2.632604796 | EBF3     | Up |
| ENSOCUG000000011916  | 4.684747334 | 2.22797124  | SNTA1    | Up |
| ENSOCUG000000000008  | Inf         | Inf         | CCIN     | Up |
| ENSOCUG000000014993  | 4.703763795 | 2.233815615 | DENND2A  | Up |
| ENSOCUG000000006729  | 7.392528694 | 2.886067938 | GRK3     | Up |
| ENSOCUG000000001519  | 4.631868001 | 2.21159414  | RTN4RL1  | Up |
| ENSOCUG0000000023406 | 6.216397999 | 2.636078874 | PPP1R14A | Up |
| ENSOCUG000000002139  | 15.33559913 | 3.938812626 | -        | Up |
| ENSOCUG000000008356  | 67.58181984 | 6.078563295 | -        | Up |
| ENSOCUG000000014113  | 4.879418973 | 2.286709366 | -        | Up |
| ENSOCUG0000000021405 | 7.877331951 | 2.977707072 | MYOD1    | Up |
| ENSOCUG000000013369  | 4.490233627 | 2.166790511 | -        | Up |
| ENSOCUG000000017198  | 5.63949592  | 2.495566215 | TUB      | Up |
| ENSOCUG000000013552  | 7.227643242 | 2.853525296 | KCNN3    | Up |
| ENSOCUG000000010666  | 4.857711433 | 2.280276791 | -        | Up |
| ENSOCUG000000003764  | 4.210070019 | 2.073844228 | -        | Up |
| ENSOCUG000000017133  | 8.311948677 | 3.055186746 | GDPD2    | Up |
| ENSOCUG000000006288  | 5.137714715 | 2.361126783 | NINL     | Up |
| ENSOCUG000000002736  | 4.977185919 | 2.315330279 | SEMA6C   | Up |
| ENSOCUG000000038788  | 5.029205787 | 2.330330587 | -        | Up |
| ENSOCUG000000037248  | 5.135530617 | 2.360513347 | GPC6     | Up |
| ENSOCUG000000014957  | 8.827282691 | 3.1419694   | FRMD3    | Up |
| ENSOCUG000000035699  | 10.18849654 | 3.348869272 | -        | Up |
| ENSOCUG000000005991  | 4.683240575 | 2.22750715  | ALPK3    | Up |
| ENSOCUG000000030778  | 6.334147881 | 2.66315055  | -        | Up |
| ENSOCUG000000009017  | 12.25419681 | 3.615204023 | OGN      | Up |
| ENSOCUG000000027132  | 11.59438696 | 3.535354635 | -        | Up |



|                     |             |             |          |    |
|---------------------|-------------|-------------|----------|----|
| ENSOCUG00000001522  | 15.96967728 | 3.997263254 | -        | Up |
| ENSOCUG00000000227  | 4.610591303 | 2.204951787 | ASAP3    | Up |
| ENSOCUG000000015278 | 16.22840316 | 4.020449144 | PIPOX    | Up |
| ENSOCUG000000006251 | 4.818545456 | 2.268597715 | ADAM2    | Up |
| ENSOCUG000000006408 | 4.370845054 | 2.127912236 | DISP1    | Up |
| ENSOCUG000000017377 | 9.419052694 | 3.23558197  | MATN2    | Up |
| ENSOCUG000000009702 | 5.043715625 | 2.334486936 | FMOD     | Up |
| ENSOCUG000000014661 | 4.554000983 | 2.187134603 | NAAA     | Up |
| ENSOCUG000000010959 | 10.43511046 | 3.383373967 | ZIC4     | Up |
| ENSOCUG000000015575 | 4.472960604 | 2.161230052 | GABBR1   | Up |
| ENSOCUG000000013248 | 5.280513652 | 2.400678272 | SLC25A43 | Up |
| ENSOCUG000000008892 | 7.158486966 | 2.839654688 | RAPSN    | Up |
| ENSOCUG000000012610 | 4.418540225 | 2.143569818 | CDON     | Up |
| ENSOCUG000000005760 | 4.905219462 | 2.294317685 | TMEM63C  | Up |
| ENSOCUG000000005033 | 10.45808074 | 3.386546208 | DGAT2L6  | Up |
| ENSOCUG000000022067 | 4.712584743 | 2.236518562 | DLX4     | Up |
| ENSOCUG000000000581 | 4.589832125 | 2.198441388 | NAGLU    | Up |
| ENSOCUG000000007916 | 15.91812084 | 3.992598128 | GCNT1    | Up |
| ENSOCUG000000023147 | 4.599838918 | 2.20158334  | PDLIM4   | Up |
| ENSOCUG000000004215 | 4.558850752 | 2.188670179 | FGF11    | Up |
| ENSOCUG000000000974 | 8.569359033 | 3.099187298 | -        | Up |
| ENSOCUG000000015932 | 6.724560002 | 2.749439873 | -        | Up |
| ENSOCUG000000023898 | 6.510286204 | 2.702720968 | CCDC8    | Up |
| ENSOCUG000000026781 | 5.955967392 | 2.574335855 | F5       | Up |
| ENSOCUG000000005225 | 5.279167661 | 2.400310485 | LURAP1   | Up |
| ENSOCUG000000035940 | 6.502581815 | 2.701012646 | -        | Up |
| ENSOCUG000000006151 | 4.199389821 | 2.070179717 | PDIA5    | Up |
| ENSOCUG000000013463 | 6.285414073 | 2.65200779  | MELTF    | Up |
| ENSOCUG000000003928 | 4.715301097 | 2.237349898 | SEPTIN6  | Up |
| ENSOCUG000000009113 | 7.390531929 | 2.885678205 | PDE1C    | Up |
| ENSOCUG000000025973 | 10.74985091 | 3.426244746 | POPDC3   | Up |
| ENSOCUG000000006872 | 5.53932003  | 2.469708892 | EMILIN1  | Up |
| ENSOCUG000000011016 | 4.34359857  | 2.118890777 | -        | Up |
| ENSOCUG000000005073 | 35.46634461 | 5.148378739 | -        | Up |
| ENSOCUG000000023629 | 4.425599299 | 2.145872833 | TPCN1    | Up |
| ENSOCUG000000015652 | 4.799798923 | 2.262973969 | RECK     | Up |
| ENSOCUG000000003161 | 6.161359225 | 2.623248651 | NRIP3    | Up |
| ENSOCUG000000001701 | 5.559011046 | 2.474828249 | FOXF1    | Up |
| ENSOCUG000000010592 | 4.080922777 | 2.028895411 | BMP1     | Up |
| ENSOCUG000000002690 | 4.131147032 | 2.046542408 | ACSF2    | Up |
| ENSOCUG000000027790 | 5.617031648 | 2.489807931 | NEURL1B  | Up |
| ENSOCUG000000014602 | 4.11014328  | 2.039188687 | ITGB5    | Up |
| ENSOCUG000000007470 | 4.394466798 | 2.135688127 | ZBTB16   | Up |
| ENSOCUG000000001481 | 9.407239974 | 3.233771507 | RIPOR2   | Up |

|                     |             |             |          |    |
|---------------------|-------------|-------------|----------|----|
| ENSOCUG00000030705  | 11.410689   | 3.512314001 | GPR162   | Up |
| ENSOCUG00000022094  | 4.322261587 | 2.111786388 | C1QTNF5  | Up |
| ENSOCUG000000024221 | 98.32062608 | 6.619422197 | INMT     | Up |
| ENSOCUG000000008172 | 4.702061822 | 2.233293507 | -        | Up |
| ENSOCUG00000015240  | 7.845227725 | 2.971815325 | SLC2A4   | Up |
| ENSOCUG00000025680  | 4.472252471 | 2.161001635 | LRRC75A  | Up |
| ENSOCUG00000000076  | 4.345834266 | 2.119633156 | SLC43A2  | Up |
| ENSOCUG00000017203  | 6.608582262 | 2.724340804 | GNAO1    | Up |
| ENSOCUG00000038704  | 6.02301438  | 2.590485703 | -        | Up |
| ENSOCUG00000009218  | 5.708074093 | 2.513004062 | PDE10A   | Up |
| ENSOCUG00000014174  | 4.196058014 | 2.069034624 | ZNF395   | Up |
| ENSOCUG00000027817  | 34.30546287 | 5.100366427 | PPP1R16B | Up |
| ENSOCUG00000003528  | 4.78092846  | 2.257290818 | ATOH8    | Up |
| ENSOCUG00000010508  | 4.04066607  | 2.014593129 | IDH2     | Up |
| ENSOCUG00000013467  | 6.59594176  | 2.72157866  | RNF150   | Up |
| ENSOCUG00000002435  | 4.318432253 | 2.110507657 | -        | Up |
| ENSOCUG00000005096  | 5.75482979  | 2.524773259 | HUNK     | Up |
| ENSOCUG000000005324 | 4.100023845 | 2.0356323   | MAP1A    | Up |
| ENSOCUG00000009276  | 4.46798598  | 2.159624659 | MYBPC1   | Up |
| ENSOCUG00000010718  | 3.943784581 | 1.97958075  | TIMP1    | Up |
| ENSOCUG00000016660  | 9.201843673 | 3.201922947 | SFRP2    | Up |
| ENSOCUG00000002740  | 5.057255926 | 2.338354789 | RPS6KA2  | Up |
| ENSOCUG00000000857  | 4.342769331 | 2.118615325 | FUT10    | Up |
| ENSOCUG00000021287  | 5.135305007 | 2.360449967 | HSPB6    | Up |
| ENSOCUG00000001039  | 4.36651318  | 2.126481695 | SYNGAP1  | Up |
| ENSOCUG00000025762  | 4.012981677 | 2.004674569 | PGPEP1   | Up |
| ENSOCUG00000024108  | 5.483535094 | 2.455106262 | -        | Up |
| ENSOCUG00000003606  | 4.080163027 | 2.028626798 | KIF21B   | Up |
| ENSOCUG00000009512  | 5.683451831 | 2.506767413 | PLA1A    | Up |
| ENSOCUG00000010563  | 3.983830893 | 1.994156409 | TAPBP    | Up |
| ENSOCUG00000022364  | 4.833865323 | 2.273177279 | -        | Up |
| ENSOCUG00000002537  | 9.201465124 | 3.201863596 | ROBO1    | Up |
| ENSOCUG00000009428  | 4.477062709 | 2.162552526 | RAB6B    | Up |
| ENSOCUG00000017803  | 16.66519127 | 4.05876597  | -        | Up |
| ENSOCUG00000008424  | 4.054284532 | 2.019447341 | -        | Up |
| ENSOCUG00000025111  | 72.04564994 | 6.170839419 | GALNT15  | Up |
| ENSOCUG00000007327  | 4.236329123 | 2.082814677 | CNTNAP1  | Up |
| ENSOCUG00000016774  | 7.227064043 | 2.853409679 | ECHDC2   | Up |
| ENSOCUG00000029119  | 5.25255869  | 2.393020377 | ZNF454   | Up |
| ENSOCUG00000033095  | 3.935516918 | 1.976553142 | -        | Up |
| ENSOCUG00000002857  | 3.955382919 | 1.983817368 | PSME2    | Up |
| ENSOCUG00000021480  | 8.725834598 | 3.125293127 | FOXS1    | Up |
| ENSOCUG00000009858  | 4.204965365 | 2.072093917 | KLHL30   | Up |
| ENSOCUG00000004347  | 10.16356787 | 3.345335036 | SCN4A    | Up |

|                    |             |             |         |    |
|--------------------|-------------|-------------|---------|----|
| ENSOCUG00000013125 | 4.84862885  | 2.277576823 | ACSS1   | Up |
| ENSOCUG00000000440 | 49.30901805 | 5.623779618 | CYP7B1  | Up |
| ENSOCUG00000013689 | 3.961789471 | 1.986152218 | LAPTM4B | Up |
| ENSOCUG00000038328 | 10.75765572 | 3.427291819 | -       | Up |
| ENSOCUG00000017251 | 3.715241811 | 1.893456113 | GBP1    | Up |
| ENSOCUG00000000470 | 4.078962723 | 2.028202323 | -       | Up |
| ENSOCUG00000021203 | 5.077042653 | 2.34398838  | DNPH1   | Up |
| ENSOCUG00000000805 | 4.436922654 | 2.149559404 | FKBP14  | Up |
| ENSOCUG00000029603 | 4.367416066 | 2.126779977 | ZNF74   | Up |
| ENSOCUG00000021648 | 6.328029152 | 2.661756246 | KCNK12  | Up |
| ENSOCUG00000017676 | 6.119643475 | 2.613447605 | -       | Up |
| ENSOCUG00000002662 | 4.027258613 | 2.009798119 | -       | Up |
| ENSOCUG00000001616 | 4.81706239  | 2.26815361  | PCSK5   | Up |
| ENSOCUG00000002095 | 4.344745597 | 2.119271704 | NR1H3   | Up |
| ENSOCUG00000014973 | 3.878326726 | 1.955434347 | GALK1   | Up |
| ENSOCUG00000009692 | 4.036615223 | 2.013146073 | -       | Up |
| ENSOCUG00000003685 | 4.698470209 | 2.232191101 | ZNF423  | Up |
| ENSOCUG00000001305 | 4.373647788 | 2.128837044 | PHETA2  | Up |
| ENSOCUG00000012903 | 5.322764355 | 2.412175698 | SIM2    | Up |
| ENSOCUG00000004979 | 3.800984922 | 1.926373302 | KDELR3  | Up |
| ENSOCUG00000022415 | Inf         | Inf         | FAM162B | Up |
| ENSOCUG00000009825 | 4.201658326 | 2.070958849 | BPHL    | Up |
| ENSOCUG00000005792 | 3.881537802 | 1.956628338 | ARL3    | Up |
| ENSOCUG00000005897 | 3.905880278 | 1.965647729 | B4GALT2 | Up |
| ENSOCUG00000001429 | 5.290125862 | 2.403302047 | MAOA    | Up |
| ENSOCUG00000027040 | 4.326807413 | 2.113302908 | LOXL3   | Up |
| ENSOCUG00000012783 | 4.58652763  | 2.197402331 | DAGLA   | Up |
| ENSOCUG00000002818 | 5.679458484 | 2.50575338  | PIMREG  | Up |
| ENSOCUG00000012556 | 7.635400947 | 2.932703917 | NFATC2  | Up |
| ENSOCUG00000027243 | 3.885781563 | 1.958204803 | -       | Up |
| ENSOCUG00000002869 | 4.929563571 | 2.301459926 | REC8    | Up |
| ENSOCUG00000023860 | 25.22597199 | 4.656837954 | ADRA2B  | Up |
| ENSOCUG00000009431 | 4.408105446 | 2.140158735 | NCALD   | Up |
| ENSOCUG00000012799 | 8.82836223  | 3.142145825 | SLC17A7 | Up |
| ENSOCUG00000013251 | 5.027367877 | 2.329803262 | STAC3   | Up |
| ENSOCUG00000026819 | 5.777851721 | 2.53053318  | -       | Up |
| ENSOCUG00000004912 | 4.234238885 | 2.082102665 | GNAZ    | Up |
| ENSOCUG00000008553 | 7.754081564 | 2.954955911 | PRUNE2  | Up |
| ENSOCUG00000003091 | 3.794586739 | 1.923942773 | ADCY7   | Up |
| ENSOCUG00000025091 | 9.228235284 | 3.206054788 | AARD    | Up |
| ENSOCUG00000005539 | 3.756361713 | 1.909335992 | NLGN2   | Up |
| ENSOCUG00000004456 | 3.633747008 | 1.861457979 | MAGED2  | Up |
| ENSOCUG00000015419 | 4.567574608 | 2.191428294 | NEIL2   | Up |
| ENSOCUG00000026185 | 7.059504648 | 2.819566956 | RBM43   | Up |

|                    |             |             |          |    |
|--------------------|-------------|-------------|----------|----|
| ENSOCUG00000012738 | 8.568739782 | 3.099083041 | JAZF1    | Up |
| ENSOCUG00000021438 | 4.650373401 | 2.217346562 | ADGRE5   | Up |
| ENSOCUG00000007605 | 4.292053488 | 2.101668055 | CCDC28B  | Up |
| ENSOCUG00000012883 | 5.418639363 | 2.437930632 | -        | Up |
| ENSOCUG00000024751 | 3.939431147 | 1.97798732  | -        | Up |
| ENSOCUG00000015089 | 4.293931695 | 2.102299242 | TAMALIN  | Up |
| ENSOCUG00000026532 | 13.69101265 | 3.775157254 | SCARA5   | Up |
| ENSOCUG00000012654 | 4.413559651 | 2.141942696 | PREX1    | Up |
| ENSOCUG00000012157 | 9.144207741 | 3.192858179 | RSAD2    | Up |
| ENSOCUG00000012309 | 4.992071891 | 2.319638711 | SGCE     | Up |
| ENSOCUG00000017871 | 4.937617476 | 2.303815073 | ACTN2    | Up |
| ENSOCUG00000026658 | 4.044206728 | 2.015856746 | ADAMTS10 | Up |
| ENSOCUG00000026764 | 3.653122511 | 1.869130137 | -        | Up |
| ENSOCUG00000008439 | 3.743201367 | 1.904272661 | EGR1     | Up |
| ENSOCUG00000013676 | 3.625281584 | 1.858093057 | GSN      | Up |
| ENSOCUG00000024298 | 3.759469692 | 1.910529171 | NINJ1    | Up |
| ENSOCUG00000001802 | 3.947388041 | 1.980898348 | COPZ2    | Up |
| ENSOCUG00000010709 | 6.00641012  | 2.586502986 | SPAG4    | Up |
| ENSOCUG00000016002 | 3.606374048 | 1.850549039 | DPYSL2   | Up |
| ENSOCUG00000014499 | 9.507263259 | 3.24903011  | CLSTN3   | Up |
| ENSOCUG00000026515 | 45.61229908 | 5.511350986 | CXCL11   | Up |
| ENSOCUG00000013771 | 3.968422182 | 1.988565515 | UNC119   | Up |
| ENSOCUG00000006636 | 4.212012118 | 2.074509587 | PECR     | Up |
| ENSOCUG00000003399 | 3.759280613 | 1.91045661  | HMGN3    | Up |
| ENSOCUG00000016897 | 3.978869277 | 1.992358501 | SLC22A17 | Up |
| ENSOCUG00000003519 | 4.689407082 | 2.229405523 | ARHGAP44 | Up |
| ENSOCUG00000026208 | 3.733805766 | 1.90064688  | -        | Up |
| ENSOCUG00000015838 | 6.142675124 | 2.618867084 | COL9A2   | Up |
| ENSOCUG00000001913 | 4.493507358 | 2.167841965 | LDHD     | Up |
| ENSOCUG00000015430 | 6.010750187 | 2.587545061 | TRIM72   | Up |
| ENSOCUG00000015547 | 4.443499102 | 2.151696197 | LIMCH1   | Up |
| ENSOCUG00000010632 | 6.758861624 | 2.756780278 | NPAS3    | Up |
| ENSOCUG00000004997 | 5.507924521 | 2.461508789 | MST1     | Up |
| ENSOCUG00000005115 | 3.841689107 | 1.941740772 | FAP      | Up |
| ENSOCUG00000004222 | 36.33505919 | 5.183290351 | SLC22A3  | Up |
| ENSOCUG00000008579 | 3.711421517 | 1.891971861 | VASH2    | Up |
| ENSOCUG00000014820 | 5.615386198 | 2.489385247 | CYBRD1   | Up |
| ENSOCUG00000012259 | 7.679735705 | 2.941056662 | CMKLR1   | Up |
| ENSOCUG00000007394 | 3.706811775 | 1.89017886  | ADCY6    | Up |
| ENSOCUG00000027941 | 8.117483826 | 3.021032605 | KCNMB4   | Up |
| ENSOCUG00000003347 | 3.636354986 | 1.862493044 | SEMA4C   | Up |
| ENSOCUG00000004160 | 6.770464421 | 2.759254799 | FAM107A  | Up |
| ENSOCUG00000009667 | 8.308636943 | 3.054611818 | GABRE    | Up |
| ENSOCUG00000028025 | 4.150892981 | 2.053421737 | -        | Up |

|                     |             |             |          |    |
|---------------------|-------------|-------------|----------|----|
| ENSOCUG00000011871  | 3.870399409 | 1.952482454 | KIAA1549 | Up |
| ENSOCUG00000012459  | 3.662002749 | 1.872632874 | FHL3     | Up |
| ENSOCUG00000029364  | 4.012754937 | 2.004593052 | IP6K3    | Up |
| ENSOCUG00000001479  | 3.54227029  | 1.8246743   | MAGED1   | Up |
| ENSOCUG00000003594  | 3.477587167 | 1.798086677 | OLFML2B  | Up |
| ENSOCUG00000026348  | 11.29627703 | 3.49777547  | KCNIP2   | Up |
| ENSOCUG00000001337  | 3.738604395 | 1.902499819 | PARM1    | Up |
| ENSOCUG00000002777  | 3.680312495 | 1.87982827  | -        | Up |
| ENSOCUG00000012088  | 5.0560357   | 2.33800665  | EMX2     | Up |
| ENSOCUG00000000861  | 3.964502825 | 1.987139954 | CD82     | Up |
| ENSOCUG000000008029 | 20.78983658 | 4.377806513 | ADRA1D   | Up |
| ENSOCUG00000013289  | 8.954052858 | 3.162540835 | PACRG    | Up |
| ENSOCUG00000005561  | 3.665547281 | 1.874028615 | TMEM9    | Up |
| ENSOCUG00000000153  | 3.756386049 | 1.909345338 | AKR7L    | Up |
| ENSOCUG00000007829  | 10.10749886 | 3.337354136 | SLC17A9  | Up |
| ENSOCUG00000008011  | 20.46464152 | 4.35506149  | ABCA8    | Up |
| ENSOCUG00000012404  | 4.27838123  | 2.097065041 | TMEM38A  | Up |
| ENSOCUG000000009515 | 4.665352189 | 2.221985995 | POPDC2   | Up |
| ENSOCUG00000010870  | 5.881308193 | 2.556137093 | CLMN     | Up |
| ENSOCUG00000006716  | 4.003467244 | 2.001250002 | GPR173   | Up |
| ENSOCUG00000024196  | 4.431118389 | 2.147670873 | -        | Up |
| ENSOCUG00000006784  | 3.530263927 | 1.819776045 | SH3PXD2B | Up |
| ENSOCUG000000009722 | 3.588319181 | 1.843308224 | AHCYL1   | Up |
| ENSOCUG00000003174  | 3.54691474  | 1.826564651 | FARP1    | Up |
| ENSOCUG00000027078  | 4.874687666 | 2.285309785 | -        | Up |
| ENSOCUG00000023000  | 3.664508303 | 1.873619633 | ARHGEF19 | Up |
| ENSOCUG00000014122  | 3.474642093 | 1.79686438  | TPM1     | Up |
| ENSOCUG00000000536  | 10.46470154 | 3.387459261 | IRF8     | Up |
| ENSOCUG00000007489  | 3.785914279 | 1.920641746 | SHISA4   | Up |
| ENSOCUG00000011207  | 3.992480049 | 1.997285198 | MAGEH1   | Up |
| ENSOCUG00000029623  | 6.875605576 | 2.781486786 | ATP2B3   | Up |
| ENSOCUG00000002748  | 3.592204165 | 1.844869349 | S100A13  | Up |
| ENSOCUG00000024492  | 4.955559776 | 2.309048032 | ETV7     | Up |
| ENSOCUG00000015145  | 4.408131285 | 2.140167192 | NFATC4   | Up |
| ENSOCUG00000025067  | 6.627698819 | 2.728508044 | TMEM217  | Up |
| ENSOCUG00000016686  | 3.513195328 | 1.81278379  | -        | Up |
| ENSOCUG00000022645  | Inf         | Inf         | -        | Up |
| ENSOCUG00000025012  | 5.695764597 | 2.509889522 | ANGPT4   | Up |
| ENSOCUG00000009739  | 3.457510072 | 1.789733454 | P4HA1    | Up |
| ENSOCUG00000013482  | 6.805111332 | 2.766618765 | -        | Up |
| ENSOCUG00000011353  | 4.537478841 | 2.181890916 | INHA     | Up |
| ENSOCUG00000008587  | 4.425484917 | 2.145835545 | TNFSF4   | Up |
| ENSOCUG00000004728  | 3.592971285 | 1.845177405 | SHFL     | Up |
| ENSOCUG00000006678  | 9.866704179 | 3.302568255 | JAM2     | Up |

|                     |             |             |         |    |
|---------------------|-------------|-------------|---------|----|
| ENSOCUG00000015162  | 7.12933778  | 2.833768076 | MFAP4   | Up |
| ENSOCUG00000011745  | 3.52131914  | 1.816115986 | HSPA2   | Up |
| ENSOCUG00000016341  | 14.7360126  | 3.881274295 | RAB37   | Up |
| ENSOCUG00000010379  | 4.183525527 | 2.064719238 | FREM1   | Up |
| ENSOCUG00000012326  | 3.83340804  | 1.938627571 | IL18BP  | Up |
| ENSOCUG00000000310  | 27.66967076 | 4.790233573 | IGDCC3  | Up |
| ENSOCUG00000001500  | 3.531911502 | 1.820449194 | -       | Up |
| ENSOCUG00000013420  | 4.340666067 | 2.117916438 | ADGRA2  | Up |
| ENSOCUG00000025952  | 3.881106175 | 1.956467901 | CELSR3  | Up |
| ENSOCUG00000012557  | 16.67131232 | 4.059295769 | SOX6    | Up |
| ENSOCUG00000013427  | 4.557937492 | 2.188381139 | DPEP2   | Up |
| ENSOCUG00000013078  | 3.893444677 | 1.961047127 | FAXDC2  | Up |
| ENSOCUG000000008543 | 6.121749304 | 2.613943965 | TNN     | Up |
| ENSOCUG00000002945  | 6.026489865 | 2.591317948 | MEOX1   | Up |
| ENSOCUG00000015344  | 3.62063902  | 1.856244346 | HEBP1   | Up |
| ENSOCUG00000009340  | 3.535499151 | 1.821913913 | ARAP3   | Up |
| ENSOCUG00000022575  | 14.98224281 | 3.905181703 | -       | Up |
| ENSOCUG00000000901  | 11.73888284 | 3.553223212 | SEZ6L2  | Up |
| ENSOCUG00000016229  | 3.740032025 | 1.903050624 | RABEPK  | Up |
| ENSOCUG00000001799  | 3.467255296 | 1.793794067 | EPB41L2 | Up |
| ENSOCUG00000025121  | 3.620016266 | 1.85599618  | ALDH6A1 | Up |
| ENSOCUG00000008433  | 5.355468621 | 2.421012821 | REEP2   | Up |
| ENSOCUG00000005330  | 3.653594086 | 1.86931636  | ACADSB  | Up |
| ENSOCUG00000004542  | 10.89957237 | 3.446199629 | RIMBP2  | Up |
| ENSOCUG00000004656  | 4.45848123  | 2.156552344 | DOK1    | Up |
| ENSOCUG00000005929  | 3.486943194 | 1.801962861 | MRAS    | Up |
| ENSOCUG00000026154  | 3.853387879 | 1.946127414 | PLPPR2  | Up |
| ENSOCUG00000006539  | 3.341518057 | 1.74050367  | -       | Up |
| ENSOCUG00000017242  | 3.434768856 | 1.780213016 | PDGFC   | Up |
| ENSOCUG00000013259  | 3.400184141 | 1.765612879 | -       | Up |
| ENSOCUG00000011593  | 4.161829441 | 2.057217842 | DCP1B   | Up |
| ENSOCUG00000027251  | 6.305331282 | 2.656572172 | C1orf54 | Up |
| ENSOCUG00000013802  | 3.908201918 | 1.966505006 | ALDOC   | Up |
| ENSOCUG00000015527  | 3.650110702 | 1.867940219 | PYGL    | Up |
| ENSOCUG00000009150  | 24.89002752 | 4.637495921 | TSKS    | Up |
| ENSOCUG00000003250  | 3.600383875 | 1.848150736 | NDN     | Up |
| ENSOCUG00000004023  | 3.62229401  | 1.85690365  | G0S2    | Up |
| ENSOCUG00000026677  | 3.388877023 | 1.760807285 | -       | Up |
| ENSOCUG00000000960  | 4.77910472  | 2.25674038  | SDK2    | Up |
| ENSOCUG00000001999  | 3.271195242 | 1.70981787  | GOLM1   | Up |
| ENSOCUG00000003217  | 5.701748422 | 2.511404385 | COL23A1 | Up |
| ENSOCUG00000022267  | 3.596838058 | 1.846729206 | DDAH2   | Up |
| ENSOCUG00000027617  | 6.004502856 | 2.586044803 | -       | Up |
| ENSOCUG00000026164  | 3.742433391 | 1.903976639 | CAMK1   | Up |

|                     |             |             |         |    |
|---------------------|-------------|-------------|---------|----|
| ENSOCUG00000002200  | 3.916418918 | 1.969535091 | HDDC3   | Up |
| ENSOCUG00000005206  | 4.006881213 | 2.002479741 | SEC16B  | Up |
| ENSOCUG00000009918  | 3.34642445  | 1.742620444 | SCARA3  | Up |
| ENSOCUG00000005428  | 4.10945027  | 2.038945414 | ALOX5   | Up |
| ENSOCUG000000021801 | 3.524075347 | 1.81724477  | EML2    | Up |
| ENSOCUG00000008182  | 3.573409751 | 1.837301353 | CCDC136 | Up |
| ENSOCUG00000010001  | 5.212660752 | 2.38201997  | HSF4    | Up |
| ENSOCUG000000020995 | 3.570913906 | 1.836293351 | HSD17B8 | Up |
| ENSOCUG00000011137  | 3.434530622 | 1.780112948 | FBLN1   | Up |
| ENSOCUG000000021262 | 3.544706255 | 1.825666078 | USP35   | Up |
| ENSOCUG00000010678  | 3.770768838 | 1.914858711 | NOG     | Up |
| ENSOCUG00000015784  | 5.232322007 | 2.38745133  | FYN     | Up |
| ENSOCUG00000014108  | 3.351918598 | 1.744987113 | -       | Up |
| ENSOCUG000000024150 | 9.291607736 | 3.215928249 | SYN1    | Up |
| ENSOCUG00000016689  | 3.503229675 | 1.808685576 | -       | Up |
| ENSOCUG00000014246  | 3.982482457 | 1.993668007 | SORD    | Up |
| ENSOCUG00000009574  | 3.444349781 | 1.784231659 | -       | Up |
| ENSOCUG000000002313 | 4.161191183 | 2.056996574 | SEC14L2 | Up |
| ENSOCUG000000033404 | Inf         | Inf         | -       | Up |
| ENSOCUG00000011097  | 3.458153152 | 1.790001763 | BMP4    | Up |
| ENSOCUG00000017117  | 3.295849807 | 1.7206505   | B2M     | Up |
| ENSOCUG00000004005  | 3.401293518 | 1.76608351  | -       | Up |
| ENSOCUG000000006651 | 5.815202801 | 2.539829506 | -       | Up |
| ENSOCUG00000010192  | 17.62145331 | 4.139261009 | CDH5    | Up |
| ENSOCUG000000027671 | 4.219586398 | 2.077101594 | -       | Up |
| ENSOCUG000000004048 | Inf         | Inf         | WNT3A   | Up |
| ENSOCUG000000002859 | 3.543144168 | 1.825030169 | ADAMTS5 | Up |
| ENSOCUG000000027610 | 5.731405887 | 2.518889069 | SOX11   | Up |
| ENSOCUG000000002320 | 3.421210944 | 1.77450706  | PIK3IP1 | Up |
| ENSOCUG00000016929  | 3.919229259 | 1.970569967 | APBB1   | Up |
| ENSOCUG000000024541 | 8.848228644 | 3.145388666 | CHRNA   | Up |
| ENSOCUG00000007503  | 5.285039621 | 2.401914287 | -       | Up |
| ENSOCUG00000010861  | 4.257056022 | 2.089856076 | PEX11G  | Up |
| ENSOCUG000000025635 | 3.466136944 | 1.793328655 | CAMKK2  | Up |
| ENSOCUG000000025473 | 3.405158912 | 1.767722128 | -       | Up |
| ENSOCUG000000007068 | 19.91074321 | 4.315475168 | CNBD2   | Up |
| ENSOCUG00000017588  | 3.686503412 | 1.882253092 | KLHDC8B | Up |
| ENSOCUG00000017195  | 4.561620356 | 2.189546382 | SEL1L3  | Up |
| ENSOCUG00000016205  | 4.40189179  | 2.13812368  | HOMER2  | Up |
| ENSOCUG000000023919 | 3.826611081 | 1.936067279 | -       | Up |
| ENSOCUG00000014862  | 3.417393305 | 1.772896296 | BIN1    | Up |
| ENSOCUG000000026120 | 5.271619129 | 2.39824614  | FOLH1   | Up |
| ENSOCUG00000017885  | 6.93307861  | 2.793496119 | MUSK    | Up |
| ENSOCUG00000010338  | 3.488089718 | 1.802437148 | -       | Up |

|                     |             |             |         |    |
|---------------------|-------------|-------------|---------|----|
| ENSOCUG00000001894  | 3.311647298 | 1.727549029 | LFNG    | Up |
| ENSOCUG00000002020  | 6.213851156 | 2.635487684 | LGI3    | Up |
| ENSOCUG000000014693 | 38.42634412 | 5.26402382  | PGR     | Up |
| ENSOCUG000000000479 | 3.366657734 | 1.751317059 | -       | Up |
| ENSOCUG000000014694 | 3.550947748 | 1.828204131 | BCAS4   | Up |
| ENSOCUG000000023956 | 5.450524964 | 2.446395189 | -       | Up |
| ENSOCUG000000005628 | 4.01861858  | 2.006699653 | JAM3    | Up |
| ENSOCUG000000010449 | 3.195850545 | 1.676199942 | ADORA2B | Up |
| ENSOCUG000000008355 | 3.444240352 | 1.784185823 | ARSA    | Up |
| ENSOCUG000000029709 | 4.235099289 | 2.082395793 | AKR7A3  | Up |
| ENSOCUG000000008443 | 3.784344398 | 1.920043389 | DCLK2   | Up |
| ENSOCUG000000016704 | 4.454142826 | 2.15514782  | GXYLT2  | Up |
| ENSOCUG000000010187 | 3.376822442 | 1.755666323 | CA9     | Up |
| ENSOCUG000000026669 | 3.528602488 | 1.819096913 | IAH1    | Up |
| ENSOCUG000000008341 | 5.85487262  | 2.549637783 | -       | Up |
| ENSOCUG000000037644 | Inf         | Inf         | PRCD    | Up |
| ENSOCUG000000001297 | 3.512048682 | 1.812312843 | PLEKHG5 | Up |
| ENSOCUG000000014063 | 4.325493412 | 2.112864711 | -       | Up |
| ENSOCUG000000010126 | 3.129471483 | 1.64591903  | ST3GAL5 | Up |
| ENSOCUG000000011686 | 4.096534459 | 2.034403951 | SLC38A3 | Up |
| ENSOCUG000000015619 | 5.245839398 | 2.39117364  | CALB2   | Up |
| ENSOCUG000000006109 | 6.079604196 | 2.603977402 | CNRIP1  | Up |
| ENSOCUG000000013047 | 3.217927585 | 1.686131861 | LAMC1   | Up |
| ENSOCUG000000008144 | 3.450488083 | 1.78680045  | CHCHD6  | Up |
| ENSOCUG000000014272 | 10.1170875  | 3.338722123 | IL19    | Up |
| ENSOCUG000000023110 | 3.437962382 | 1.781553759 | -       | Up |
| ENSOCUG000000004768 | 3.801831272 | 1.926694505 | MYORG   | Up |
| ENSOCUG000000004995 | 4.339420077 | 2.117502253 | PYROXD2 | Up |
| ENSOCUG000000003676 | 44.26656332 | 5.468145468 | SLIT1   | Up |
| ENSOCUG000000015275 | 3.343506176 | 1.741361782 | -       | Up |
| ENSOCUG000000025186 | 5.8395498   | 2.545857149 | -       | Up |
| ENSOCUG000000030349 | 3.920621168 | 1.971082247 | -       | Up |
| ENSOCUG000000008865 | 10.78825168 | 3.431389178 | THSD7A  | Up |
| ENSOCUG000000016231 | 7.620161153 | 2.929821508 | SLC16A5 | Up |
| ENSOCUG000000014345 | 11.27971398 | 3.495658581 | NHSL2   | Up |
| ENSOCUG000000014239 | 4.69420188  | 2.230879888 | TLCD4   | Up |
| ENSOCUG000000003846 | 5.924667201 | 2.566734117 | TRAM1L1 | Up |
| ENSOCUG000000025624 | 11.21297968 | 3.487097798 | GRIN2D  | Up |
| ENSOCUG000000010984 | 3.601492945 | 1.848595078 | -       | Up |
| ENSOCUG000000033151 | 6.916933261 | 2.790132537 | AOC3    | Up |
| ENSOCUG000000007799 | 3.360069563 | 1.748491101 | HOGA1   | Up |
| ENSOCUG000000017680 | 3.447781574 | 1.785668379 | INKA2   | Up |
| ENSOCUG000000008627 | 4.603609455 | 2.202765448 | SNCAIP  | Up |
| ENSOCUG000000003573 | 3.252887855 | 1.701721085 | TTYH3   | Up |



|                    |             |             |          |    |
|--------------------|-------------|-------------|----------|----|
| ENSOCUG00000005422 | 3.427972972 | 1.777355735 | SNAI1    | Up |
| ENSOCUG00000011697 | 19.19990906 | 4.263027573 | VCAM1    | Up |
| ENSOCUG00000008193 | 5.099512728 | 2.3503594   | ACTA2    | Up |
| ENSOCUG00000002349 | 4.519710119 | 2.176230245 | CFAP45   | Up |
| ENSOCUG00000013436 | 3.613773299 | 1.853506005 | NHS      | Up |
| ENSOCUG00000022649 | 5.13594167  | 2.360628818 | APLN     | Up |
| ENSOCUG00000008591 | 4.109077352 | 2.038814489 | ELAPOR1  | Up |
| ENSOCUG00000016140 | 20.68598635 | 4.370581844 | TBXAS1   | Up |
| ENSOCUG00000009504 | 5.047578033 | 2.335591309 | CD80     | Up |
| ENSOCUG00000024763 | 3.265962579 | 1.707508261 | TREX1    | Up |
| ENSOCUG00000005737 | 3.178014651 | 1.668125776 | LG MN    | Up |
| ENSOCUG00000001543 | 12.0044441  | 3.585496692 | FAM13C   | Up |
| ENSOCUG00000010668 | 3.149444363 | 1.655097325 | FKBP9    | Up |
| ENSOCUG00000001457 | Inf         | Inf         | MYF6     | Up |
| ENSOCUG00000026600 | Inf         | Inf         | ASIC4    | Up |
| ENSOCUG00000003712 | 5.325054185 | 2.412796205 | TCEAL9   | Up |
| ENSOCUG00000000157 | 4.389582257 | 2.134083649 | -        | Up |
| ENSOCUG00000013452 | 24.54123302 | 4.617135831 | PRTFDC1  | Up |
| ENSOCUG00000004091 | 3.266128004 | 1.707581333 | EPB41L1  | Up |
| ENSOCUG00000004115 | 3.275451719 | 1.711693883 | FCSK     | Up |
| ENSOCUG00000008485 | 3.243223278 | 1.697428349 | -        | Up |
| ENSOCUG00000010729 | 4.381742159 | 2.131504592 | RASL12   | Up |
| ENSOCUG00000008675 | 12.68492119 | 3.66504265  | -        | Up |
| ENSOCUG00000024398 | 3.175732842 | 1.667089551 | IFNAR2   | Up |
| ENSOCUG00000001828 | 3.163315037 | 1.661437242 | CERK     | Up |
| ENSOCUG00000006357 | 12.92030139 | 3.691567819 | ADAMTS12 | Up |
| ENSOCUG00000001107 | 9.200923304 | 3.201778641 | ARHGAP4  | Up |
| ENSOCUG00000015769 | 3.633666639 | 1.86142607  | RADIL    | Up |
| ENSOCUG00000003801 | 3.22140098  | 1.687688249 | CIQTNF1  | Up |
| ENSOCUG00000011085 | 11.70947511 | 3.549604502 | CTSS     | Up |
| ENSOCUG00000010063 | 3.243236971 | 1.69743444  | LRRC49   | Up |
| ENSOCUG00000009792 | 3.182309511 | 1.670074159 | NUMBL    | Up |
| ENSOCUG00000015113 | 3.125694211 | 1.644176645 | MTSS2    | Up |
| ENSOCUG00000011300 | 3.328108763 | 1.734702582 | CYP4V2   | Up |
| ENSOCUG00000023727 | 3.596190277 | 1.846469357 | LCAT     | Up |
| ENSOCUG00000002688 | 4.970335828 | 2.313343333 | ATP2A1   | Up |
| ENSOCUG00000008307 | 7.714197587 | 2.947516099 | -        | Up |
| ENSOCUG00000000111 | 3.724627694 | 1.897096224 | COL4A3   | Up |
| ENSOCUG00000002606 | 5.983480495 | 2.580984921 | HES7     | Up |
| ENSOCUG00000013587 | 3.675561364 | 1.877964608 | IL10RA   | Up |
| ENSOCUG00000025401 | 4.066457727 | 2.023772616 | PPP1R35  | Up |
| ENSOCUG00000023764 | 3.887248595 | 1.958749373 | CCDC80   | Up |
| ENSOCUG00000006107 | 5.713671809 | 2.514418171 | GRAMD2A  | Up |
| ENSOCUG00000006938 | 17.78568276 | 4.152644453 | CSDC2    | Up |

|                     |             |             |          |    |
|---------------------|-------------|-------------|----------|----|
| ENSOCUG00000026915  | 5.281962695 | 2.401074112 | PTGIR    | Up |
| ENSOCUG00000000596  | 3.219610931 | 1.686886359 | PLAAT3   | Up |
| ENSOCUG000000024679 | 3.225791019 | 1.689652977 | FKBP7    | Up |
| ENSOCUG00000016506  | 3.325053029 | 1.733377349 | PLXNB3   | Up |
| ENSOCUG00000001725  | 4.45982188  | 2.156986092 | PDGFRB   | Up |
| ENSOCUG00000026630  | 5.016368684 | 2.326643385 | -        | Up |
| ENSOCUG00000008163  | 3.225681004 | 1.689603774 | TAPBPL   | Up |
| ENSOCUG000000011141 | 3.379398046 | 1.75676629  | RET      | Up |
| ENSOCUG00000000435  | 3.994651828 | 1.998069764 | DAPK2    | Up |
| ENSOCUG00000008065  | 3.181416414 | 1.669669218 | NBL1     | Up |
| ENSOCUG00000001836  | 3.213520452 | 1.684154654 | ADGRL1   | Up |
| ENSOCUG00000006534  | 11.78394424 | 3.558750604 | -        | Up |
| ENSOCUG00000001897  | 3.248048268 | 1.699573072 | HEXD     | Up |
| ENSOCUG00000014363  | 3.48191061  | 1.799879166 | PCNX2    | Up |
| ENSOCUG00000010062  | 4.123646623 | 2.043920706 | DYSF     | Up |
| ENSOCUG00000002613  | 6.228850653 | 2.638965982 | VCAN     | Up |
| ENSOCUG00000013097  | 3.223424976 | 1.688594406 | C14orf93 | Up |
| ENSOCUG000000005816 | 3.11923167  | 1.641190708 | SORBS2   | Up |
| ENSOCUG000000005347 | 4.921582363 | 2.299122238 | PIF1     | Up |
| ENSOCUG00000002344  | 3.120956957 | 1.64198846  | SEMA3B   | Up |
| ENSOCUG00000017907  | 10.18333412 | 3.348138086 | TMEM37   | Up |
| ENSOCUG00000013393  | 4.0547361   | 2.019608021 | ZC4H2    | Up |
| ENSOCUG000000006085 | 9.823539656 | 3.296242956 | BBOX1    | Up |
| ENSOCUG000000007510 | 3.083508772 | 1.62457295  | LRIG1    | Up |
| ENSOCUG00000011961  | 16.6744111  | 4.059563905 | TMEM35A  | Up |
| ENSOCUG00000002177  | 4.229462604 | 2.080474366 | -        | Up |
| ENSOCUG00000021601  | 3.116525547 | 1.639938539 | SCARB1   | Up |
| ENSOCUG00000001759  | 3.047389637 | 1.607573974 | CDCA7    | Up |
| ENSOCUG00000002478  | 22.19239918 | 4.471993738 | -        | Up |
| ENSOCUG00000012053  | 3.092855417 | 1.628939393 | PPIC     | Up |
| ENSOCUG000000009621 | 8.068995481 | 3.012389082 | HSF2BP   | Up |
| ENSOCUG00000011549  | 2.998235156 | 1.584113541 | SPATS2L  | Up |
| ENSOCUG00000015020  | 4.032458084 | 2.011659537 | COL5A2   | Up |
| ENSOCUG00000016236  | 5.487228188 | 2.456077572 | COL15A1  | Up |
| ENSOCUG00000027853  | 7.8253089   | 2.968147703 | PGAM2    | Up |
| ENSOCUG000000031804 | 5.988685697 | 2.582239418 | -        | Up |
| ENSOCUG00000007870  | 6.798154442 | 2.765143138 | SCN5A    | Up |
| ENSOCUG000000003118 | 4.495991802 | 2.168639405 | SLC12A5  | Up |
| ENSOCUG00000033850  | 7.482623989 | 2.90354428  | -        | Up |
| ENSOCUG00000022123  | 11.13623515 | 3.477189675 | -        | Up |
| ENSOCUG00000001748  | 3.518104093 | 1.81479817  | TMTC1    | Up |
| ENSOCUG00000025803  | 6.308153106 | 2.657217676 | -        | Up |
| ENSOCUG00000027106  | 3.683189249 | 1.880955528 | HAS2     | Up |
| ENSOCUG00000024732  | 3.421531571 | 1.774642259 | TMEM143  | Up |

|                     |             |             |            |    |
|---------------------|-------------|-------------|------------|----|
| ENSOCUG00000016552  | 3.411470346 | 1.770393676 | TSPAN5     | Up |
| ENSOCUG00000013739  | 3.263527952 | 1.706432396 | FNDC4      | Up |
| ENSOCUG00000015623  | 3.064670052 | 1.615731759 | PLXNA3     | Up |
| ENSOCUG00000030668  | 5.075223022 | 2.343471221 | -          | Up |
| ENSOCUG00000002483  | 3.62893412  | 1.859545866 | NKIRAS1    | Up |
| ENSOCUG00000025690  | Inf         | Inf         | ART5       | Up |
| ENSOCUG00000013131  | 5.784019249 | 2.532072353 | MYOM2      | Up |
| ENSOCUG00000000637  | 3.720792165 | 1.895609807 | MYL9       | Up |
| ENSOCUG00000012443  | 8.181515999 | 3.032368193 | FAM189A1   | Up |
| ENSOCUG00000025172  | 5.152818107 | 2.365361667 | KCNK3      | Up |
| ENSOCUG00000006028  | 6.167203515 | 2.624616455 | NEURL3     | Up |
| ENSOCUG00000004165  | 2.954565605 | 1.562946034 | IRF1       | Up |
| ENSOCUG00000010565  | 11.72189987 | 3.551134514 | -          | Up |
| ENSOCUG000000006015 | 4.304077072 | 2.105703912 | HLX        | Up |
| ENSOCUG00000006133  | 4.406049171 | 2.139485595 | PLA2G6     | Up |
| ENSOCUG00000010061  | 10.56013687 | 3.400556629 | PLEKHG4    | Up |
| ENSOCUG00000011267  | 4.286463183 | 2.099787752 | -          | Up |
| ENSOCUG00000015301  | 3.55747528  | 1.830853732 | SCN1B      | Up |
| ENSOCUG00000007959  | 3.266637607 | 1.707806414 | PARD3B     | Up |
| ENSOCUG00000003227  | 60.07919802 | 5.90879365  | -          | Up |
| ENSOCUG00000009441  | 3.05362151  | 1.610521254 | DZIP1      | Up |
| ENSOCUG00000017194  | 23.44369099 | 4.551127822 | -          | Up |
| ENSOCUG00000024945  | Inf         | Inf         | -          | Up |
| ENSOCUG00000003348  | 3.237954157 | 1.69508256  | DMAC2L     | Up |
| ENSOCUG00000009521  | 3.065796845 | 1.6162621   | TCEAL8     | Up |
| ENSOCUG00000011332  | 8.786769833 | 3.135332903 | PACSIN1    | Up |
| ENSOCUG00000014263  | 8.39949457  | 3.070302518 | BATF2      | Up |
| ENSOCUG00000028226  | 11.45011868 | 3.517290646 | PABPC4L    | Up |
| ENSOCUG00000024772  | 3.027770023 | 1.598255628 | -          | Up |
| ENSOCUG00000025655  | 3.226818262 | 1.690112326 | GPR161     | Up |
| ENSOCUG00000020994  | 3.051131751 | 1.609344478 | ST6GALNAC4 | Up |
| ENSOCUG00000006120  | 27.33637365 | 4.772749967 | RGR        | Up |
| ENSOCUG00000003749  | 5.715164652 | 2.514795063 | PIANP      | Up |
| ENSOCUG00000007445  | 20.11379839 | 4.330113648 | -          | Up |
| ENSOCUG00000029638  | 7.998729382 | 2.999770842 | ANKRD34A   | Up |
| ENSOCUG00000004107  | 3.066337552 | 1.616516522 | ST3GAL2    | Up |
| ENSOCUG00000003063  | 3.075364124 | 1.620757236 | ALDH5A1    | Up |
| ENSOCUG00000004288  | 3.299317375 | 1.722167563 | LIMD2      | Up |
| ENSOCUG00000011556  | 3.149305151 | 1.655033554 | KCTD18     | Up |
| ENSOCUG00000017565  | 4.940675355 | 2.304708261 | KCP        | Up |
| ENSOCUG00000026917  | 3.10453861  | 1.634378874 | -          | Up |
| ENSOCUG00000005101  | 2.940817759 | 1.556217384 | LAMB2      | Up |
| ENSOCUG00000012094  | 3.361392925 | 1.749059194 | TRAM2      | Up |
| ENSOCUG00000024962  | 3.240711491 | 1.696310588 | -          | Up |

|                    |             |             |          |    |
|--------------------|-------------|-------------|----------|----|
| ENSOCUG00000004377 | 4.781756601 | 2.257540697 | -        | Up |
| ENSOCUG00000021745 | 3.59666297  | 1.846658976 | LHFPL2   | Up |
| ENSOCUG00000014497 | 9.282261344 | 3.214476318 | EFHD1    | Up |
| ENSOCUG00000002572 | 3.279229175 | 1.713356731 | LRRC3    | Up |
| ENSOCUG00000015498 | 4.22217608  | 2.077986746 | EFCAB11  | Up |
| ENSOCUG00000008651 | 8.812377808 | 3.139531348 | ITM2A    | Up |
| ENSOCUG00000012683 | 5.093052169 | 2.348530495 | ADAM33   | Up |
| ENSOCUG00000038697 | 21.59306554 | 4.43249617  | -        | Up |
| ENSOCUG00000009793 | 3.056074073 | 1.611679512 | RUSF1    | Up |
| ENSOCUG00000024791 | 2.971776902 | 1.571325814 | SLC25A1  | Up |
| ENSOCUG00000002852 | 3.251192648 | 1.700969045 | EMC9     | Up |
| ENSOCUG00000012396 | 2.987511995 | 1.578944506 | ZMYM3    | Up |
| ENSOCUG00000000911 | 3.213882408 | 1.684317144 | TBC1D16  | Up |
| ENSOCUG00000031846 | 10.73055362 | 3.423652606 | -        | Up |
| ENSOCUG00000009285 | 41.07593837 | 5.360221628 | C11orf53 | Up |
| ENSOCUG00000004928 | 4.542902303 | 2.18361428  | TGFBI    | Up |
| ENSOCUG00000003018 | 3.851680947 | 1.945488203 | LIX1L    | Up |
| ENSOCUG00000007886 | 4.078188957 | 2.027928622 | CYRIA    | Up |
| ENSOCUG00000013577 | 3.324511812 | 1.733142504 | -        | Up |
| ENSOCUG00000004334 | 4.310962189 | 2.108009909 | TMEM255A | Up |
| ENSOCUG00000008966 | 2.886607994 | 1.529375201 | P4HA2    | Up |
| ENSOCUG00000011228 | 2.942113748 | 1.556853025 | PDE4DIP  | Up |
| ENSOCUG00000007720 | 4.761404013 | 2.251387049 | QPRT     | Up |
| ENSOCUG00000022357 | 3.206861971 | 1.681162259 | PKD2     | Up |
| ENSOCUG00000000191 | 9.597615428 | 3.262676006 | YPEL4    | Up |
| ENSOCUG00000021126 | 3.032820572 | 1.600660148 | -        | Up |
| ENSOCUG00000007629 | 2.936985578 | 1.554336182 | P3H4     | Up |
| ENSOCUG00000016402 | 5.266905182 | 2.396955487 | CARMIL3  | Up |
| ENSOCUG00000021867 | 4.458440968 | 2.156539315 | UBE2L6   | Up |
| ENSOCUG00000034678 | 3.470835749 | 1.795283094 | ARMCX6   | Up |
| ENSOCUG00000014622 | 2.979640544 | 1.575138298 | -        | Up |
| ENSOCUG00000014102 | 3.02609989  | 1.597459611 | JCAD     | Up |
| ENSOCUG00000023383 | 3.1829959   | 1.670385299 | -        | Up |
| ENSOCUG00000013987 | 3.411865627 | 1.770560829 | FGF1     | Up |
| ENSOCUG00000008749 | 3.050970076 | 1.60926803  | TCF7L1   | Up |
| ENSOCUG00000027152 | 4.231881707 | 2.081299301 | -        | Up |
| ENSOCUG00000026304 | 8.772625612 | 3.1330087   | ECRG4    | Up |
| ENSOCUG00000009839 | 3.176833332 | 1.667589403 | HDAC11   | Up |
| ENSOCUG00000014724 | 3.11735735  | 1.640323544 | CMTM7    | Up |
| ENSOCUG00000010579 | 5.002570118 | 2.322669484 | ABAT     | Up |
| ENSOCUG00000027207 | 3.42150562  | 1.774631317 | FANCE    | Up |
| ENSOCUG00000023346 | 4.885158057 | 2.288405241 | ISG20    | Up |
| ENSOCUG00000011863 | 3.077581609 | 1.621797114 | HDHC2    | Up |
| ENSOCUG00000007913 | 3.058229377 | 1.612696617 | ZNF862   | Up |

|                      |             |             |          |    |
|----------------------|-------------|-------------|----------|----|
| ENSOCUG00000002323   | 3.096091156 | 1.630447949 | PATZ1    | Up |
| ENSOCUG00000005982   | 3.000266665 | 1.585090734 | B4GALT5  | Up |
| ENSOCUG000000014121  | Inf         | Inf         | B4GALNT1 | Up |
| ENSOCUG000000024383  | 2.874270686 | 1.523195935 | MIF      | Up |
| ENSOCUG00000003633   | 3.025272424 | 1.597065062 | GFRA1    | Up |
| ENSOCUG000000006104  | 9.639199576 | 3.268913352 | CFAP300  | Up |
| ENSOCUG000000013478  | 2.878300309 | 1.525217124 | HTRA1    | Up |
| ENSOCUG000000005758  | 3.061917158 | 1.61443525  | ARL4C    | Up |
| ENSOCUG000000001241  | 3.996580185 | 1.998766035 | MFSD4A   | Up |
| ENSOCUG000000026440  | 2.987338575 | 1.578860757 | -        | Up |
| ENSOCUG000000011881  | 3.45574248  | 1.788995713 | RGS7     | Up |
| ENSOCUG000000008670  | 5.978200953 | 2.579711393 | SSTR1    | Up |
| ENSOCUG000000014873  | 2.893111868 | 1.532622109 | -        | Up |
| ENSOCUG000000001254  | 3.108978298 | 1.636440546 | CLTCL1   | Up |
| ENSOCUG000000029212  | 3.134703875 | 1.648329163 | -        | Up |
| ENSOCUG000000003523  | 8.917761517 | 3.156681619 | SYT6     | Up |
| ENSOCUG000000006763  | 2.97638908  | 1.573563131 | -        | Up |
| ENSOCUG000000014939  | 3.182613754 | 1.67021208  | PCED1A   | Up |
| ENSOCUG000000021091  | 3.068648584 | 1.617603441 | SLC5A2   | Up |
| ENSOCUG000000024974  | 3.207534869 | 1.681464949 | NT5C     | Up |
| ENSOCUG000000003299  | 3.483851894 | 1.800683293 | DMRT2    | Up |
| ENSOCUG000000007808  | 3.030549508 | 1.599579411 | CAVIN3   | Up |
| ENSOCUG000000010987  | 5.782359212 | 2.531658235 | TMEM26   | Up |
| ENSOCUG0000000033836 | 3.215241934 | 1.684927299 | HSD17B14 | Up |
| ENSOCUG000000017533  | 3.033853332 | 1.601151342 | CLN6     | Up |
| ENSOCUG000000015812  | 2.968594648 | 1.569780111 | PRPSAP2  | Up |
| ENSOCUG000000002692  | 5.35908861  | 2.421987671 | GRIK4    | Up |
| ENSOCUG000000012530  | 4.362884943 | 2.125282428 | NPNT     | Up |
| ENSOCUG000000001137  | 3.128517913 | 1.645479365 | LHFPL6   | Up |
| ENSOCUG000000028091  | 4.151113432 | 2.053498355 | THNSL2   | Up |
| ENSOCUG000000016259  | 5.791417937 | 2.533916612 | DDIT4L   | Up |
| ENSOCUG000000014083  | 3.025937564 | 1.59738222  | LZTS1    | Up |
| ENSOCUG000000014657  | 3.175751507 | 1.66709803  | EFEMP1   | Up |
| ENSOCUG000000013016  | 5.011857154 | 2.325345296 | MAPK4    | Up |
| ENSOCUG000000000798  | 3.6628223   | 1.872955711 | H6PD     | Up |
| ENSOCUG000000005192  | 4.418165649 | 2.14344751  | TLCD5    | Up |
| ENSOCUG000000000148  | 3.788965975 | 1.921804185 | CDO1     | Up |
| ENSOCUG000000022982  | 3.084147011 | 1.624871535 | D2HGDH   | Up |
| ENSOCUG000000013025  | 3.339033471 | 1.739430555 | NAGS     | Up |
| ENSOCUG000000024302  | 4.01045916  | 2.003767421 | LGALS1   | Up |
| ENSOCUG000000008772  | 35.78374296 | 5.161232395 | FANK1    | Up |
| ENSOCUG000000000259  | 4.356678048 | 2.123228504 | -        | Up |
| ENSOCUG000000012995  | 4.215180628 | 2.075594455 | MERTK    | Up |
| ENSOCUG000000009440  | 3.016267603 | 1.59276443  | LRP3     | Up |

|                     |             |             |         |    |
|---------------------|-------------|-------------|---------|----|
| ENSOCUG00000008107  | Inf         | Inf         | -       | Up |
| ENSOCUG00000022428  | 3.877500033 | 1.955126793 | POLM    | Up |
| ENSOCUG000000025617 | 2.86237925  | 1.517214834 | CDH13   | Up |
| ENSOCUG00000007855  | 3.039200773 | 1.603691984 | PXYLP1  | Up |
| ENSOCUG00000011364  | 3.529145833 | 1.819319047 | -       | Up |
| ENSOCUG00000010446  | 2.965786502 | 1.568414746 | ATG16L2 | Up |
| ENSOCUG00000022291  | 5.508540136 | 2.461670029 | -       | Up |
| ENSOCUG000000009508 | 2.77434226  | 1.472145778 | ADPRH   | Up |
| ENSOCUG00000010198  | 3.208066223 | 1.681703923 | Tpm2    | Up |
| ENSOCUG00000016065  | 5.81470382  | 2.539705708 | PITX3   | Up |
| ENSOCUG00000002861  | 2.792545843 | 1.481580965 | -       | Up |
| ENSOCUG00000012645  | 3.142278095 | 1.651810866 | MECR    | Up |
| ENSOCUG00000007479  | 3.38477681  | 1.759060707 | PDE3A   | Up |
| ENSOCUG00000002118  | 3.182122942 | 1.669989576 | GPR176  | Up |
| ENSOCUG00000002254  | 2.749423773 | 1.459129289 | DNMBP   | Up |
| ENSOCUG00000010075  | 3.460028879 | 1.790784079 | TRABD2A | Up |
| ENSOCUG00000021527  | 5.081125501 | 2.345148098 | -       | Up |
| ENSOCUG000000002760 | 3.360864493 | 1.748832376 | HIP1    | Up |
| ENSOCUG00000033676  | 2.848967629 | 1.510439229 | SELENOM | Up |
| ENSOCUG00000028002  | 3.020278406 | 1.594681542 | MDP1    | Up |
| ENSOCUG00000002220  | 2.902899012 | 1.537494383 | P2RX4   | Up |
| ENSOCUG00000017737  | 20.31624468 | 4.344561849 | P2RX2   | Up |
| ENSOCUG000000005589 | 4.900863252 | 2.293035892 | ZAN     | Up |
| ENSOCUG000000008644 | 4.861560934 | 2.281419604 | -       | Up |
| ENSOCUG00000037987  | 3.984388184 | 1.99435821  | -       | Up |
| ENSOCUG000000005593 | 2.768418212 | 1.469061901 | FXVD6   | Up |
| ENSOCUG00000012397  | 2.774614545 | 1.472287363 | TSC22D3 | Up |
| ENSOCUG000000023580 | 4.104643376 | 2.037256882 | ITPKA   | Up |
| ENSOCUG00000017372  | 3.968990198 | 1.988771999 | KLHL29  | Up |
| ENSOCUG00000015477  | 7.514883048 | 2.909750652 | -       | Up |
| ENSOCUG00000026783  | 2.90779441  | 1.53992527  | PCGF2   | Up |
| ENSOCUG00000005457  | 3.102456166 | 1.633410827 | SLC27A3 | Up |
| ENSOCUG00000011193  | 2.906851651 | 1.539457447 | SYTL4   | Up |
| ENSOCUG00000030256  | 9.104044083 | 3.186507543 | TET1    | Up |
| ENSOCUG00000005145  | 3.534657743 | 1.821570527 | EEPD1   | Up |
| ENSOCUG00000002624  | Inf         | Inf         | NRK     | Up |
| ENSOCUG00000017891  | 2.794246035 | 1.482459056 | SLC29A1 | Up |
| ENSOCUG000000022140 | 4.172750531 | 2.060998671 | SAMD14  | Up |
| ENSOCUG00000030033  | 3.308365991 | 1.726118843 | -       | Up |
| ENSOCUG00000000612  | 18.45105945 | 4.205631753 | CD101   | Up |
| ENSOCUG00000025048  | 6.657627785 | 2.735008214 | CXCR5   | Up |
| ENSOCUG00000003436  | 4.541824857 | 2.183272074 | SPTBN4  | Up |
| ENSOCUG00000024266  | 3.78233517  | 1.919277213 | PLEKHH2 | Up |
| ENSOCUG00000008662  | 3.152187394 | 1.656353304 | KHK     | Up |

|                     |             |             |          |    |
|---------------------|-------------|-------------|----------|----|
| ENSOCUG00000003499  | 3.05663725  | 1.611945101 | FADS2    | Up |
| ENSOCUG00000023813  | 2.924847915 | 1.54836161  | -        | Up |
| ENSOCUG00000016264  | 10.6887348  | 3.41801919  | ENPEP    | Up |
| ENSOCUG00000022621  | 4.979678266 | 2.316052534 | KLHL33   | Up |
| ENSOCUG00000005985  | 2.74092735  | 1.454664089 | CLU      | Up |
| ENSOCUG00000000249  | 4.231843302 | 2.081286208 | SMARCD3  | Up |
| ENSOCUG00000005650  | 3.583480489 | 1.841361499 | FRAT1    | Up |
| ENSOCUG000000034490 | 3.326000094 | 1.733788209 | NREP     | Up |
| ENSOCUG00000025954  | 7.218194831 | 2.851638084 | INPP5D   | Up |
| ENSOCUG00000003991  | 2.930845307 | 1.551316823 | DZIP1L   | Up |
| ENSOCUG00000009427  | 3.381108044 | 1.757496119 | LAMA2    | Up |
| ENSOCUG00000000431  | 4.754664119 | 2.249343429 | CRABP1   | Up |
| ENSOCUG00000022861  | 5.032982734 | 2.331413649 | FBXO24   | Up |
| ENSOCUG00000026037  | 3.379339171 | 1.756741155 | GNB1L    | Up |
| ENSOCUG00000016208  | 3.02556223  | 1.597203258 | NAXE     | Up |
| ENSOCUG00000015071  | 4.734162741 | 2.243109301 | ALDH1L1  | Up |
| ENSOCUG00000004122  | 2.778605809 | 1.474361179 | NIPSNAP1 | Up |
| ENSOCUG000000004710 | 2.782065493 | 1.476156383 | -        | Up |
| ENSOCUG00000013280  | 2.837015414 | 1.504373989 | ARHGEF3  | Up |
| ENSOCUG00000015845  | 2.787851065 | 1.47915349  | RHOBTB3  | Up |
| ENSOCUG00000012908  | 3.751005849 | 1.907277513 | DNM1     | Up |
| ENSOCUG00000008690  | 2.948599387 | 1.560029823 | TMCO4    | Up |
| ENSOCUG00000025890  | 3.756702284 | 1.909466788 | -        | Up |
| ENSOCUG00000001761  | 9.125564564 | 3.189913816 | -        | Up |
| ENSOCUG00000026610  | 10.5696866  | 3.401860695 | TMEM100  | Up |
| ENSOCUG00000016671  | 3.158972887 | 1.659455555 | VANGL2   | Up |
| ENSOCUG00000031627  | 2.92862678  | 1.55022435  | -        | Up |
| ENSOCUG00000016361  | 4.431623624 | 2.147835359 | CD302    | Up |
| ENSOCUG00000000371  | 3.832709475 | 1.938364644 | TTC38    | Up |
| ENSOCUG00000017020  | 2.842328736 | 1.507073422 | SRD5A1   | Up |
| ENSOCUG00000002250  | 3.24197691  | 1.696873816 | GGT7     | Up |
| ENSOCUG00000005088  | 2.759641602 | 1.464480914 | -        | Up |
| ENSOCUG00000005005  | 3.113145236 | 1.638372884 | RFX2     | Up |
| ENSOCUG00000002848  | 8.920436465 | 3.157114301 | -        | Up |
| ENSOCUG00000005660  | 3.058550293 | 1.612847999 | PDGFA    | Up |
| ENSOCUG00000009435  | 4.086576435 | 2.030892719 | XKR5     | Up |
| ENSOCUG00000011941  | 3.446350107 | 1.785069269 | HVCN1    | Up |
| ENSOCUG00000000109  | 3.457758454 | 1.789837091 | ADAMTS9  | Up |
| ENSOCUG00000007211  | 4.30184592  | 2.104955853 | -        | Up |
| ENSOCUG00000029210  | 2.992135235 | 1.581175382 | AP5B1    | Up |
| ENSOCUG00000033970  | 7.67728734  | 2.940596645 | -        | Up |
| ENSOCUG00000010761  | 6.987051646 | 2.804683804 | NPY      | Up |
| ENSOCUG00000000349  | 3.57617327  | 1.838416639 | TRIM46   | Up |
| ENSOCUG00000008272  | 4.569978164 | 2.192187272 | SRPX     | Up |

|                    |             |             |          |    |
|--------------------|-------------|-------------|----------|----|
| ENSOCUG00000008000 | 3.318013866 | 1.730319915 | B9D2     | Up |
| ENSOCUG00000008953 | 4.171500755 | 2.060566507 | SYNPO2   | Up |
| ENSOCUG00000016445 | 3.640169365 | 1.864005576 | -        | Up |
| ENSOCUG00000021153 | 6.59350425  | 2.721045418 | MAP3K7CL | Up |
| ENSOCUG00000014520 | 2.592652719 | 1.374428973 | CAV1     | Up |
| ENSOCUG00000011893 | 2.81921227  | 1.495292108 | GNB5     | Up |
| ENSOCUG00000006343 | 6.677703683 | 2.739352076 | KLF9     | Up |
| ENSOCUG00000025224 | 2.726765899 | 1.447190846 | LIMK1    | Up |
| ENSOCUG00000013700 | 2.725981403 | 1.44677572  | CTSF     | Up |
| ENSOCUG00000008183 | 3.443199017 | 1.783749571 | HS6ST2   | Up |
| ENSOCUG00000016170 | 2.735412305 | 1.451758305 | PYGO2    | Up |
| ENSOCUG00000013520 | 2.862606287 | 1.517329261 | NR2F2    | Up |
| ENSOCUG00000026468 | 3.023561212 | 1.596248787 | BDKRB1   | Up |
| ENSOCUG00000007382 | 3.986643442 | 1.995174579 | INHBE    | Up |
| ENSOCUG00000005228 | 4.695656122 | 2.231326759 | NKD1     | Up |
| ENSOCUG00000000553 | 3.736637803 | 1.901740728 | TCEAL1   | Up |
| ENSOCUG00000005747 | 4.235035147 | 2.082373943 | COL16A1  | Up |
| ENSOCUG00000000459 | 2.797532706 | 1.484154998 | -        | Up |
| ENSOCUG00000022727 | 3.031764003 | 1.600157457 | -        | Up |
| ENSOCUG00000012806 | 3.664078297 | 1.873450333 | RGS14    | Up |
| ENSOCUG00000014010 | 15.69132599 | 3.971895367 | OR51E1   | Up |
| ENSOCUG00000021051 | 18.37568169 | 4.199725866 | RIPPLY3  | Up |
| ENSOCUG00000010550 | 3.096898341 | 1.630824026 | B3GALT4  | Up |
| ENSOCUG00000002846 | 2.67154155  | 1.417672455 | PSME1    | Up |
| ENSOCUG00000010721 | 11.74870124 | 3.554429377 | LRRC71   | Up |
| ENSOCUG00000022195 | Inf         | Inf         | -        | Up |
| ENSOCUG00000012120 | 6.2545312   | 2.644901753 | SPARC    | Up |
| ENSOCUG00000017325 | 4.451893948 | 2.154419226 | KCNAB3   | Up |
| ENSOCUG00000023031 | 2.908191374 | 1.540122209 | -        | Up |
| ENSOCUG00000009849 | 2.759104494 | 1.464200096 | GLT8D1   | Up |
| ENSOCUG00000009421 | 28.65509124 | 4.840719585 | -        | Up |
| ENSOCUG00000016636 | 2.920024536 | 1.545980492 | TMEM8B   | Up |
| ENSOCUG00000006306 | 2.732754548 | 1.450355885 | PINK1    | Up |
| ENSOCUG00000014637 | 2.70843506  | 1.4374595   | -        | Up |
| ENSOCUG00000012456 | 2.758420535 | 1.46384242  | ZNF362   | Up |
| ENSOCUG00000014492 | 2.782046212 | 1.476146385 | IRAK3    | Up |
| ENSOCUG00000017857 | 3.752639713 | 1.907905785 | BICD1    | Up |
| ENSOCUG00000007900 | 2.878216453 | 1.525175093 | RCOR2    | Up |
| ENSOCUG00000027662 | 3.63449352  | 1.861754333 | C16orf71 | Up |
| ENSOCUG00000026867 | 2.869415302 | 1.52075679  | LTK      | Up |
| ENSOCUG00000012081 | 2.870195527 | 1.521149022 | CACNB1   | Up |
| ENSOCUG00000003626 | 11.83562129 | 3.565063534 | KIAA2012 | Up |
| ENSOCUG00000026221 | 3.783474367 | 1.919711671 | -        | Up |
| ENSOCUG00000001144 | 2.635409338 | 1.398027062 | SLC6A6   | Up |



|                     |             |             |          |    |
|---------------------|-------------|-------------|----------|----|
| ENSOCUG00000024729  | 3.502445053 | 1.808362418 | HSPB3    | Up |
| ENSOCUG00000006524  | 3.039966839 | 1.604055586 | BMF      | Up |
| ENSOCUG00000000114  | 4.208989006 | 2.073473741 | DUSP2    | Up |
| ENSOCUG00000002875  | 16.831433   | 4.073086105 | STOX1    | Up |
| ENSOCUG00000012841  | 5.262926754 | 2.395865316 | -        | Up |
| ENSOCUG00000001963  | 2.908993313 | 1.54051998  | TNS1     | Up |
| ENSOCUG00000025982  | 2.645457443 | 1.403517209 | -        | Up |
| ENSOCUG00000013207  | 2.700460247 | 1.433205311 | POU6F1   | Up |
| ENSOCUG00000012353  | 8.344057993 | 3.060749185 | SDSL     | Up |
| ENSOCUG00000005605  | 2.957713549 | 1.564482336 | LDLRAD4  | Up |
| ENSOCUG00000005365  | 2.766812336 | 1.468224794 | -        | Up |
| ENSOCUG00000002563  | 2.834878613 | 1.503286962 | -        | Up |
| ENSOCUG00000016500  | 2.694614625 | 1.430078958 | -        | Up |
| ENSOCUG00000017021  | 6.593114929 | 2.72096023  | -        | Up |
| ENSOCUG00000010783  | 4.140515876 | 2.049810528 | STARD8   | Up |
| ENSOCUG00000034268  | 4.09081878  | 2.032389628 | -        | Up |
| ENSOCUG00000025336  | 2.621095887 | 1.390170132 | PCBP4    | Up |
| ENSOCUG000000022093 | 3.45149886  | 1.787223008 | ACAN     | Up |
| ENSOCUG00000006503  | 2.622783625 | 1.391098793 | TBC1D2B  | Up |
| ENSOCUG00000009277  | 3.003443525 | 1.586617537 | RND2     | Up |
| ENSOCUG00000013208  | 2.826913211 | 1.499227591 | PRXL2C   | Up |
| ENSOCUG00000026916  | 2.746969358 | 1.457840817 | GTF2IRD1 | Up |
| ENSOCUG00000000404  | 2.601178365 | 1.37916533  | CABIN1   | Up |
| ENSOCUG00000006348  | 2.921246394 | 1.546584048 | PSMB10   | Up |
| ENSOCUG00000016069  | 2.625008614 | 1.392322157 | RNF144A  | Up |
| ENSOCUG00000005798  | 4.974075383 | 2.314428372 | GALNT14  | Up |
| ENSOCUG00000027757  | 2.638734374 | 1.39984613  | CMTM3    | Up |
| ENSOCUG00000011879  | 6.587248026 | 2.719675872 | KLHL31   | Up |
| ENSOCUG00000011355  | 2.598689788 | 1.377784426 | SCPEP1   | Up |
| ENSOCUG00000009728  | 2.641001217 | 1.401084966 | THRA     | Up |
| ENSOCUG00000010021  | 4.063772898 | 2.02281978  | CMPK2    | Up |
| ENSOCUG00000023927  | 4.476230132 | 2.16228421  | -        | Up |
| ENSOCUG00000001933  | 2.76550516  | 1.467543034 | PTPRJ    | Up |
| ENSOCUG00000036279  | 3.152110992 | 1.656318336 | -        | Up |
| ENSOCUG00000003185  | 2.569856946 | 1.361688052 | CSPG4    | Up |
| ENSOCUG00000006316  | 2.659883156 | 1.411362872 | PLEKHO1  | Up |
| ENSOCUG00000021257  | 8.409227198 | 3.071973224 | MATN3    | Up |
| ENSOCUG00000012750  | 3.06262413  | 1.614768319 | BRSK1    | Up |
| ENSOCUG00000001465  | 3.815367319 | 1.931821957 | PAPPA    | Up |
| ENSOCUG00000012721  | 2.581790745 | 1.368372074 | DAB2     | Up |
| ENSOCUG00000014110  | 2.883808571 | 1.527975401 | -        | Up |
| ENSOCUG00000023020  | 2.812941492 | 1.492079546 | -        | Up |
| ENSOCUG00000021002  | 2.69329777  | 1.429373742 | LCN2     | Up |
| ENSOCUG00000011942  | 3.907597725 | 1.966281954 | FLNC     | Up |

|                     |             |             |          |    |
|---------------------|-------------|-------------|----------|----|
| ENSOCUG00000003215  | 4.15032289  | 2.053223581 | SPRY4    | Up |
| ENSOCUG00000022585  | 3.037399232 | 1.602836547 | PRKD1    | Up |
| ENSOCUG00000011825  | 2.714207276 | 1.4405309   | ZDHHC1   | Up |
| ENSOCUG00000011582  | 3.312564971 | 1.727948751 | MPP2     | Up |
| ENSOCUG00000014001  | Inf         | Inf         | CYYR1    | Up |
| ENSOCUG00000007624  | 11.32553845 | 3.501507736 | PRKCG    | Up |
| ENSOCUG00000027310  | 2.52729125  | 1.337591933 | SLC16A3  | Up |
| ENSOCUG000000003905 | 2.709909571 | 1.43824471  | CCN1     | Up |
| ENSOCUG00000012465  | 2.633659935 | 1.397069073 | TSPAN31  | Up |
| ENSOCUG00000005447  | 2.558741177 | 1.355434223 | DENND2B  | Up |
| ENSOCUG00000021283  | 3.679291918 | 1.879428145 | -        | Up |
| ENSOCUG00000000865  | 2.927016632 | 1.549430943 | ARSL     | Up |
| ENSOCUG00000014601  | 2.817748387 | 1.494542791 | -        | Up |
| ENSOCUG00000011970  | 3.357705856 | 1.747475852 | -        | Up |
| ENSOCUG00000008769  | 3.138025269 | 1.64985697  | PCDHAC2  | Up |
| ENSOCUG00000009108  | 2.747807277 | 1.458280821 | -        | Up |
| ENSOCUG00000037070  | 6.014751866 | 2.588505221 | -        | Up |
| ENSOCUG00000017267  | 2.691950271 | 1.428651759 | SLC37A4  | Up |
| ENSOCUG00000012700  | 2.771124188 | 1.470471367 | CORO6    | Up |
| ENSOCUG00000016223  | 2.704076816 | 1.435136136 | -        | Up |
| ENSOCUG00000021012  | 3.167830702 | 1.663495236 | -        | Up |
| ENSOCUG00000008198  | 2.892301585 | 1.532217992 | -        | Up |
| ENSOCUG00000000804  | 3.07892785  | 1.622428061 | SCRN1    | Up |
| ENSOCUG00000002065  | 2.547327504 | 1.348984456 | TCAF1    | Up |
| ENSOCUG00000010232  | 3.956005584 | 1.984044463 | ANTXR1   | Up |
| ENSOCUG00000007657  | 2.745584131 | 1.457113119 | FAM174A  | Up |
| ENSOCUG00000024073  | 2.66428467  | 1.413748238 | -        | Up |
| ENSOCUG000000003689 | 3.390995759 | 1.76170898  | NID2     | Up |
| ENSOCUG00000016624  | 2.519358748 | 1.333056572 | MYH10    | Up |
| ENSOCUG00000023456  | 4.682800992 | 2.227371728 | -        | Up |
| ENSOCUG00000001428  | 2.628433955 | 1.394203485 | PDE4A    | Up |
| ENSOCUG00000038840  | 2.646094204 | 1.403864424 | -        | Up |
| ENSOCUG00000024530  | 5.373088254 | 2.425751535 | APOC1    | Up |
| ENSOCUG00000010547  | 3.416557989 | 1.772543614 | HLF      | Up |
| ENSOCUG00000021420  | 5.21001637  | 2.381287906 | -        | Up |
| ENSOCUG00000032092  | 4.789962917 | 2.260014487 | -        | Up |
| ENSOCUG00000005927  | 2.668834612 | 1.416209904 | ACSM5    | Up |
| ENSOCUG000000009174 | 14.53599859 | 3.86155828  | CDHR4    | Up |
| ENSOCUG00000002066  | 2.971416109 | 1.57115065  | C11orf49 | Up |
| ENSOCUG00000010871  | 3.391673934 | 1.76199748  | DNALI1   | Up |
| ENSOCUG00000000236  | 2.792582523 | 1.481599914 | RGMA     | Up |
| ENSOCUG00000012486  | 3.143949135 | 1.652577877 | CYP27B1  | Up |
| ENSOCUG00000008744  | 2.687850582 | 1.42645294  | TMEM205  | Up |
| ENSOCUG00000014089  | 2.621472708 | 1.390377526 | PLD1     | Up |

|                     |             |             |          |    |
|---------------------|-------------|-------------|----------|----|
| ENSOCUG00000009881  | 2.923805394 | 1.54784729  | EML1     | Up |
| ENSOCUG00000014920  | 2.637408016 | 1.399120779 | SPRY1    | Up |
| ENSOCUG00000002287  | 3.245766661 | 1.698559288 | -        | Up |
| ENSOCUG000000024007 | 4.664080512 | 2.221592693 | WNT6     | Up |
| ENSOCUG00000009447  | 2.824871226 | 1.498185103 | OSBPL7   | Up |
| ENSOCUG000000027846 | 2.937681613 | 1.554678045 | DNAJB5   | Up |
| ENSOCUG00000014618  | 2.700923166 | 1.4334526   | RGS10    | Up |
| ENSOCUG000000004455 | 5.387603526 | 2.429643687 | GUCY1A1  | Up |
| ENSOCUG000000022079 | 9.599051357 | 3.262891836 | ANKRD55  | Up |
| ENSOCUG00000015713  | 2.602691031 | 1.380004058 | TMEM132A | Up |
| ENSOCUG000000009751 | 5.755206843 | 2.52486778  | HCK      | Up |
| ENSOCUG000000029419 | 3.249336892 | 1.70014533  | -        | Up |
| ENSOCUG000000001360 | 4.764151585 | 2.252219317 | GAB3     | Up |
| ENSOCUG000000004558 | 3.324145927 | 1.732983716 | PCDHB5   | Up |
| ENSOCUG000000034254 | 4.209773043 | 2.073742457 | ZSCAN2   | Up |
| ENSOCUG000000027233 | 3.759403171 | 1.910503643 | -        | Up |
| ENSOCUG000000037568 | 31.07405842 | 4.957638772 | -        | Up |
| ENSOCUG000000007401 | 2.57737478  | 1.365902337 | CACNB3   | Up |
| ENSOCUG000000024203 | 3.120530342 | 1.641791239 | SLC2A10  | Up |
| ENSOCUG000000005640 | 3.649763918 | 1.867803147 | -        | Up |
| ENSOCUG000000002281 | 3.520177099 | 1.815648012 | CYP2U1   | Up |
| ENSOCUG00000014331  | 4.251676646 | 2.088031879 | -        | Up |
| ENSOCUG000000009989 | 2.741897211 | 1.455174488 | AZIN2    | Up |
| ENSOCUG000000026210 | 2.548355725 | 1.349566678 | ORAI3    | Up |
| ENSOCUG00000001436  | 3.327289027 | 1.734347192 | MAOB     | Up |
| ENSOCUG00000010739  | 10.52007867 | 3.395073588 | SSPN     | Up |
| ENSOCUG000000037591 | 2.505738347 | 1.325235774 | -        | Up |
| ENSOCUG000000009677 | 2.482617789 | 1.311862169 | MYADM    | Up |
| ENSOCUG00000012213  | 3.432617533 | 1.779309119 | DYNC1I1  | Up |
| ENSOCUG000000026428 | 2.723186309 | 1.445295689 | GHDC     | Up |
| ENSOCUG000000006320 | 2.512072007 | 1.328877819 | SMARCA2  | Up |
| ENSOCUG000000005548 | 4.811739678 | 2.266558593 | AMIGO1   | Up |
| ENSOCUG000000006727 | 3.95821828  | 1.984851174 | NRSN2    | Up |
| ENSOCUG00000014527  | 2.705714125 | 1.436009418 | CTSC     | Up |
| ENSOCUG000000021637 | 2.546214409 | 1.34835391  | -        | Up |
| ENSOCUG000000024025 | 2.912319805 | 1.542168788 | CSKMT    | Up |
| ENSOCUG00000015269  | 2.932314413 | 1.552039803 | ADAP2    | Up |
| ENSOCUG00000016289  | 4.160399878 | 2.0567222   | HPGD     | Up |
| ENSOCUG00000010809  | 2.817113322 | 1.494217599 | CTC1     | Up |
| ENSOCUG00000017793  | 4.643241525 | 2.215132327 | -        | Up |
| ENSOCUG000000008718 | 2.645278438 | 1.403419586 | TMEM231  | Up |
| ENSOCUG000000021984 | 10.93391731 | 3.450738465 | C1QL4    | Up |
| ENSOCUG000000023782 | 2.561747347 | 1.357128196 | -        | Up |
| ENSOCUG000000006073 | 2.519182702 | 1.332955756 | -        | Up |

|                    |             |             |         |    |
|--------------------|-------------|-------------|---------|----|
| ENSOCUG00000010930 | 3.321494738 | 1.731832629 | -       | Up |
| ENSOCUG00000015952 | Inf         | Inf         | TIMP4   | Up |
| ENSOCUG00000035124 | 4.360716628 | 2.124565243 | -       | Up |
| ENSOCUG00000001723 | 4.311128261 | 2.108065485 | ZFHX4   | Up |
| ENSOCUG00000016171 | 2.871510002 | 1.521809587 | CDH23   | Up |
| ENSOCUG00000005109 | 3.869074707 | 1.951988586 | -       | Up |
| ENSOCUG00000023958 | 3.522401085 | 1.816559194 | IL1B    | Up |
| ENSOCUG00000007710 | 17.62016022 | 4.139155138 | SCTR    | Up |
| ENSOCUG00000013015 | 2.604487327 | 1.380999417 | IFT122  | Up |
| ENSOCUG00000011771 | 2.59597729  | 1.376277763 | DENND4B | Up |
| ENSOCUG00000011919 | 3.855740255 | 1.947007867 | SEMA3A  | Up |
| ENSOCUG00000004294 | 18.0605791  | 4.174772248 | NKX3-1  | Up |
| ENSOCUG00000008707 | 3.683936664 | 1.881248258 | RTL5    | Up |
| ENSOCUG00000008776 | Inf         | Inf         | FBXO43  | Up |
| ENSOCUG00000032921 | 3.160571882 | 1.660185627 | -       | Up |
| ENSOCUG00000005696 | 2.900409336 | 1.536256523 | -       | Up |
| ENSOCUG00000011092 | 3.183462881 | 1.670596943 | FLT4    | Up |
| ENSOCUG00000002289 | 2.496304202 | 1.319793753 | -       | Up |
| ENSOCUG00000014904 | 2.44753075  | 1.291326985 | EPAS1   | Up |
| ENSOCUG00000004841 | 3.560487601 | 1.832074829 | DKK3    | Up |
| ENSOCUG00000004426 | 2.834405702 | 1.503046273 | SOGA1   | Up |
| ENSOCUG00000027124 | 2.492005822 | 1.317307439 | RABAC1  | Up |
| ENSOCUG00000005063 | 2.452876019 | 1.294474314 | MXD4    | Up |
| ENSOCUG00000003993 | 6.856451142 | 2.777462039 | RFTN2   | Up |
| ENSOCUG00000001937 | 2.43891209  | 1.286237758 | ARHGEF2 | Up |
| ENSOCUG00000029037 | 3.57360295  | 1.837379351 | -       | Up |
| ENSOCUG00000022849 | 2.554599689 | 1.353097236 | COPG2   | Up |
| ENSOCUG00000006352 | 3.10834266  | 1.636145554 | FOXRED2 | Up |
| ENSOCUG00000012203 | 4.024984631 | 2.008983274 | SGSM1   | Up |
| ENSOCUG00000000256 | 3.260382998 | 1.705041448 | PTPDC1  | Up |
| ENSOCUG00000006955 | 2.580606826 | 1.367710353 | DNAJC18 | Up |
| ENSOCUG00000004155 | 8.597215632 | 3.103869492 | ACOX2   | Up |
| ENSOCUG00000036162 | 3.836058849 | 1.939624853 | -       | Up |
| ENSOCUG00000006599 | 2.545259114 | 1.347812534 | TAF10   | Up |
| ENSOCUG00000012178 | 2.602201482 | 1.37973267  | SIMC1   | Up |
| ENSOCUG00000006299 | 2.697207302 | 1.431466409 | ARVCF   | Up |
| ENSOCUG00000006022 | 2.757857458 | 1.463547892 | MINDY4  | Up |
| ENSOCUG00000026025 | 4.227303184 | 2.079737587 | CCDC65  | Up |
| ENSOCUG00000008200 | 4.470993738 | 2.160595525 | ALOX5AP | Up |
| ENSOCUG00000025564 | 3.049157247 | 1.608410553 | PROCA1  | Up |
| ENSOCUG00000003773 | 3.661323114 | 1.872365098 | DTNA    | Up |
| ENSOCUG00000007393 | 2.571386684 | 1.362546579 | -       | Up |
| ENSOCUG00000012485 | 2.503625684 | 1.324018882 | -       | Up |
| ENSOCUG00000012046 | 2.638858245 | 1.399913854 | SNX24   | Up |

|                     |             |             |          |    |
|---------------------|-------------|-------------|----------|----|
| ENSOCUG00000007084  | 3.041200277 | 1.604640828 | CHRD     | Up |
| ENSOCUG00000002450  | Inf         | Inf         | GRM4     | Up |
| ENSOCUG00000009911  | 2.798027669 | 1.484410229 | SLC9A9   | Up |
| ENSOCUG00000014435  | 3.333844827 | 1.737186956 | CFAP126  | Up |
| ENSOCUG00000002215  | 15.40600046 | 3.945420469 | BEX5     | Up |
| ENSOCUG000000022794 | 2.782950061 | 1.47661502  | F2R      | Up |
| ENSOCUG00000001467  | 2.433698831 | 1.283150646 | DLC1     | Up |
| ENSOCUG000000021680 | 2.694444516 | 1.429987879 | NUDT16   | Up |
| ENSOCUG000000024222 | 3.263747214 | 1.706529321 | -        | Up |
| ENSOCUG000000035998 | 28.89365864 | 4.852680991 | -        | Up |
| ENSOCUG000000023508 | 2.505329961 | 1.325000624 | -        | Up |
| ENSOCUG000000016145 | 3.935305255 | 1.976475547 | IL17B    | Up |
| ENSOCUG000000008253 | 3.731580694 | 1.899786884 | TFPI     | Up |
| ENSOCUG000000013815 | 2.656537205 | 1.409546918 | SEMA6A   | Up |
| ENSOCUG000000022539 | 12.65305352 | 3.661413683 | -        | Up |
| ENSOCUG000000003485 | 3.177024069 | 1.66767602  | -        | Up |
| ENSOCUG000000010895 | 2.452310648 | 1.294141745 | SVIL     | Up |
| ENSOCUG000000005824 | 2.443257812 | 1.288806105 | GLB1     | Up |
| ENSOCUG000000001578 | 2.437927658 | 1.285655317 | CUL7     | Up |
| ENSOCUG000000002999 | 15.65691831 | 3.968728375 | -        | Up |
| ENSOCUG000000021938 | 3.706823942 | 1.890183595 | -        | Up |
| ENSOCUG000000003454 | 17.25010227 | 4.10853301  | PRDM6    | Up |
| ENSOCUG000000005284 | 2.384496817 | 1.253684857 | IGSF3    | Up |
| ENSOCUG000000003561 | 2.769072216 | 1.469402679 | ZNF2     | Up |
| ENSOCUG000000004970 | 2.493769361 | 1.318328042 | ITPKB    | Up |
| ENSOCUG000000012325 | 2.43040928  | 1.281199283 | CDK5RAP3 | Up |
| ENSOCUG000000017663 | 2.87731696  | 1.524724154 | CLIP2    | Up |
| ENSOCUG000000005534 | 2.712782233 | 1.439773241 | -        | Up |
| ENSOCUG000000029021 | 2.94937306  | 1.560408317 | -        | Up |
| ENSOCUG000000021444 | 3.714290216 | 1.893086545 | -        | Up |
| ENSOCUG000000008913 | 3.022392637 | 1.595691092 | RPS6KA5  | Up |
| ENSOCUG000000002809 | 2.606888057 | 1.382328633 | PTPRG    | Up |
| ENSOCUG000000014023 | 2.483943668 | 1.312632456 | CDCA7L   | Up |
| ENSOCUG000000000933 | 2.615858269 | 1.387284376 | TMEM42   | Up |
| ENSOCUG000000013992 | 2.445637104 | 1.290210345 | TSPAN15  | Up |
| ENSOCUG000000038441 | 3.037834825 | 1.603043429 | -        | Up |
| ENSOCUG000000001810 | 2.428953951 | 1.280335139 | TPST2    | Up |
| ENSOCUG000000017494 | 4.078549371 | 2.028056116 | -        | Up |
| ENSOCUG000000017822 | 3.476062215 | 1.797453904 | -        | Up |
| ENSOCUG000000013916 | 9.79909644  | 3.292648727 | PRKCB    | Up |
| ENSOCUG000000008832 | 4.235547099 | 2.082548332 | CCDC113  | Up |
| ENSOCUG000000023520 | 5.031192423 | 2.330900368 | FLRT1    | Up |
| ENSOCUG000000006969 | 6.566046695 | 2.71502501  | DCN      | Up |
| ENSOCUG000000023350 | 3.109731088 | 1.63678983  | -        | Up |

|                    |             |             |          |    |
|--------------------|-------------|-------------|----------|----|
| ENSOCUG00000012115 | 2.464707026 | 1.301416167 | AXIN2    | Up |
| ENSOCUG00000015415 | 4.028489113 | 2.010238857 | TDRP     | Up |
| ENSOCUG00000026898 | 3.777847635 | 1.917564517 | AKR1C26  | Up |
| ENSOCUG00000002790 | 2.405143435 | 1.266122935 | PYGB     | Up |
| ENSOCUG00000027244 | 3.46922828  | 1.794614775 | -        | Up |
| ENSOCUG00000037754 | 2.664373002 | 1.413796069 | HSD3B7   | Up |
| ENSOCUG00000023579 | 3.10954492  | 1.636703458 | -        | Up |
| ENSOCUG00000009838 | 3.421357799 | 1.774568986 | FIGN     | Up |
| ENSOCUG00000011370 | 3.263432244 | 1.706390086 | -        | Up |
| ENSOCUG00000030939 | 2.629539937 | 1.394810408 | -        | Up |
| ENSOCUG00000008301 | 2.477994043 | 1.309172719 | B4GALT4  | Up |
| ENSOCUG00000003276 | 27.42216289 | 4.777270461 | PAX1     | Up |
| ENSOCUG00000039132 | 7.146272709 | 2.83719097  | -        | Up |
| ENSOCUG00000002701 | 8.922033311 | 3.157372534 | CHADL    | Up |
| ENSOCUG00000008909 | 8.549573309 | 3.09585242  | -        | Up |
| ENSOCUG00000005876 | 2.663616858 | 1.413386576 | -        | Up |
| ENSOCUG00000027932 | 2.432603279 | 1.282501058 | STX10    | Up |
| ENSOCUG00000011925 | 2.483378638 | 1.312304244 | OSBPL10  | Up |
| ENSOCUG00000012132 | 2.371502599 | 1.245801449 | CHST2    | Up |
| ENSOCUG00000015949 | 14.99603164 | 3.90650887  | CRB1     | Up |
| ENSOCUG00000004592 | 2.418031112 | 1.273832807 | XYLT2    | Up |
| ENSOCUG00000000659 | 4.05275694  | 2.018903654 | NGF      | Up |
| ENSOCUG00000004863 | 4.489137749 | 2.166438366 | IQSEC3   | Up |
| ENSOCUG00000000978 | 3.821633783 | 1.934189535 | LOXL1    | Up |
| ENSOCUG00000002522 | 4.253706336 | 2.088720437 | PTGFR    | Up |
| ENSOCUG00000023871 | 4.651657735 | 2.217744948 | -        | Up |
| ENSOCUG00000023973 | 3.831119636 | 1.937766078 | -        | Up |
| ENSOCUG00000028133 | 4.21675584  | 2.076133488 | -        | Up |
| ENSOCUG00000033345 | 3.65556002  | 1.870092439 | -        | Up |
| ENSOCUG00000030728 | 8.639483414 | 3.110945051 | -        | Up |
| ENSOCUG00000007013 | 2.702354678 | 1.434217038 | SLC16A13 | Up |
| ENSOCUG00000000487 | 2.641232519 | 1.401211314 | OGFOD2   | Up |
| ENSOCUG00000001407 | 6.917027696 | 2.790152233 | MAGI2    | Up |
| ENSOCUG00000033876 | 2.871225176 | 1.521666478 | -        | Up |
| ENSOCUG00000001047 | 4.069117492 | 2.024715938 | SMARCA1  | Up |
| ENSOCUG00000010937 | 2.525568177 | 1.336607987 | SOCS2    | Up |
| ENSOCUG00000009149 | 2.451575649 | 1.29370928  | ECHDC3   | Up |
| ENSOCUG00000022486 | 2.393197196 | 1.258939278 | -        | Up |
| ENSOCUG00000012140 | Inf         | Inf         | -        | Up |
| ENSOCUG00000000091 | 4.227555062 | 2.079823545 | SERPINF2 | Up |
| ENSOCUG00000006950 | 2.981606425 | 1.576089833 | CECR2    | Up |
| ENSOCUG00000015625 | 2.398389044 | 1.262065698 | CUX1     | Up |
| ENSOCUG00000016477 | 4.108415871 | 2.038582225 | SELP     | Up |
| ENSOCUG00000039248 | 3.283736718 | 1.71533846  | ARMCX4   | Up |

|                     |             |             |         |    |
|---------------------|-------------|-------------|---------|----|
| ENSOCUG00000013088  | 2.387052383 | 1.255230226 | -       | Up |
| ENSOCUG00000007433  | 3.035544344 | 1.601955249 | CHRNA1  | Up |
| ENSOCUG000000023802 | 3.063724777 | 1.615286702 | -       | Up |
| ENSOCUG000000005211 | 4.968700012 | 2.312868441 | PDGFRL  | Up |
| ENSOCUG000000025713 | 2.460958061 | 1.299220072 | ASGR1   | Up |
| ENSOCUG000000023299 | 4.012132665 | 2.004369311 | -       | Up |
| ENSOCUG000000028148 | 2.432488747 | 1.282433131 | PACS2   | Up |
| ENSOCUG000000016560 | 3.318801493 | 1.73066234  | ACKR4   | Up |
| ENSOCUG000000010097 | 3.419853196 | 1.773934396 | -       | Up |
| ENSOCUG000000037528 | 5.300174844 | 2.406039952 | -       | Up |
| ENSOCUG000000024110 | 2.408754978 | 1.268287648 | PALD1   | Up |
| ENSOCUG000000006691 | 2.421641781 | 1.275985472 | GSDME   | Up |
| ENSOCUG000000031273 | 3.473386705 | 1.79634304  | GPSM3   | Up |
| ENSOCUG000000003641 | 3.538672362 | 1.823208192 | LHX8    | Up |
| ENSOCUG000000006655 | 2.60556186  | 1.381594507 | HHAT    | Up |
| ENSOCUG000000003108 | 2.993213594 | 1.581695232 | TMEM44  | Up |
| ENSOCUG000000008226 | 7.789808892 | 2.961587935 | FBN2    | Up |
| ENSOCUG000000001618 | 5.263008316 | 2.395887675 | HGF     | Up |
| ENSOCUG000000003387 | 2.844366427 | 1.508107333 | KATNAL1 | Up |
| ENSOCUG000000011018 | 2.667207826 | 1.415330242 | -       | Up |
| ENSOCUG000000017338 | 4.468570935 | 2.159813526 | EDIL3   | Up |
| ENSOCUG000000035778 | 3.439348243 | 1.7821352   | -       | Up |
| ENSOCUG000000003473 | 2.979938127 | 1.575282376 | VIPR2   | Up |
| ENSOCUG000000009332 | 6.625900944 | 2.728116636 | MCOLN3  | Up |
| ENSOCUG000000031663 | 4.216548257 | 2.076062466 | -       | Up |
| ENSOCUG000000024509 | Inf         | Inf         | -       | Up |
| ENSOCUG000000023789 | 2.41617008  | 1.272722013 | -       | Up |
| ENSOCUG000000024395 | 3.977952267 | 1.992025965 | -       | Up |
| ENSOCUG000000014861 | 2.394510335 | 1.259730662 | MAPRE3  | Up |
| ENSOCUG000000025335 | 4.937794485 | 2.303866792 | SYNPO2L | Up |
| ENSOCUG000000022625 | 4.073508999 | 2.026272095 | BANF2   | Up |
| ENSOCUG000000024871 | 2.575125487 | 1.364642737 | -       | Up |
| ENSOCUG000000021270 | 2.356527432 | 1.236662476 | PARP3   | Up |
| ENSOCUG000000003059 | 2.466065734 | 1.302211256 | CTBS    | Up |
| ENSOCUG000000004150 | 2.35043135  | 1.232925544 | FGFR1   | Up |
| ENSOCUG000000015436 | 2.856265425 | 1.514130051 | ADAM22  | Up |
| ENSOCUG000000006957 | 2.7067961   | 1.436586215 | IL1R1   | Up |
| ENSOCUG000000005579 | 2.721590378 | 1.444449946 | -       | Up |
| ENSOCUG000000002897 | 2.38599676  | 1.254592084 | CUL9    | Up |
| ENSOCUG000000000754 | 2.560419304 | 1.356380091 | CYP39A1 | Up |
| ENSOCUG000000014241 | 3.08591694  | 1.625699231 | RWDD3   | Up |
| ENSOCUG000000007960 | 2.950475848 | 1.560947649 | PLOD1   | Up |
| ENSOCUG000000000608 | 2.316004789 | 1.211638236 | PTGFRN  | Up |
| ENSOCUG000000014231 | 3.529232991 | 1.819354676 | TPBGL   | Up |

|                     |             |             |          |    |
|---------------------|-------------|-------------|----------|----|
| ENSOCUG00000012380  | 2.465467939 | 1.301861492 | NPEPL1   | Up |
| ENSOCUG00000015732  | 2.420534126 | 1.275325434 | GASK1B   | Up |
| ENSOCUG00000025543  | 4.6785464   | 2.226060362 | -        | Up |
| ENSOCUG00000002791  | 2.82487943  | 1.498189292 | -        | Up |
| ENSOCUG00000025317  | 20.55709615 | 4.361564582 | PTP4A3   | Up |
| ENSOCUG00000007048  | 2.404502898 | 1.265738665 | KSR1     | Up |
| ENSOCUG00000008704  | 2.525931522 | 1.336815528 | SPATA6   | Up |
| ENSOCUG00000012038  | 2.429114152 | 1.280430288 | SLCO3A1  | Up |
| ENSOCUG00000001613  | 2.459240574 | 1.298212873 | AMER1    | Up |
| ENSOCUG00000002530  | 4.084065557 | 2.030006024 | PTGS1    | Up |
| ENSOCUG00000014709  | 8.451524066 | 3.079211527 | SLC7A4   | Up |
| ENSOCUG00000000049  | 5.815584993 | 2.539924321 | MASP1    | Up |
| ENSOCUG00000027880  | 2.919771396 | 1.545855417 | ZEB2     | Up |
| ENSOCUG00000013643  | 2.276252678 | 1.186660714 | PDLIM1   | Up |
| ENSOCUG00000000318  | 2.39100544  | 1.257617412 | -        | Up |
| ENSOCUG00000012339  | 15.85114255 | 3.986514928 | PEG3     | Up |
| ENSOCUG00000012400  | 2.587331507 | 1.371464914 | PTH1R    | Up |
| ENSOCUG000000026191 | 4.478700634 | 2.163080236 | -        | Up |
| ENSOCUG00000016314  | 3.516169104 | 1.814004456 | TMEM119  | Up |
| ENSOCUG00000001923  | 3.920845646 | 1.971164848 | CXCR4    | Up |
| ENSOCUG00000039606  | 9.120440485 | 3.189103503 | -        | Up |
| ENSOCUG00000015875  | 2.737855092 | 1.45304609  | RFTN1    | Up |
| ENSOCUG00000006999  | 3.94291197  | 1.979261501 | C2       | Up |
| ENSOCUG00000029051  | 2.524140648 | 1.335792301 | -        | Up |
| ENSOCUG00000013134  | 2.932116486 | 1.55194242  | ST8SIA1  | Up |
| ENSOCUG00000031603  | 2.433198693 | 1.282854134 | -        | Up |
| ENSOCUG00000022244  | 2.651618345 | 1.406873139 | TRPT1    | Up |
| ENSOCUG00000011196  | 3.07814481  | 1.622061104 | LAG3     | Up |
| ENSOCUG00000005689  | 2.462560316 | 1.300159061 | -        | Up |
| ENSOCUG00000009457  | 2.486332892 | 1.31401947  | SCRN2    | Up |
| ENSOCUG00000003038  | 2.573175325 | 1.36354976  | CRYZ     | Up |
| ENSOCUG00000016172  | 2.347697548 | 1.231246559 | STXBP1   | Up |
| ENSOCUG00000029190  | Inf         | Inf         | PLAC8    | Up |
| ENSOCUG00000007997  | 2.483393972 | 1.312313152 | -        | Up |
| ENSOCUG00000030250  | 2.384340209 | 1.253590101 | -        | Up |
| ENSOCUG00000009580  | 3.322908321 | 1.73244649  | WNT10B   | Up |
| ENSOCUG0000001822   | 6.376950568 | 2.672866698 | KIF17    | Up |
| ENSOCUG00000027943  | 4.3408056   | 2.117962814 | C19orf38 | Up |
| ENSOCUG00000012592  | 3.04494435  | 1.606415861 | ASB5     | Up |
| ENSOCUG00000011960  | 3.151318779 | 1.655955701 | ECE1     | Up |
| ENSOCUG00000014271  | 2.317693475 | 1.212689776 | HADH     | Up |
| ENSOCUG00000003448  | 2.407535139 | 1.267556855 | DENND6B  | Up |
| ENSOCUG00000006212  | 2.391494952 | 1.257912746 | POLR3GL  | Up |
| ENSOCUG00000005032  | 4.487845687 | 2.16602307  | -        | Up |



|                    |             |             |          |    |
|--------------------|-------------|-------------|----------|----|
| ENSOCUG00000008330 | 2.526369841 | 1.337065854 | -        | Up |
| ENSOCUG00000004686 | 2.469748545 | 1.304364163 | TENM4    | Up |
| ENSOCUG00000015054 | 15.18159171 | 3.924251153 | UNC5C    | Up |
| ENSOCUG00000001830 | 7.470828902 | 2.901268322 | DOK6     | Up |
| ENSOCUG00000016783 | 3.346824773 | 1.742793019 | DTWD1    | Up |
| ENSOCUG00000023063 | Inf         | Inf         | -        | Up |
| ENSOCUG00000010039 | 2.299438231 | 1.201281444 | FHOD1    | Up |
| ENSOCUG00000027803 | 7.139051279 | 2.835732365 | SH3GL3   | Up |
| ENSOCUG00000026694 | 2.888999854 | 1.530570131 | -        | Up |
| ENSOCUG00000009011 | 2.472535033 | 1.305990962 | -        | Up |
| ENSOCUG00000017019 | 3.425836003 | 1.77645609  | CDH11    | Up |
| ENSOCUG00000009563 | 2.377653723 | 1.249538619 | TMEM263  | Up |
| ENSOCUG00000016056 | 2.311417828 | 1.208778075 | SGSM2    | Up |
| ENSOCUG00000011229 | 2.280873756 | 1.189586597 | RNF114   | Up |
| ENSOCUG00000016271 | 2.319091693 | 1.213559863 | NT5DC3   | Up |
| ENSOCUG00000005937 | 2.615736068 | 1.387216978 | SCD5     | Up |
| ENSOCUG00000005922 | 2.368196681 | 1.243788903 | ASRGL1   | Up |
| ENSOCUG00000002368 | 2.302803421 | 1.203391261 | GGCX     | Up |
| ENSOCUG00000022309 | 2.334979265 | 1.223409739 | -        | Up |
| ENSOCUG00000017068 | 2.25303784  | 1.171871544 | ZNF608   | Up |
| ENSOCUG00000009404 | 5.817680062 | 2.540443959 | KIF19    | Up |
| ENSOCUG00000007786 | 2.799750896 | 1.485298471 | -        | Up |
| ENSOCUG00000005997 | 8.771254263 | 3.132783158 | MEIOB    | Up |
| ENSOCUG00000011468 | 14.17137853 | 3.824908199 | RDH8     | Up |
| ENSOCUG00000003384 | 6.916485052 | 2.790039048 | PRKAG3   | Up |
| ENSOCUG00000010349 | 2.309767926 | 1.207747904 | HIBADH   | Up |
| ENSOCUG00000014924 | 25.57583274 | 4.676709309 | TMEM130  | Up |
| ENSOCUG00000006248 | 2.947142677 | 1.559316906 | -        | Up |
| ENSOCUG00000002496 | 3.097704573 | 1.631199562 | -        | Up |
| ENSOCUG00000003498 | 2.605727915 | 1.381686448 | SPEF1    | Up |
| ENSOCUG00000021251 | 3.331837851 | 1.736318191 | USP49    | Up |
| ENSOCUG00000009914 | 2.552180585 | 1.351730414 | ARHGEF40 | Up |
| ENSOCUG00000000237 | 2.486612009 | 1.314181419 | TRIM45   | Up |
| ENSOCUG00000010326 | 2.289368839 | 1.194949913 | RTL10    | Up |
| ENSOCUG00000021272 | 2.436872503 | 1.285030771 | TANGO2   | Up |
| ENSOCUG00000001851 | 2.274686352 | 1.185667631 | NCKAP5L  | Up |
| ENSOCUG00000009570 | 3.204806346 | 1.680237183 | TTC28    | Up |
| ENSOCUG00000014513 | 2.589911898 | 1.372903022 | IL27RA   | Up |
| ENSOCUG00000005204 | 2.267245551 | 1.180940649 | RGS4     | Up |
| ENSOCUG00000001661 | 2.219461294 | 1.150209549 | PDIA4    | Up |
| ENSOCUG00000023116 | 2.325260688 | 1.217392468 | AGO1     | Up |
| ENSOCUG00000007943 | 2.274268761 | 1.185402754 | -        | Up |
| ENSOCUG00000016944 | 5.423842914 | 2.439315396 | BVES     | Up |
| ENSOCUG00000002336 | 2.305944203 | 1.205357605 | BST1     | Up |

|                      |             |             |           |    |
|----------------------|-------------|-------------|-----------|----|
| ENSOCUG00000004773   | 5.593137237 | 2.48365773  | MACROH2A2 | Up |
| ENSOCUG00000004959   | 9.432561336 | 3.237649576 | HHIP      | Up |
| ENSOCUG000000027484  | 4.166602323 | 2.05887141  | PPP1R3E   | Up |
| ENSOCUG000000023055  | 2.402572616 | 1.264580036 | TXNDC5    | Up |
| ENSOCUG000000035995  | 2.512940887 | 1.329376735 | -         | Up |
| ENSOCUG000000007547  | 3.766313184 | 1.913152971 | GPR135    | Up |
| ENSOCUG000000024457  | 3.120246238 | 1.641659886 | CLIP3     | Up |
| ENSOCUG000000002157  | 2.260299842 | 1.176514167 | NEO1      | Up |
| ENSOCUG000000004914  | 3.17632567  | 1.66735884  | RAB36     | Up |
| ENSOCUG000000012007  | 4.246932712 | 2.086421251 | PRR5L     | Up |
| ENSOCUG000000003341  | 2.393147191 | 1.258909133 | -         | Up |
| ENSOCUG000000017607  | 2.496536299 | 1.319927883 | NMT2      | Up |
| ENSOCUG000000000255  | 3.124852317 | 1.643788008 | ARHGEF6   | Up |
| ENSOCUG000000016703  | 2.31433324  | 1.210596612 | TRERF1    | Up |
| ENSOCUG000000011841  | 2.257046412 | 1.174436085 | LIG1      | Up |
| ENSOCUG000000021711  | 25.83915084 | 4.691486754 | PPP1R1B   | Up |
| ENSOCUG000000017922  | 2.297957308 | 1.200351995 | ABCD1     | Up |
| ENSOCUG000000005668  | 2.307637605 | 1.206416679 | TRAF1     | Up |
| ENSOCUG000000006025  | 8.443317131 | 3.077809903 | -         | Up |
| ENSOCUG000000010835  | 2.437569555 | 1.285443386 | NOL4L     | Up |
| ENSOCUG000000017585  | 3.816875215 | 1.932392021 | OTULINL   | Up |
| ENSOCUG000000016548  | 3.169372278 | 1.66419713  | ROR2      | Up |
| ENSOCUG000000005788  | 3.033883902 | 1.601165879 | SLC22A7   | Up |
| ENSOCUG000000012304  | 13.05763556 | 3.706821776 | -         | Up |
| ENSOCUG000000021079  | 2.259384031 | 1.175929509 | -         | Up |
| ENSOCUG000000016179  | 4.695813863 | 2.231375223 | THEMIS2   | Up |
| ENSOCUG000000011801  | 6.862216446 | 2.778674632 | RNF165    | Up |
| ENSOCUG000000023464  | 2.367186254 | 1.243173224 | SOX13     | Up |
| ENSOCUG000000023203  | 9.803801416 | 3.293341261 | ADGRA1    | Up |
| ENSOCUG000000011690  | 2.320323666 | 1.214326064 | SLC25A28  | Up |
| ENSOCUG000000003525  | 2.365830938 | 1.242346982 | -         | Up |
| ENSOCUG000000016426  | 3.248516142 | 1.699780874 | AGER      | Up |
| ENSOCUG000000001046  | 4.059548206 | 2.021319176 | IBSP      | Up |
| ENSOCUG000000003984  | 6.075570797 | 2.603019956 | SLC8A3    | Up |
| ENSOCUG000000007830  | 2.745520594 | 1.457079733 | IL31RA    | Up |
| ENSOCUG000000012701  | 9.421935092 | 3.236023393 | TLR8      | Up |
| ENSOCUG000000011775  | 3.895602548 | 1.961846493 | RIMS2     | Up |
| ENSOCUG0000000035695 | Inf         | Inf         | -         | Up |
| ENSOCUG000000009072  | 2.748529175 | 1.458659793 | -         | Up |
| ENSOCUG000000005519  | 3.142808909 | 1.652054555 | ARMC12    | Up |
| ENSOCUG000000013958  | 2.296175304 | 1.19923279  | MMAB      | Up |
| ENSOCUG000000013360  | 2.432308276 | 1.28232609  | ZNF346    | Up |
| ENSOCUG000000015065  | 2.579553014 | 1.367121096 | NFKBIL1   | Up |
| ENSOCUG000000012747  | 2.285840611 | 1.192724809 | PRKAR2B   | Up |

|                    |             |             |         |    |
|--------------------|-------------|-------------|---------|----|
| ENSOCUG00000012904 | 2.30896441  | 1.207245936 | LAYN    | Up |
| ENSOCUG00000015267 | 2.281224199 | 1.189808242 | GPX8    | Up |
| ENSOCUG00000017370 | 2.229845947 | 1.156944042 | FRMD4A  | Up |
| ENSOCUG00000005790 | 4.998350646 | 2.321452113 | FAM81A  | Up |
| ENSOCUG00000002587 | 3.461322812 | 1.791323497 | TSHZ2   | Up |
| ENSOCUG00000003860 | 2.290692675 | 1.195783916 | PEX6    | Up |
| ENSOCUG00000013461 | 2.278343125 | 1.187985037 | CRYL1   | Up |
| ENSOCUG00000000094 | 3.503272451 | 1.808703191 | -       | Up |
| ENSOCUG00000026351 | 2.696973965 | 1.431341595 | -       | Up |
| ENSOCUG00000026503 | 2.666762549 | 1.415089372 | -       | Up |
| ENSOCUG00000014795 | 2.342224482 | 1.227879353 | IGF1R   | Up |
| ENSOCUG00000023997 | 2.511580889 | 1.32859574  | -       | Up |
| ENSOCUG00000005584 | 2.38320176  | 1.252901094 | -       | Up |
| ENSOCUG00000001591 | 2.260548968 | 1.17667317  | ZNF516  | Up |
| ENSOCUG00000004630 | 2.270505236 | 1.183013364 | AKNA    | Up |
| ENSOCUG00000013137 | 2.768440094 | 1.469073304 | CETP    | Up |
| ENSOCUG00000003182 | 2.307990786 | 1.206637465 | TMEM140 | Up |
| ENSOCUG00000002090 | 4.562595298 | 2.189854692 | RASSF2  | Up |
| ENSOCUG00000010551 | 3.504858399 | 1.809356159 | SLC7A3  | Up |
| ENSOCUG00000005602 | 2.942016207 | 1.556805194 | P3H1    | Up |
| ENSOCUG00000014771 | 2.53230054  | 1.340448638 | TBKBP1  | Up |
| ENSOCUG00000012912 | 2.37527292  | 1.248093289 | -       | Up |
| ENSOCUG00000011681 | 2.19383254  | 1.133453406 | GNAI2   | Up |
| ENSOCUG00000010238 | 2.695527742 | 1.430567758 | PIEZO2  | Up |
| ENSOCUG00000006439 | 2.231920023 | 1.158285331 | ZHX3    | Up |
| ENSOCUG00000012160 | 2.195686048 | 1.134671784 | PRRC1   | Up |
| ENSOCUG00000026676 | 2.759712349 | 1.464517899 | -       | Up |
| ENSOCUG00000010827 | 2.265023529 | 1.179526037 | BOC     | Up |
| ENSOCUG00000016942 | 3.163843153 | 1.66167808  | ALDH1A2 | Up |
| ENSOCUG00000022152 | 2.223883425 | 1.153081164 | RFC2    | Up |
| ENSOCUG00000005275 | 2.333424987 | 1.222449089 | NPRL2   | Up |
| ENSOCUG00000004145 | 2.300382454 | 1.201873739 | ATP7B   | Up |
| ENSOCUG00000017751 | 3.513271248 | 1.812814966 | -       | Up |
| ENSOCUG00000012388 | 7.928390131 | 2.987027955 | EMILIN3 | Up |
| ENSOCUG00000007313 | 2.222543092 | 1.152211391 | CREB3L2 | Up |
| ENSOCUG00000003251 | 10.6976314  | 3.419219495 | ZNF426  | Up |
| ENSOCUG00000001555 | 3.480939645 | 1.7994768   | ACE     | Up |
| ENSOCUG00000000025 | 2.296406402 | 1.199377983 | SLCO2A1 | Up |
| ENSOCUG00000029231 | 2.203092482 | 1.139530058 | -       | Up |
| ENSOCUG00000034046 | 2.315873395 | 1.211556386 | -       | Up |
| ENSOCUG00000004298 | Inf         | Inf         | NT5C1A  | Up |
| ENSOCUG00000022623 | 2.234667009 | 1.160059869 | CISD3   | Up |
| ENSOCUG00000008544 | 2.163802982 | 1.113569145 | ADAR    | Up |
| ENSOCUG00000011487 | 5.111239401 | 2.353673166 | DKK1    | Up |

|                     |             |             |                 |    |
|---------------------|-------------|-------------|-----------------|----|
| ENSOCUG00000008956  | 3.445246598 | 1.784607249 | PCTP            | Up |
| ENSOCUG00000013782  | 2.23106302  | 1.157731266 | PHKA2           | Up |
| ENSOCUG00000017830  | 2.214631894 | 1.147066921 | NPRL3           | Up |
| ENSOCUG00000000919  | 2.196157431 | 1.134981477 | -               | Up |
| ENSOCUG00000009507  | Inf         | Inf         | ADAMTS16        | Up |
| ENSOCUG00000007437  | 2.228846377 | 1.156297182 | ZBTB4           | Up |
| ENSOCUG00000013230  | 2.296789    | 1.199618326 | MTCL1           | Up |
| ENSOCUG00000001335  | 3.935348917 | 1.976491554 | -               | Up |
| ENSOCUG00000007245  | 2.211817573 | 1.145232399 | SIRT5           | Up |
| ENSOCUG00000002541  | 2.198935106 | 1.136805028 | BNIP3           | Up |
| ENSOCUG00000010384  | 7.521975052 | 2.911111521 | IL16            | Up |
| ENSOCUG00000030576  | 24.21105917 | 4.597594289 | -               | Up |
| ENSOCUG000000011739 | 2.408615188 | 1.26820392  | RUNX2           | Up |
| ENSOCUG00000006943  | 2.148044734 | 1.103024039 | UNC5B           | Up |
| ENSOCUG00000004664  | 3.963362677 | 1.986724991 | MIAP            | Up |
| ENSOCUG00000007964  | 2.498672367 | 1.321161743 | TBC1D4          | Up |
| ENSOCUG00000009809  | 4.948359728 | 2.306950383 | -               | Up |
| ENSOCUG00000006404  | 5.195822908 | 2.377352259 | SLC6A7          | Up |
| ENSOCUG00000034585  | 5.378072348 | 2.427089163 | MTRNR2L10       | Up |
| ENSOCUG00000023626  | 4.270618115 | 2.094444896 | -               | Up |
| ENSOCUG00000035337  | 2.887358476 | 1.529750235 | -               | Up |
| ENSOCUG00000024841  | 14.1922296  | 3.827029349 | LRRC74B         | Up |
| ENSOCUG00000006958  | 3.656210982 | 1.870349323 | STING1          | Up |
| ENSOCUG00000017890  | 3.567997545 | 1.835114623 | MDGA1           | Up |
| ENSOCUG00000012514  | 3.01093352  | 1.590210854 | XRRA1           | Up |
| ENSOCUG00000001515  | Inf         | Inf         | CCL19           | Up |
| ENSOCUG00000002876  | 2.762136056 | 1.465784385 | TBCEL-TECT<br>A | Up |
| ENSOCUG00000007719  | 3.820752496 | 1.933856804 | PDE3B           | Up |
| ENSOCUG00000014994  | 2.235255393 | 1.160439679 | UNK             | Up |
| ENSOCUG00000010911  | 2.696768715 | 1.431231796 | PELI3           | Up |
| ENSOCUG00000025997  | 2.516900474 | 1.331648169 | -               | Up |
| ENSOCUG00000014833  | 5.773913353 | 2.529549458 | PLA2R1          | Up |
| ENSOCUG00000009767  | 2.186079091 | 1.128345598 | DTNBP1          | Up |
| ENSOCUG00000002218  | 2.310815324 | 1.208401967 | -               | Up |
| ENSOCUG00000014660  | 8.643036503 | 3.111538254 | CNKS2R2         | Up |
| ENSOCUG00000014689  | 96.80303866 | 6.596980429 | IGF1            | Up |
| ENSOCUG00000012565  | 2.293950113 | 1.197834017 | FUT11           | Up |
| ENSOCUG00000010032  | 2.285761119 | 1.192674638 | THBS3           | Up |
| ENSOCUG00000007741  | 2.168094297 | 1.116427505 | CRTAP           | Up |
| ENSOCUG00000010260  | 2.229990129 | 1.157037324 | RASSF4          | Up |
| ENSOCUG00000026607  | 2.775682875 | 1.472842748 | -               | Up |
| ENSOCUG00000035406  | 2.800163808 | 1.485511226 | PRAF2           | Up |
| ENSOCUG00000005097  | 2.189285618 | 1.130460184 | BRD3            | Up |

|                     |             |             |           |    |
|---------------------|-------------|-------------|-----------|----|
| ENSOCUG00000003921  | 2.496306348 | 1.319794993 | GLIPR1    | Up |
| ENSOCUG00000010271  | 20.48560162 | 4.356538357 | STX1B     | Up |
| ENSOCUG000000029426 | 2.160314492 | 1.111241351 | -         | Up |
| ENSOCUG000000023342 | 2.174586295 | 1.120740961 | RTN2      | Up |
| ENSOCUG00000015314  | Inf         | Inf         | -         | Up |
| ENSOCUG00000002183  | 2.176448499 | 1.121975882 | PML       | Up |
| ENSOCUG00000023355  | 9.060310899 | 3.179560556 | MYO7A     | Up |
| ENSOCUG00000005036  | 2.390336057 | 1.25721346  | -         | Up |
| ENSOCUG00000011473  | 3.591081899 | 1.844418556 | PRKG1     | Up |
| ENSOCUG00000012919  | 3.089537534 | 1.627390901 | DIXDC1    | Up |
| ENSOCUG00000005128  | 3.30477187  | 1.724550685 | PPP1R9A   | Up |
| ENSOCUG00000039678  | 3.607785356 | 1.851113508 | -         | Up |
| ENSOCUG00000008132  | 2.153069911 | 1.106395165 | -         | Up |
| ENSOCUG00000004990  | 2.371819793 | 1.2459944   | APEH      | Up |
| ENSOCUG00000001235  | 3.349203259 | 1.743817934 | ADAM19    | Up |
| ENSOCUG00000007017  | 3.250362327 | 1.700600548 | SLC16A11  | Up |
| ENSOCUG00000007880  | 2.21711616  | 1.148684358 | NIPSNAP3A | Up |
| ENSOCUG00000005158  | 2.530169118 | 1.339233819 | -         | Up |
| ENSOCUG00000025595  | 2.433994356 | 1.283325823 | RHBDD3    | Up |
| ENSOCUG00000010540  | 3.978882148 | 1.992363168 | -         | Up |
| ENSOCUG00000003157  | 2.226387116 | 1.154704465 | DCBLD1    | Up |
| ENSOCUG00000001030  | 3.843430964 | 1.942394755 | GEM       | Up |
| ENSOCUG00000006386  | 2.107558896 | 1.075572948 | ATP10A    | Up |
| ENSOCUG00000034394  | 2.233309259 | 1.159183043 | -         | Up |
| ENSOCUG00000002318  | 2.158998765 | 1.110362418 | NUAK2     | Up |
| ENSOCUG00000021497  | 2.244473582 | 1.166377116 | -         | Up |
| ENSOCUG00000011359  | 2.280309255 | 1.189229496 | ACAD10    | Up |
| ENSOCUG00000029716  | 2.135566816 | 1.094619036 | ARHGEF17  | Up |
| ENSOCUG00000026956  | 23.92206916 | 4.580270277 | GDF7      | Up |
| ENSOCUG00000010201  | 2.149950079 | 1.104303161 | NEK9      | Up |
| ENSOCUG00000010558  | 2.155867999 | 1.108268846 | PCCB      | Up |
| ENSOCUG00000001750  | 2.610341796 | 1.384238725 | PRPF40B   | Up |
| ENSOCUG00000013036  | 7.047378348 | 2.817086669 | RHO       | Up |
| ENSOCUG00000015051  | 4.036790502 | 2.013208717 | PPP1R3C   | Up |
| ENSOCUG00000001524  | 2.494229452 | 1.318594189 | -         | Up |
| ENSOCUG00000025219  | 3.128956037 | 1.645681388 | OAF       | Up |
| ENSOCUG00000005892  | 2.855003465 | 1.513492497 | ARHGAP33  | Up |
| ENSOCUG00000023066  | 2.155911942 | 1.108298252 | STAT5A    | Up |
| ENSOCUG00000010026  | 2.230190132 | 1.15716671  | -         | Up |
| ENSOCUG00000010023  | 2.168724207 | 1.1168466   | ABHD14B   | Up |
| ENSOCUG00000015336  | 8.317829492 | 3.056207111 | DNAI1     | Up |
| ENSOCUG00000024508  | 2.19309872  | 1.132970755 | -         | Up |
| ENSOCUG000000027921 | 2.390863873 | 1.25753199  | -         | Up |
| ENSOCUG00000015752  | 3.350527892 | 1.744388417 | ACSS3     | Up |

|                    |             |             |          |    |
|--------------------|-------------|-------------|----------|----|
| ENSOCUG00000029321 | 2.212644394 | 1.145771607 | MPV17    | Up |
| ENSOCUG00000021633 | 2.64259236  | 1.401953895 | LIMS2    | Up |
| ENSOCUG00000014685 | 2.158477706 | 1.110014192 | FBXW8    | Up |
| ENSOCUG00000004947 | 2.424811074 | 1.277872346 | SLC45A2  | Up |
| ENSOCUG00000006639 | 3.085822224 | 1.62565495  | ENOX1    | Up |
| ENSOCUG00000027228 | 22.42157047 | 4.486815427 | SMTNL1   | Up |
| ENSOCUG00000011921 | 6.498565523 | 2.700121296 | FAM216A  | Up |
| ENSOCUG00000016799 | 2.196238147 | 1.1350345   | CYB5R1   | Up |
| ENSOCUG00000010654 | 2.303990142 | 1.204134544 | ARHGAP24 | Up |
| ENSOCUG00000027034 | Inf         | Inf         | -        | Up |
| ENSOCUG00000008062 | 2.18168224  | 1.125440989 | -        | Up |
| ENSOCUG00000016823 | 2.374936814 | 1.24788913  | COBL     | Up |
| ENSOCUG00000003017 | 2.586542703 | 1.37102501  | ERICH3   | Up |
| ENSOCUG00000021414 | 4.947840035 | 2.306798858 | RIIAD1   | Up |
| ENSOCUG00000013030 | 2.223026668 | 1.152525255 | TMEM101  | Up |
| ENSOCUG00000004080 | 2.279427683 | 1.188671639 | RASL10B  | Up |
| ENSOCUG00000007820 | 2.194229138 | 1.133714191 | ERAP1    | Up |
| ENSOCUG00000001704 | Inf         | Inf         | LRRC30   | Up |
| ENSOCUG00000015922 | 3.188033412 | 1.67266675  | RNASEL   | Up |
| ENSOCUG00000015702 | 2.351129362 | 1.23335392  | EPOR     | Up |
| ENSOCUG00000012643 | 2.139640372 | 1.097368331 | OSMR     | Up |
| ENSOCUG00000011389 | 2.625497233 | 1.392590675 | -        | Up |
| ENSOCUG00000006661 | 2.176469815 | 1.121990012 | TRIM47   | Up |
| ENSOCUG00000007709 | 2.250637863 | 1.17033394  | IFT22    | Up |
| ENSOCUG00000016068 | 4.400160682 | 2.137556208 | SERPINE1 | Up |
| ENSOCUG00000024268 | 2.162447676 | 1.112665225 | IFT140   | Up |
| ENSOCUG00000026152 | 2.547312809 | 1.348976133 | DBN1     | Up |
| ENSOCUG00000027852 | 2.185551208 | 1.127997181 | IQSEC2   | Up |
| ENSOCUG00000009804 | 2.147490297 | 1.102651613 | STX2     | Up |
| ENSOCUG00000010695 | 2.177877812 | 1.122923015 | BABAM2   | Up |
| ENSOCUG00000005220 | 2.158981917 | 1.11035116  | POMGNT1  | Up |
| ENSOCUG00000006186 | 4.40140259  | 2.137963339 | CPXM1    | Up |
| ENSOCUG00000013824 | 2.154306121 | 1.107223268 | KIFAP3   | Up |
| ENSOCUG00000006228 | 2.564059345 | 1.358429654 | SUSD4    | Up |
| ENSOCUG00000007453 | 3.590514381 | 1.844190541 | SMAD9    | Up |
| ENSOCUG00000002153 | 2.22219855  | 1.151987725 | ATAT1    | Up |
| ENSOCUG00000013453 | 3.360680576 | 1.748753425 | HMCN1    | Up |
| ENSOCUG00000038690 | 3.456919191 | 1.789486879 | IRGC     | Up |
| ENSOCUG00000010299 | 2.096032984 | 1.06766142  | CSRP1    | Up |
| ENSOCUG00000001655 | 40.2436399  | 5.330688893 | -        | Up |
| ENSOCUG00000010077 | Inf         | Inf         | KCTD19   | Up |
| ENSOCUG00000012663 | 2.65742565  | 1.410029328 | MSTN     | Up |
| ENSOCUG00000002413 | 4.311821551 | 2.108297472 | HOXD4    | Up |
| ENSOCUG00000005540 | 12.31109541 | 3.62188723  | CAPN6    | Up |

|                    |             |             |          |    |
|--------------------|-------------|-------------|----------|----|
| ENSOCUG00000026756 | 2.159480343 | 1.110684184 | ALDH16A1 | Up |
| ENSOCUG00000025354 | 14.82440379 | 3.889902178 | -        | Up |
| ENSOCUG00000011626 | 3.909207535 | 1.966876178 | CAMK1D   | Up |
| ENSOCUG00000004792 | 2.27297553  | 1.184582153 | TATDN3   | Up |
| ENSOCUG00000026268 | 3.569995367 | 1.835922202 | ADIPOQ   | Up |
| ENSOCUG00000009811 | 2.417970177 | 1.27379645  | ZNFX1    | Up |
| ENSOCUG00000025758 | 2.15627706  | 1.108542562 | -        | Up |
| ENSOCUG00000033016 | 2.365980004 | 1.242437881 | -        | Up |
| ENSOCUG00000012937 | 2.421995895 | 1.27619642  | PRKACB   | Up |
| ENSOCUG00000000763 | 4.20967751  | 2.073709717 | PLA2G7   | Up |
| ENSOCUG00000025312 | 2.892925412 | 1.532529127 | -        | Up |
| ENSOCUG00000014466 | 2.165470717 | 1.114680663 | -        | Up |
| ENSOCUG00000021573 | 2.149214933 | 1.103809768 | DNASE2   | Up |
| ENSOCUG00000022248 | 9.580586929 | 3.260114041 | RUFY4    | Up |
| ENSOCUG00000037257 | 2.118453575 | 1.083011513 | PAQR7    | Up |
| ENSOCUG00000027575 | 3.7195292   | 1.895120024 | KCNH2    | Up |
| ENSOCUG00000004935 | 3.746024251 | 1.905360239 | CYP24A1  | Up |
| ENSOCUG00000014035 | 2.489823097 | 1.316043242 | SH3BGRL  | Up |
| ENSOCUG00000015613 | 2.105101932 | 1.073890092 | TPST1    | Up |
| ENSOCUG00000005189 | 2.095703232 | 1.067434434 | -        | Up |
| ENSOCUG00000011260 | 2.270142795 | 1.182783048 | DNAJC27  | Up |
| ENSOCUG00000015244 | 3.370381803 | 1.752912032 | -        | Up |
| ENSOCUG00000006656 | 3.72269201  | 1.896346262 | DAAM2    | Up |
| ENSOCUG00000014570 | 4.533132775 | 2.180508418 | FRRS1L   | Up |
| ENSOCUG00000003589 | 2.658579281 | 1.41065549  | ENO2     | Up |
| ENSOCUG00000009110 | 38.99877697 | 5.285356975 | PPP1R17  | Up |
| ENSOCUG00000035146 | 2.205133885 | 1.140866252 | -        | Up |
| ENSOCUG00000027604 | 2.135005268 | 1.09423963  | MLLT6    | Up |
| ENSOCUG00000001675 | 2.109827933 | 1.077125345 | PHF21A   | Up |
| ENSOCUG00000007140 | 2.079728629 | 1.056395292 | ABL1     | Up |
| ENSOCUG00000022021 | 4.313804403 | 2.108960763 | IL22RA2  | Up |
| ENSOCUG00000005930 | 3.989335393 | 1.996148419 | ZFPM2    | Up |
| ENSOCUG00000006952 | 3.009359398 | 1.589456413 | SPATA24  | Up |
| ENSOCUG00000027965 | 3.461338152 | 1.791329891 | CYP46A1  | Up |
| ENSOCUG00000023029 | 3.106252966 | 1.635175324 | CLEC2L   | Up |
| ENSOCUG00000013176 | 2.092209718 | 1.065027471 | SMO      | Up |
| ENSOCUG00000029390 | 2.610273011 | 1.384200707 | PTGES3L  | Up |
| ENSOCUG00000001724 | 3.257168234 | 1.703618238 | PRRX2    | Up |
| ENSOCUG00000011021 | 4.097010637 | 2.034571638 | MYBPH    | Up |
| ENSOCUG00000008561 | 3.795759549 | 1.924388605 | -        | Up |
| ENSOCUG00000011457 | 2.130395242 | 1.091121111 | FZD7     | Up |
| ENSOCUG00000017352 | 2.057309027 | 1.040758517 | -        | Up |
| ENSOCUG00000026356 | Inf         | Inf         | -        | Up |
| ENSOCUG00000013315 | 5.809442097 | 2.538399623 | -        | Up |

|                     |             |             |         |    |
|---------------------|-------------|-------------|---------|----|
| ENSOCUG00000012391  | 2.074589423 | 1.052825845 | PRPS1   | Up |
| ENSOCUG00000007223  | 2.283319682 | 1.191132862 | EIF2AK2 | Up |
| ENSOCUG000000029223 | 2.817027678 | 1.494173739 | ZNF699  | Up |
| ENSOCUG00000001863  | 2.47680038  | 1.308477598 | VATIL   | Up |
| ENSOCUG00000010919  | 9.436522285 | 3.23825527  | PABPC5  | Up |
| ENSOCUG00000003142  | 2.589451523 | 1.37264655  | AR      | Up |
| ENSOCUG00000033705  | 2.280187318 | 1.189152347 | -       | Up |
| ENSOCUG000000024985 | 2.177550635 | 1.122706267 | RNF215  | Up |
| ENSOCUG00000003425  | 2.101045825 | 1.071107628 | GLG1    | Up |
| ENSOCUG00000007731  | 2.190792856 | 1.131453081 | PDZRN3  | Up |
| ENSOCUG000000021137 | 2.785707609 | 1.478043839 | SFRP5   | Up |
| ENSOCUG00000009436  | 7.241021333 | 2.856193201 | CNGA2   | Up |
| ENSOCUG00000009400  | Inf         | Inf         | DNAI2   | Up |
| ENSOCUG00000037275  | 15.38564059 | 3.943512607 | -       | Up |
| ENSOCUG000000021275 | 2.210338092 | 1.14426706  | ENDOG   | Up |
| ENSOCUG000000024688 | 2.127027561 | 1.088838727 | DNMT3A  | Up |
| ENSOCUG00000011938  | 2.106959553 | 1.075162619 | TCTN1   | Up |
| ENSOCUG000000021918 | 2.118581574 | 1.08309868  | -       | Up |
| ENSOCUG000000022990 | 18.82572346 | 4.234633403 | -       | Up |
| ENSOCUG00000004825  | 3.177616693 | 1.667945107 | DRD1    | Up |
| ENSOCUG00000010891  | 2.157505044 | 1.109363932 | -       | Up |
| ENSOCUG00000010557  | 2.131108086 | 1.091603766 | MANBA   | Up |
| ENSOCUG00000014464  | 5.258476579 | 2.3946449   | GAS2    | Up |
| ENSOCUG000000002617 | 2.425670922 | 1.278383841 | YDJC    | Up |
| ENSOCUG000000006121 | 3.205986722 | 1.680768451 | APLF    | Up |
| ENSOCUG00000012991  | 2.02683145  | 1.01922612  | PDIA6   | Up |
| ENSOCUG00000006606  | 3.022684055 | 1.59583019  | DCHS1   | Up |
| ENSOCUG000000027538 | 7.547276729 | 2.915956173 | -       | Up |
| ENSOCUG000000029346 | 4.648625166 | 2.216804101 | CALY    | Up |
| ENSOCUG00000009029  | 2.610415204 | 1.384279295 | ENKD1   | Up |
| ENSOCUG000000038679 | 2.102316459 | 1.071979852 | -       | Up |
| ENSOCUG00000004582  | 4.546305488 | 2.184694629 | DMRT3   | Up |
| ENSOCUG00000013831  | 9.35298539  | 3.225426934 | TMOD1   | Up |
| ENSOCUG00000016547  | 4.551502124 | 2.186342754 | CCDC89  | Up |
| ENSOCUG00000003806  | 21.53930496 | 4.428899792 | KY      | Up |
| ENSOCUG000000033686 | Inf         | Inf         | -       | Up |
| ENSOCUG000000002134 | 2.24190838  | 1.164727321 | EMP3    | Up |
| ENSOCUG000000023638 | 4.926489242 | 2.300559907 | KCNIP3  | Up |
| ENSOCUG000000022137 | 2.224763856 | 1.153652211 | PEMT    | Up |
| ENSOCUG00000012674  | 2.807396166 | 1.489232664 | CACNA1B | Up |
| ENSOCUG00000013870  | 2.585515254 | 1.370451817 | MOK     | Up |
| ENSOCUG000000026203 | 2.660661093 | 1.411784756 | C1QL1   | Up |
| ENSOCUG000000001454 | 3.529323827 | 1.819391808 | NES     | Up |
| ENSOCUG000000001727 | 2.171659604 | 1.118797986 | SLC19A1 | Up |



|                    |             |             |          |    |
|--------------------|-------------|-------------|----------|----|
| ENSOCUG00000011611 | 3.935406777 | 1.976512765 | SLC2A9   | Up |
| ENSOCUG00000025234 | 2.075034166 | 1.053135091 | -        | Up |
| ENSOCUG00000032659 | 2.274792011 | 1.185734643 | -        | Up |
| ENSOCUG00000020990 | 5.951304974 | 2.57320605  | -        | Up |
| ENSOCUG00000008091 | 2.132680224 | 1.092667663 | SLC2A8   | Up |
| ENSOCUG00000000635 | 5.011428286 | 2.325221839 | EYA4     | Up |
| ENSOCUG00000021313 | 3.956684302 | 1.984291959 | C11orf96 | Up |
| ENSOCUG00000039281 | 2.363992679 | 1.241225567 | -        | Up |
| ENSOCUG00000011564 | 2.108827066 | 1.076440792 | RFX5     | Up |
| ENSOCUG00000009635 | 2.0854467   | 1.06035644  | -        | Up |
| ENSOCUG00000016283 | 2.998976361 | 1.58447015  | RPL3L    | Up |
| ENSOCUG00000012533 | 2.013172079 | 1.009470494 | -        | Up |
| ENSOCUG00000003431 | 5.377263156 | 2.426872077 | BMP6     | Up |
| ENSOCUG00000031548 | 2.486405812 | 1.314061781 | -        | Up |
| ENSOCUG00000031409 | 3.335032533 | 1.737700835 | PCOLCE   | Up |
| ENSOCUG00000004495 | 2.294499161 | 1.198179279 | PYCARD   | Up |
| ENSOCUG00000006333 | 2.127148572 | 1.088920802 | -        | Up |
| ENSOCUG00000038149 | 4.080993302 | 2.028920343 | SMIM17   | Up |
| ENSOCUG00000004124 | 2.607581119 | 1.382712134 | TMEM117  | Up |
| ENSOCUG00000023448 | 2.112349961 | 1.078848871 | GSTM2    | Up |
| ENSOCUG00000016759 | 2.125216193 | 1.087609611 | CBR3     | Up |
| ENSOCUG00000016324 | 2.39985693  | 1.262948401 | CIT      | Up |
| ENSOCUG00000003818 | 2.067821401 | 1.048111584 | TRIM44   | Up |
| ENSOCUG00000003112 | 5.15778722  | 2.366752257 | STRC     | Up |
| ENSOCUG00000014610 | 2.072687408 | 1.051502553 | ABCC4    | Up |
| ENSOCUG00000012137 | 2.100407644 | 1.070669351 | -        | Up |
| ENSOCUG00000005575 | 3.273913977 | 1.711016415 | FLOT2    | Up |
| ENSOCUG00000020977 | 2.178000808 | 1.123004489 | -        | Up |
| ENSOCUG00000021436 | Inf         | Inf         | -        | Up |
| ENSOCUG00000000171 | 4.081679096 | 2.029162761 | GREM2    | Up |
| ENSOCUG00000024365 | 2.11895106  | 1.083350267 | ARF5     | Up |
| ENSOCUG00000022823 | 2.021204111 | 1.015215019 | ID3      | Up |
| ENSOCUG00000015416 | 2.095700447 | 1.067432517 | ZNF689   | Up |
| ENSOCUG00000010677 | 5.816731756 | 2.540208774 | INSRR    | Up |
| ENSOCUG00000025258 | 2.063153161 | 1.044850926 | RPL13A   | Up |
| ENSOCUG00000027869 | 2.179705767 | 1.124133402 | -        | Up |
| ENSOCUG00000010173 | 2.528696587 | 1.338393941 | PHLDB1   | Up |
| ENSOCUG00000005870 | 2.286616763 | 1.19321459  | ST3GAL3  | Up |
| ENSOCUG00000016155 | 2.096608754 | 1.068057667 | -        | Up |
| ENSOCUG00000005369 | 2.004904725 | 1.00353368  | CERS4    | Up |
| ENSOCUG00000006893 | 7.588432396 | 2.923801887 | MARCO    | Up |
| ENSOCUG00000017432 | 21.57884462 | 4.431545717 | SELL     | Up |
| ENSOCUG00000004877 | 7.22351784  | 2.852701598 | ZNF385B  | Up |
| ENSOCUG00000006752 | 2.576615818 | 1.365477443 | MEST     | Up |

|                     |             |             |           |    |
|---------------------|-------------|-------------|-----------|----|
| ENSOCUG00000015706  | 2.065575794 | 1.046543999 | -         | Up |
| ENSOCUG00000011901  | 4.191710469 | 2.06753907  | EN1       | Up |
| ENSOCUG000000024399 | 2.380851552 | 1.25147767  | NAB2      | Up |
| ENSOCUG00000005078  | 2.053223217 | 1.037890479 | STAT5B    | Up |
| ENSOCUG000000021276 | 3.680812895 | 1.880024416 | MRAP      | Up |
| ENSOCUG000000012677 | 4.542523097 | 2.18349385  | ENTPD1    | Up |
| ENSOCUG000000023671 | 2.352538552 | 1.234218365 | FAM131A   | Up |
| ENSOCUG000000025664 | 2.087662209 | 1.061888298 | C17orf49  | Up |
| ENSOCUG000000025033 | 2.816942758 | 1.494130247 | KIAA0895L | Up |
| ENSOCUG00000008578  | 3.586806175 | 1.842699787 | DYNLRB2   | Up |
| ENSOCUG000000012528 | 2.063459609 | 1.045065198 | ST3GAL4   | Up |
| ENSOCUG000000003892 | 3.124317124 | 1.643540897 | -         | Up |
| ENSOCUG000000024717 | 2.59952552  | 1.378485295 | -         | Up |
| ENSOCUG000000010933 | 21.35149717 | 4.41626533  | POU3F3    | Up |
| ENSOCUG000000036875 | 11.49715456 | 3.523204947 | -         | Up |
| ENSOCUG000000000247 | 2.038101093 | 1.027225614 | CHPF2     | Up |
| ENSOCUG000000022952 | 2.030682902 | 1.021964976 | NUCB1     | Up |
| ENSOCUG000000007587 | Inf         | Inf         | -         | Up |
| ENSOCUG000000017943 | 2.829792096 | 1.500696063 | LCP1      | Up |
| ENSOCUG000000027712 | 2.009536486 | 1.006862772 | -         | Up |
| ENSOCUG000000021400 | 2.341064024 | 1.22716439  | -         | Up |
| ENSOCUG000000004401 | 2.584064533 | 1.3696421   | MPDZ      | Up |
| ENSOCUG000000014216 | 2.054060824 | 1.038478903 | CARMIL1   | Up |
| ENSOCUG000000023105 | 2.410516614 | 1.269342373 | RFLNB     | Up |
| ENSOCUG000000004900 | 2.019279913 | 1.013840912 | PALLD     | Up |
| ENSOCUG000000011284 | 2.910658091 | 1.541345379 | SLC7A2    | Up |
| ENSOCUG000000021629 | 2.248624525 | 1.16904278  | RASIP1    | Up |
| ENSOCUG000000004554 | 4.077332941 | 2.027625767 | -         | Up |
| ENSOCUG000000008134 | 2.679656514 | 1.422048084 | CHN1      | Up |
| ENSOCUG000000002504 | 2.214152202 | 1.146754397 | WWOX      | Up |
| ENSOCUG000000023161 | 2.577252289 | 1.36583377  | RYR1      | Up |
| ENSOCUG000000023490 | 2.034414167 | 1.024613414 | PRICKLE1  | Up |
| ENSOCUG000000024100 | 7.723062338 | 2.949173016 | PPMIN     | Up |
| ENSOCUG000000004764 | 2.692088479 | 1.428725827 | LGI2      | Up |
| ENSOCUG000000011625 | 2.039123853 | 1.027949405 | TTC12     | Up |
| ENSOCUG000000007603 | 2.511424246 | 1.328505758 | CHST15    | Up |
| ENSOCUG000000006962 | 2.457631854 | 1.29726882  | ALDH1L2   | Up |
| ENSOCUG000000035389 | 2.008070515 | 1.005809932 | -         | Up |
| ENSOCUG000000002233 | 2.30037612  | 1.201869767 | HSH2D     | Up |
| ENSOCUG000000005351 | 2.087929154 | 1.06207276  | DENND1A   | Up |
| ENSOCUG000000017594 | 12.09111326 | 3.595875178 | -         | Up |
| ENSOCUG000000015888 | 2.05032174  | 1.035850318 | FBXO31    | Up |
| ENSOCUG000000010436 | 2.43613316  | 1.284592993 | LEF1      | Up |
| ENSOCUG000000015559 | 3.521228256 | 1.81607875  | DRC1      | Up |

|                    |             |             |           |    |
|--------------------|-------------|-------------|-----------|----|
| ENSOCUG00000008023 | 5.333400244 | 2.415055599 | ABCC9     | Up |
| ENSOCUG00000033568 | 9.102519975 | 3.186266002 | SMIM1     | Up |
| ENSOCUG00000006286 | 2.032271173 | 1.023092919 | -         | Up |
| ENSOCUG00000000280 | 20.57541062 | 4.362849317 | TAF3      | Up |
| ENSOCUG00000030304 | 6.778316856 | 2.760927078 | LINC00672 | Up |
| ENSOCUG00000036758 | 2.47675092  | 1.308448788 | OTUB2     | Up |
| ENSOCUG00000015384 | 2.125590568 | 1.087863731 | OXSM      | Up |
| ENSOCUG00000005331 | 2.035413187 | 1.02532169  | TMEM94    | Up |
| ENSOCUG00000023484 | 2.962543304 | 1.566836242 | -         | Up |
| ENSOCUG00000022479 | 3.457290275 | 1.789641738 | -         | Up |
| ENSOCUG00000020935 | 2.009431652 | 1.006787507 | MTCH1     | Up |
| ENSOCUG00000025816 | 24.58584501 | 4.619756036 | -         | Up |
| ENSOCUG00000023753 | 2.282704694 | 1.190744235 | -         | Up |
| ENSOCUG00000004543 | 2.076621154 | 1.054238044 | AIFM2     | Up |
| ENSOCUG00000012313 | 3.14564096  | 1.653354013 | -         | Up |
| ENSOCUG00000027716 | 10.76191332 | 3.427862687 | MSI1      | Up |
| ENSOCUG00000013823 | 2.076577745 | 1.054207886 | CCS       | Up |
| ENSOCUG00000017496 | Inf         | Inf         | VSX2      | Up |
| ENSOCUG00000035545 | Inf         | Inf         | SEBOX     | Up |
| ENSOCUG00000021373 | Inf         | Inf         | -         | Up |
| ENSOCUG00000016747 | 2.021124164 | 1.015157954 | PSMF1     | Up |
| ENSOCUG00000003332 | Inf         | Inf         | -         | Up |
| ENSOCUG00000021533 | 4.089328438 | 2.031863939 | -         | Up |
| ENSOCUG00000007675 | Inf         | Inf         | NETO1     | Up |
| ENSOCUG00000014730 | 3.765975615 | 1.913023658 | -         | Up |
| ENSOCUG00000002991 | 2.049137366 | 1.0350167   | CLCC1     | Up |
| ENSOCUG00000037050 | 2.974145281 | 1.572475122 | -         | Up |
| ENSOCUG00000023874 | 2.076500138 | 1.054153968 | -         | Up |
| ENSOCUG00000027740 | 2.058282996 | 1.041441354 | -         | Up |
| ENSOCUG00000000564 | 2.019689048 | 1.014133192 | CPNE2     | Up |
| ENSOCUG00000005091 | 2.090600529 | 1.063917419 | SERPINB9  | Up |
| ENSOCUG00000014304 | 2.044956975 | 1.03207049  | CRTC3     | Up |
| ENSOCUG00000017408 | 2.055398588 | 1.039418192 | -         | Up |
| ENSOCUG00000025029 | 3.973986273 | 1.990586889 | CSF1      | Up |
| ENSOCUG00000001203 | 2.136383331 | 1.095170533 | HIVEP3    | Up |
| ENSOCUG00000027239 | 8.170449833 | 3.03041551  | -         | Up |
| ENSOCUG00000002135 | 2.053990081 | 1.038429215 | TAP1      | Up |
| ENSOCUG00000010380 | 2.028194735 | 1.020196178 | -         | Up |
| ENSOCUG00000039353 | 2.086362667 | 1.06098996  | -         | Up |
| ENSOCUG00000002994 | 2.994359818 | 1.582247593 | CCDC3     | Up |
| ENSOCUG00000011077 | 3.20220628  | 1.679066246 | ITIH3     | Up |
| ENSOCUG00000026402 | Inf         | Inf         | -         | Up |
| ENSOCUG00000022938 | Inf         | Inf         | TRARG1    | Up |
| ENSOCUG00000015935 | 2.126904454 | 1.088755226 | TCF7      | Up |

|                      |             |              |          |      |
|----------------------|-------------|--------------|----------|------|
| ENSOCUG00000000098   | 2.961461588 | 1.566309373  | SLC16A10 | Up   |
| ENSOCUG00000015548   | 2.001020488 | 1.000735939  | PEAK1    | Up   |
| ENSOCUG00000006388   | 2.645629283 | 1.403610919  | -        | Up   |
| ENSOCUG00000008118   | 3.08507836  | 1.625307134  | LYPD6    | Up   |
| ENSOCUG00000002611   | 2.021544061 | 1.015457649  | PELI2    | Up   |
| ENSOCUG00000039585   | 3.626948711 | 1.858756344  | PRRT4    | Up   |
| ENSOCUG00000009743   | 2.033027565 | 1.023629776  | MTMR4    | Up   |
| ENSOCUG000000026189  | 4.159825122 | 2.056522879  | DUSP29   | Up   |
| ENSOCUG00000000446   | 2.185792154 | 1.128156222  | BCAT2    | Up   |
| ENSOCUG000000021344  | 2.130622501 | 1.091275002  | -        | Up   |
| ENSOCUG00000008758   | 2.036051931 | 1.025774359  | TEAD2    | Up   |
| ENSOCUG00000010424   | 2.313350656 | 1.209983965  | TNNI1    | Up   |
| ENSOCUG000000027279  | 6.22436791  | 2.637927338  | CHRND    | Up   |
| ENSOCUG00000000539   | 2.447843249 | 1.291511176  | KCNMB1   | Up   |
| ENSOCUG00000005379   | 2.07659181  | 1.054217657  | ANXA6    | Up   |
| ENSOCUG00000007521   | 2.022463268 | 1.016113501  | -        | Up   |
| ENSOCUG00000016613   | 0.0043741   | -7.836798236 | RNF222   | Down |
| ENSOCUG00000014705   | 0.011869444 | -6.39660379  | NEU2     | Down |
| ENSOCUG00000008547   | 0.011341824 | -6.462203486 | -        | Down |
| ENSOCUG00000012440   | 0.041605745 | -4.587073439 | PRRG4    | Down |
| ENSOCUG00000015830   | 0.035751633 | -4.805847058 | ASPRV1   | Down |
| ENSOCUG00000013357   | 0.036802572 | -4.764049577 | GRHL3    | Down |
| ENSOCUG00000015200   | 0.020395706 | -5.615590766 | C1orf68  | Down |
| ENSOCUG000000027003  | 0.036878054 | -4.761093644 | -        | Down |
| ENSOCUG000000033213  | 0.008519578 | -6.875002301 | -        | Down |
| ENSOCUG00000017782   | 0.041133358 | -4.60354732  | ACE2     | Down |
| ENSOCUG000000026830  | 0.04505802  | -4.472072287 | -        | Down |
| ENSOCUG00000000632   | 0.050195424 | -4.31630034  | CLDN23   | Down |
| ENSOCUG000000030919  | 0.03059275  | -5.030666409 | -        | Down |
| ENSOCUG00000007495   | 0.007845106 | -6.993991262 | RNASE1   | Down |
| ENSOCUG000000034595  | 0.036282487 | -4.784582857 | -        | Down |
| ENSOCUG000000029278  | 0.084171009 | -3.570532778 | KRT78    | Down |
| ENSOCUG000000027934  | 0.065423967 | -3.934036959 | -        | Down |
| ENSOCUG00000005107   | 0.097369668 | -3.360383765 | HOPX     | Down |
| ENSOCUG000000002710  | 0.063358312 | -3.980322284 | CASP14   | Down |
| ENSOCUG000000007574  | 0.099914312 | -3.323164843 | KLK7     | Down |
| ENSOCUG000000023532  | 0.027270834 | -5.196497383 | -        | Down |
| ENSOCUG0000000023491 | 0.100862318 | -3.309540814 | C6orf132 | Down |
| ENSOCUG00000017320   | 0.075810948 | -3.721449983 | RNF227   | Down |
| ENSOCUG000000002305  | 0.103659675 | -3.270073321 | ZNF750   | Down |
| ENSOCUG000000029139  | 0.005968791 | -7.388345623 | CPA4     | Down |
| ENSOCUG000000025918  | 0.079904527 | -3.645578956 | H2AC19   | Down |
| ENSOCUG000000012345  | 0.118086216 | -3.082087527 | PPIF     | Down |
| ENSOCUG000000002222  | 0.029636973 | -5.076458062 | -        | Down |

|                     |             |              |          |      |
|---------------------|-------------|--------------|----------|------|
| ENSOCUG00000017569  | 0.056797297 | -4.138033917 | SLC5A1   | Down |
| ENSOCUG00000012034  | 0.12567723  | -2.992204811 | RBM47    | Down |
| ENSOCUG00000006494  | 0.036326689 | -4.782826327 | CNFN     | Down |
| ENSOCUG00000029634  | 0.125003834 | -2.999555754 | ALOXE3   | Down |
| ENSOCUG00000007958  | 0.042840352 | -4.544885841 | LY6G6C   | Down |
| ENSOCUG00000017247  | 0.043639742 | -4.518213614 | CYP4F22  | Down |
| ENSOCUG00000026146  | 0.13227543  | -2.918382986 | -        | Down |
| ENSOCUG000000025990 | 0.085884512 | -3.541458199 | PRSS27   | Down |
| ENSOCUG00000004348  | 0.120199771 | -3.056493944 | -        | Down |
| ENSOCUG00000017717  | 0.14397091  | -2.796150752 | GRHL1    | Down |
| ENSOCUG00000026273  | 0.055210227 | -4.178920658 | SERPINA3 | Down |
| ENSOCUG00000029925  | 0.030255616 | -5.046653246 | -        | Down |
| ENSOCUG00000001183  | 0.063968407 | -3.966496642 | SH3GL2   | Down |
| ENSOCUG00000016959  | 0.112860244 | -3.147390717 | CRYBG2   | Down |
| ENSOCUG00000010917  | 0.154782625 | -2.691684563 | SBSN     | Down |
| ENSOCUG00000011634  | 0.018969294 | -5.720190227 | SMPD3    | Down |
| ENSOCUG00000009682  | 0.029660549 | -5.075310873 | GSDMA    | Down |
| ENSOCUG000000022882 | 0.111555027 | -3.164172573 | NEURL2   | Down |
| ENSOCUG00000012899  | 0.150045821 | -2.736524958 | -        | Down |
| ENSOCUG00000005661  | 0.024730163 | -5.337584423 | XKRX     | Down |
| ENSOCUG00000004655  | 0.068521543 | -3.867298553 | -        | Down |
| ENSOCUG00000015864  | 0.148622603 | -2.750274555 | ABLIM1   | Down |
| ENSOCUG00000008805  | 0.153817275 | -2.700710558 | CDH1     | Down |
| ENSOCUG00000001858  | 0.058719785 | -4.090009498 | ICOS     | Down |
| ENSOCUG00000013920  | 0.064464654 | -3.955347833 | KRT80    | Down |
| ENSOCUG00000010998  | 0.038628983 | -4.694172497 | -        | Down |
| ENSOCUG00000001988  | 0           | -Inf         | -        | Down |
| ENSOCUG000000022981 | 0.07942892  | -3.654191806 | ATP6V1C2 | Down |
| ENSOCUG00000021689  | 0.077326934 | -3.692885176 | KLK5     | Down |
| ENSOCUG00000001242  | 0.158803638 | -2.654684133 | ESRP2    | Down |
| ENSOCUG00000007555  | 0.020644549 | -5.598095287 | PGLYRP2  | Down |
| ENSOCUG00000015993  | 0.138762057 | -2.849314962 | PARD6B   | Down |
| ENSOCUG00000004502  | 0.137995198 | -2.857310027 | -        | Down |
| ENSOCUG00000025640  | 0.044991959 | -4.474188999 | -        | Down |
| ENSOCUG00000029538  | 0.114965029 | -3.12073302  | FLVCR2   | Down |
| ENSOCUG00000010469  | 0.158729103 | -2.65536142  | SLC22A23 | Down |
| ENSOCUG00000005043  | 0.129378262 | -2.950332852 | LIPH     | Down |
| ENSOCUG00000002636  | 0.14340309  | -2.801851981 | FAM160A1 | Down |
| ENSOCUG00000022280  | 0.11029491  | -3.180561879 | TMEM45B  | Down |
| ENSOCUG00000022565  | 0.055457223 | -4.172480817 | -        | Down |
| ENSOCUG00000004964  | 0.117910886 | -3.084231177 | OCLN     | Down |
| ENSOCUG00000005959  | 0.027392524 | -5.190073986 | ALOX12B  | Down |
| ENSOCUG00000038237  | 0.082925481 | -3.59204072  | -        | Down |
| ENSOCUG00000027227  | 0.02245522  | -5.476805322 | H2BC3    | Down |

|                    |             |              |          |      |
|--------------------|-------------|--------------|----------|------|
| ENSOCUG00000012131 | 0.046608503 | -4.423263023 | SULT2B1  | Down |
| ENSOCUG00000014346 | 0.182119166 | -2.45704534  | C1orf116 | Down |
| ENSOCUG00000005907 | 0.018097145 | -5.788094057 | -        | Down |
| ENSOCUG00000000740 | 0.177208714 | -2.496478545 | CTSA     | Down |
| ENSOCUG00000025530 | 0.093812578 | -3.414074817 | C5AR2    | Down |
| ENSOCUG00000031173 | 0.132017702 | -2.921196703 | -        | Down |
| ENSOCUG00000001870 | 0.040401449 | -4.629449165 | FAM180A  | Down |
| ENSOCUG00000032235 | 0.021470551 | -5.541496946 | LCE1B    | Down |
| ENSOCUG00000015787 | 0.114895478 | -3.121606076 | BFSP1    | Down |
| ENSOCUG00000017322 | 0.187260689 | -2.416880025 | -        | Down |
| ENSOCUG00000010358 | 0.081257552 | -3.621354296 | CLDN4    | Down |
| ENSOCUG00000005577 | 0.159865934 | -2.645065553 | C15orf62 | Down |
| ENSOCUG00000006280 | 0.038502376 | -4.698908718 | CDSN     | Down |
| ENSOCUG00000015828 | 0.189353578 | -2.400845409 | MPZL3    | Down |
| ENSOCUG00000011541 | 0.07899426  | -3.662108356 | ILDR1    | Down |
| ENSOCUG00000008623 | 0.091392669 | -3.451777752 | -        | Down |
| ENSOCUG00000002367 | 0.194927416 | -2.358991079 | NECTIN4  | Down |
| ENSOCUG00000012195 | 0.033444607 | -4.902082597 | SPATA25  | Down |
| ENSOCUG00000015248 | 0.147076514 | -2.765361205 | SHISA2   | Down |
| ENSOCUG00000029636 | 0.153716551 | -2.701655579 | TGFA     | Down |
| ENSOCUG00000025743 | 0.036647916 | -4.770125028 | MAL2     | Down |
| ENSOCUG00000003870 | 0           | -Inf         | FGF19    | Down |
| ENSOCUG00000009799 | 0.160171129 | -2.642313968 | ZBTB43   | Down |
| ENSOCUG00000021700 | 0.187618786 | -2.414123805 | -        | Down |
| ENSOCUG00000016923 | 0.19683175  | -2.344965143 | PCDH1    | Down |
| ENSOCUG00000004704 | 0.191392138 | -2.385396525 | BNIP1    | Down |
| ENSOCUG00000013957 | 0.192170627 | -2.379540258 | LGALS1   | Down |
| ENSOCUG00000026869 | 0.102370863 | -3.288122945 | OVOL1    | Down |
| ENSOCUG00000002660 | 0.183310041 | -2.44764228  | CALHM5   | Down |
| ENSOCUG00000011446 | 0.015277206 | -6.032475477 | LHFPL5   | Down |
| ENSOCUG00000014955 | 0.067833142 | -3.88186587  | ANXA9    | Down |
| ENSOCUG00000003544 | 0.178842127 | -2.483241488 | MAL      | Down |
| ENSOCUG00000004617 | 0.20138571  | -2.311966779 | ANKRD22  | Down |
| ENSOCUG00000002864 | 0.100807153 | -3.310330086 | BLNK     | Down |
| ENSOCUG00000001405 | 0.189574771 | -2.399161115 | ABTB2    | Down |
| ENSOCUG00000006223 | 0.114531192 | -3.126187529 | EPCAM    | Down |
| ENSOCUG00000023928 | 0.047444405 | -4.397618222 | -        | Down |
| ENSOCUG00000012411 | 0.14631872  | -2.772813732 | UHMK1    | Down |
| ENSOCUG00000014245 | 0.202893095 | -2.301208325 | METRNL   | Down |
| ENSOCUG00000037791 | 0.013621563 | -6.197963923 | SPINK7   | Down |
| ENSOCUG00000022899 | 0.220870521 | -2.178727216 | LLGL2    | Down |
| ENSOCUG00000017054 | 0.077721126 | -3.685549396 | TEX33    | Down |
| ENSOCUG00000011525 | 0.092353747 | -3.436685701 | PPL      | Down |
| ENSOCUG00000015660 | 0.089384936 | -3.483824474 | -        | Down |

|                     |             |              |          |      |
|---------------------|-------------|--------------|----------|------|
| ENSOCUG00000026310  | 0.220307777 | -2.182407672 | CASZ1    | Down |
| ENSOCUG00000021306  | 0           | -Inf         | -        | Down |
| ENSOCUG00000001098  | 0.032071383 | -4.962569639 | DTHD1    | Down |
| ENSOCUG000000011277 | 0.01232816  | -6.341898662 | -        | Down |
| ENSOCUG00000000592  | 0.200856968 | -2.315759583 | RDH12    | Down |
| ENSOCUG00000016758  | 0.029572103 | -5.079619356 | -        | Down |
| ENSOCUG00000020941  | 0.083035753 | -3.590123541 | -        | Down |
| ENSOCUG00000008673  | 0.078927789 | -3.663322856 | ATG9B    | Down |
| ENSOCUG00000008639  | 0.058327521 | -4.09967944  | BNIP5    | Down |
| ENSOCUG00000002719  | 0.107353423 | -3.219559904 | EPN3     | Down |
| ENSOCUG00000008418  | 0.077846012 | -3.683233049 | B4GALNT3 | Down |
| ENSOCUG00000010627  | 0.162684421 | -2.619851992 | DENND1C  | Down |
| ENSOCUG00000025593  | 0.079679166 | -3.649653641 | -        | Down |
| ENSOCUG000000031181 | 0.098058321 | -3.350216133 | TGM1     | Down |
| ENSOCUG00000016366  | 0.164674084 | -2.602314569 | DNAJB9   | Down |
| ENSOCUG00000014447  | 0.092337335 | -3.436942088 | -        | Down |
| ENSOCUG00000017861  | 0.043728968 | -4.515266884 | LRAT     | Down |
| ENSOCUG00000010456  | 0.075330954 | -3.730613399 | RASGEF1B | Down |
| ENSOCUG00000029467  | 0.225547393 | -2.148497482 | TMEM154  | Down |
| ENSOCUG00000013779  | 0.084352761 | -3.567420901 | FOXN1    | Down |
| ENSOCUG000000037351 | 0.02035391  | -5.618550222 | -        | Down |
| ENSOCUG00000022921  | 0.230170808 | -2.119223223 | CAMSAP3  | Down |
| ENSOCUG00000005904  | 0.229263077 | -2.124924067 | -        | Down |
| ENSOCUG000000025487 | 0.225310199 | -2.150015477 | MBP      | Down |
| ENSOCUG00000007938  | 0.114996564 | -3.120337344 | -        | Down |
| ENSOCUG00000002296  | 0.224423024 | -2.155707406 | -        | Down |
| ENSOCUG00000000181  | 0.063055746 | -3.98722834  | GPR39    | Down |
| ENSOCUG000000006779 | 0.115166235 | -3.118210287 | -        | Down |
| ENSOCUG00000014482  | 0.166467757 | -2.586685325 | PLXDC2   | Down |
| ENSOCUG00000011211  | 0.017888998 | -5.804783606 | CKMT2    | Down |
| ENSOCUG00000033424  | 0           | -Inf         | -        | Down |
| ENSOCUG00000017035  | 0.031775293 | -4.975950772 | -        | Down |
| ENSOCUG00000026002  | 0.122200239 | -3.032680988 | -        | Down |
| ENSOCUG00000001548  | 0.074388991 | -3.748767067 | RASEF    | Down |
| ENSOCUG00000003581  | 0.145821278 | -2.777726843 | WWC1     | Down |
| ENSOCUG00000000356  | 0.231518657 | -2.110799634 | GBA      | Down |
| ENSOCUG00000012439  | 0.217029937 | -2.204034031 | ACER2    | Down |
| ENSOCUG000000032580 | 0.091406619 | -3.451557547 | -        | Down |
| ENSOCUG00000004469  | 0.138629614 | -2.850692614 | ZDHHC13  | Down |
| ENSOCUG00000024878  | 0.005328817 | -7.551968887 | H2AC6    | Down |
| ENSOCUG00000003500  | 0.170884457 | -2.548906912 | LRATD2   | Down |
| ENSOCUG00000012215  | 0.022931508 | -5.446524972 | TRPV3    | Down |
| ENSOCUG00000026264  | 0.237636723 | -2.073170294 | -        | Down |
| ENSOCUG00000008513  | 0.248468768 | -2.008863573 | MYO1D    | Down |

|                     |             |              |           |      |
|---------------------|-------------|--------------|-----------|------|
| ENSOCUG00000016556  | 0.070506364 | -3.826102716 | GPRC5A    | Down |
| ENSOCUG00000002770  | 0.178594935 | -2.485236925 | FAM3D     | Down |
| ENSOCUG000000036170 | 0.009109355 | -6.778435339 | -         | Down |
| ENSOCUG000000006829 | 0.23028364  | -2.118516174 | ARHGEF37  | Down |
| ENSOCUG00000002887  | 0.190687003 | -2.390721581 | FRMD4B    | Down |
| ENSOCUG00000010366  | 0.250800838 | -1.995385924 | -         | Down |
| ENSOCUG000000030473 | 0.131121301 | -2.931026017 | -         | Down |
| ENSOCUG000000013019 | 0.182773204 | -2.451873519 | -         | Down |
| ENSOCUG000000025548 | 0.11213366  | -3.156708693 | SLC19A2   | Down |
| ENSOCUG00000003954  | 0.22184949  | -2.172346858 | TMEM86A   | Down |
| ENSOCUG000000012460 | 0.180649277 | -2.468736611 | PLK3      | Down |
| ENSOCUG000000030506 | 0.085552271 | -3.547050044 | -         | Down |
| ENSOCUG000000001234 | 0.261480933 | -1.935222343 | NIPAL4    | Down |
| ENSOCUG000000014777 | 0.046516578 | -4.426111211 | PADI2     | Down |
| ENSOCUG000000001813 | 0.003802109 | -8.038984359 | ARG1      | Down |
| ENSOCUG000000005558 | 0.052294038 | -4.257209708 | PXDNL     | Down |
| ENSOCUG000000015820 | 0.064303675 | -3.958955006 | MXD1      | Down |
| ENSOCUG000000005502 | 0.033382049 | -4.90478369  | PRR9      | Down |
| ENSOCUG000000004720 | 0.010890852 | -6.520739381 | TMPRSS11F | Down |
| ENSOCUG000000009365 | 0.185847214 | -2.427811037 | ST14      | Down |
| ENSOCUG000000017926 | 0.010416613 | -6.584969953 | ABCA12    | Down |
| ENSOCUG000000013892 | 0.266013013 | -1.910431272 | TACSTD2   | Down |
| ENSOCUG000000007002 | 0.174034935 | -2.522551158 | -         | Down |
| ENSOCUG000000002358 | 0.209496492 | -2.255002011 | ARHGAP30  | Down |
| ENSOCUG000000022624 | 0.10512567  | -3.249813102 | SLC26A9   | Down |
| ENSOCUG000000010367 | 0.094798628 | -3.39899001  | ZDHHC21   | Down |
| ENSOCUG000000007342 | 0           | -Inf         | -         | Down |
| ENSOCUG000000006574 | 0.007719185 | -7.0173357   | PLA2G2E   | Down |
| ENSOCUG000000012534 | 0.041442774 | -4.592735601 | DSC1      | Down |
| ENSOCUG000000015495 | 0.151059016 | -2.726815799 | PRDMI     | Down |
| ENSOCUG000000011294 | 0.217287679 | -2.202321726 | -         | Down |
| ENSOCUG000000022883 | 0.134238059 | -2.897134332 | GDPD3     | Down |
| ENSOCUG000000001326 | 0.244312761 | -2.033198875 | SEMA4A    | Down |
| ENSOCUG000000005054 | 0.046778849 | -4.41799984  | RNF183    | Down |
| ENSOCUG000000012016 | 0.016602473 | -5.912457996 | SEMA3D    | Down |
| ENSOCUG000000031729 | 0.036099945 | -4.791859548 | LCE1C     | Down |
| ENSOCUG000000009796 | 0.006760934 | -7.208561735 | AQP9      | Down |
| ENSOCUG000000024652 | 0.086262721 | -3.535118971 | THAP5     | Down |
| ENSOCUG000000017211 | 0.186967822 | -2.4191381   | HMBOX1    | Down |
| ENSOCUG000000024109 | 0.054220797 | -4.205009867 | -         | Down |
| ENSOCUG000000027315 | 0.051726654 | -4.272948311 | -         | Down |
| ENSOCUG000000023717 | 0.201247199 | -2.312959389 | CNKSR1    | Down |
| ENSOCUG000000033572 | 0.152672817 | -2.711484876 | -         | Down |
| ENSOCUG000000010604 | 0.276584417 | -1.854208218 | -         | Down |



|                     |             |              |         |      |
|---------------------|-------------|--------------|---------|------|
| ENSOCUG00000010152  | 0.275503882 | -1.859855448 | SCNN1A  | Down |
| ENSOCUG00000029487  | 0.005212826 | -7.583718637 | C6orf15 | Down |
| ENSOCUG00000003828  | 0.056241804 | -4.152213314 | CERS3   | Down |
| ENSOCUG00000029033  | 0.207865833 | -2.266275455 | -       | Down |
| ENSOCUG00000016270  | 0.101290635 | -3.303427306 | EPGN    | Down |
| ENSOCUG00000022857  | 0.250821689 | -1.995265991 | EFNB2   | Down |
| ENSOCUG00000008628  | 0.230404554 | -2.117758861 | PNPLA1  | Down |
| ENSOCUG00000015475  | 0.130941577 | -2.933004833 | USP43   | Down |
| ENSOCUG00000003423  | 0.033340758 | -4.906569278 | SDR9C7  | Down |
| ENSOCUG00000007853  | 0.27226596  | -1.876911474 | -       | Down |
| ENSOCUG00000000574  | 0.183948479 | -2.442626349 | PLEKHH1 | Down |
| ENSOCUG00000016524  | 0.259464176 | -1.946392735 | TIAM1   | Down |
| ENSOCUG00000016867  | 0.037775613 | -4.726401036 | SYT16   | Down |
| ENSOCUG00000007759  | 0.250851677 | -1.995093512 | USP2    | Down |
| ENSOCUG00000005614  | 0.271167628 | -1.882743135 | TTC9    | Down |
| ENSOCUG00000011842  | 0.050816054 | -4.298571838 | CRNN    | Down |
| ENSOCUG00000015653  | 0.124094923 | -3.010484007 | RNF39   | Down |
| ENSOCUG000000029474 | 0.262833861 | -1.927776943 | -       | Down |
| ENSOCUG000000033562 | 0           | -Inf         | H2BU1   | Down |
| ENSOCUG000000025569 | 0.215808255 | -2.212178046 | CCR7    | Down |
| ENSOCUG000000027145 | 0           | -Inf         | -       | Down |
| ENSOCUG000000027528 | 0.273678865 | -1.869444069 | PHACTR4 | Down |
| ENSOCUG000000034297 | 0.263843917 | -1.922243375 | -       | Down |
| ENSOCUG00000016129  | 0.225752058 | -2.147188953 | -       | Down |
| ENSOCUG00000017169  | 0.029247981 | -5.095519167 | -       | Down |
| ENSOCUG00000013921  | 0.189904958 | -2.396650526 | NXPH3   | Down |
| ENSOCUG000000033658 | 0.105496199 | -3.244737076 | PAQR5   | Down |
| ENSOCUG000000026068 | 0.271161795 | -1.882774167 | LDLRAD3 | Down |
| ENSOCUG000000038970 | 0.013676902 | -6.19211468  | RNF225  | Down |
| ENSOCUG000000037250 | 0           | -Inf         | -       | Down |
| ENSOCUG000000005298 | 0.284639047 | -1.812794508 | -       | Down |
| ENSOCUG000000009917 | 0.100201428 | -3.319025026 | DNAH3   | Down |
| ENSOCUG000000022858 | 0.034919387 | -4.839827965 | RAB27B  | Down |
| ENSOCUG00000014669  | 0.268783249 | -1.895484865 | TRMT6   | Down |
| ENSOCUG000000004549 | 0.227594625 | -2.135461608 | CYP51A1 | Down |
| ENSOCUG000000001049 | 0.085530797 | -3.547412198 | SLC5A7  | Down |
| ENSOCUG000000004730 | 0.10958733  | -3.189847086 | SYBU    | Down |
| ENSOCUG000000003316 | 0.052580075 | -4.24934     | -       | Down |
| ENSOCUG000000007812 | 0.143265986 | -2.80323197  | KPNA5   | Down |
| ENSOCUG00000001100  | 0.266354435 | -1.908580792 | SOX15   | Down |
| ENSOCUG000000008414 | 0.269895166 | -1.889528956 | RDH10   | Down |
| ENSOCUG00000012070  | 0.042022872 | -4.572681428 | SPNS2   | Down |
| ENSOCUG000000025069 | 0.047449723 | -4.397456514 | -       | Down |
| ENSOCUG000000025273 | 0.022939835 | -5.44600116  | -       | Down |

|                    |             |              |           |      |
|--------------------|-------------|--------------|-----------|------|
| ENSOCUG00000024702 | 0.027567559 | -5.180884657 | -         | Down |
| ENSOCUG00000006863 | 0.070060257 | -3.835259907 | SERPINB8  | Down |
| ENSOCUG00000014760 | 0.187620796 | -2.414108346 | MEGF11    | Down |
| ENSOCUG00000005334 | 0.164524519 | -2.603625495 | ELOVL4    | Down |
| ENSOCUG00000010635 | 0.201347699 | -2.31223911  | -         | Down |
| ENSOCUG00000014548 | 0.304621236 | -1.714911577 | EVPL      | Down |
| ENSOCUG00000002384 | 0.287149712 | -1.800124979 | NPAS2     | Down |
| ENSOCUG00000000085 | 0.276546333 | -1.854406882 | TM2D2     | Down |
| ENSOCUG00000023091 | 0.013130514 | -6.25093284  | -         | Down |
| ENSOCUG00000004511 | 0.295895781 | -1.75683897  | HSPB8     | Down |
| ENSOCUG00000007602 | 0.055981164 | -4.158914705 | HS3ST1    | Down |
| ENSOCUG00000011984 | 0.283732968 | -1.817394304 | -         | Down |
| ENSOCUG00000006632 | 0.126332337 | -2.98470412  | MREG      | Down |
| ENSOCUG00000006562 | 0.019209185 | -5.702059887 | LANCL3    | Down |
| ENSOCUG00000004094 | 0.295957565 | -1.756537761 | OSER1     | Down |
| ENSOCUG00000016641 | 0.218871353 | -2.191844955 | -         | Down |
| ENSOCUG00000007502 | 0.298056824 | -1.746340693 | ELF3      | Down |
| ENSOCUG00000014604 | 0.059827878 | -4.063038289 | TMPRSS11E | Down |
| ENSOCUG00000002304 | 0.291547699 | -1.778196157 | CLIP1     | Down |
| ENSOCUG00000025659 | 0           | -Inf         | -         | Down |
| ENSOCUG00000010693 | 0.13319328  | -2.908406795 | CCN3      | Down |
| ENSOCUG00000026551 | 0.300557242 | -1.734288312 | LPAR5     | Down |
| ENSOCUG00000005139 | 0.233875288 | -2.096188667 | HIVEP2    | Down |
| ENSOCUG00000014425 | 0.289075897 | -1.790479772 | FILIP1L   | Down |
| ENSOCUG00000008806 | 0.04375807  | -4.514307066 | SPINK6    | Down |
| ENSOCUG00000008599 | 0.094593825 | -3.402110179 | DLX5      | Down |
| ENSOCUG00000008893 | 0.309289636 | -1.692969604 | EMC7      | Down |
| ENSOCUG00000036368 | 0           | -Inf         | -         | Down |
| ENSOCUG00000004595 | 0.293683732 | -1.767664744 | LLPH      | Down |
| ENSOCUG00000002306 | 0.040928512 | -4.610749976 | PRSS8     | Down |
| ENSOCUG00000008863 | 0.31072966  | -1.686268139 | PNRC1     | Down |
| ENSOCUG00000025017 | 0.27202327  | -1.878198022 | -         | Down |
| ENSOCUG00000013004 | 0.039041863 | -4.678834283 | ADGRF2    | Down |
| ENSOCUG00000010272 | 0.162044654 | -2.625536668 | ACP3      | Down |
| ENSOCUG00000023757 | 0.038757239 | -4.689390392 | NOS3      | Down |
| ENSOCUG00000015511 | 0.04391817  | -4.509038247 | ABHD12B   | Down |
| ENSOCUG00000007272 | 0.057126233 | -4.129702797 | CCDC186   | Down |
| ENSOCUG00000017009 | 0.154181036 | -2.697302764 | -         | Down |
| ENSOCUG00000007366 | 0.082799827 | -3.594228428 | ENDOU     | Down |
| ENSOCUG00000004238 | 0.290223675 | -1.784762881 | -         | Down |
| ENSOCUG00000026883 | 0.211104961 | -2.24396761  | DNASE1L2  | Down |
| ENSOCUG00000015007 | 0.141501973 | -2.821105923 | SPNS3     | Down |
| ENSOCUG00000013854 | 0.09698506  | -3.366093667 | CEP85L    | Down |
| ENSOCUG00000001029 | 0.038641222 | -4.693715471 | CDH17     | Down |

|                     |             |              |           |      |
|---------------------|-------------|--------------|-----------|------|
| ENSOCUG00000016969  | 0.252395856 | -1.986239871 | AMMECR1   | Down |
| ENSOCUG00000025279  | 0.264398524 | -1.919213973 | C9orf152  | Down |
| ENSOCUG00000015524  | 0.195270808 | -2.356451804 | PAPPA2    | Down |
| ENSOCUG00000012518  | 0.066062589 | -3.920022675 | DSC2      | Down |
| ENSOCUG00000020975  | 0.327259904 | -1.61149124  | CSTB      | Down |
| ENSOCUG00000005200  | 0           | -Inf         | -         | Down |
| ENSOCUG00000029247  | 0.091650994 | -3.447705668 | -         | Down |
| ENSOCUG00000004924  | 0.306966849 | -1.703845237 | NHLRC2    | Down |
| ENSOCUG00000007526  | 0.317434343 | -1.655469874 | CTH       | Down |
| ENSOCUG00000024510  | 0.086028063 | -3.539048838 | -         | Down |
| ENSOCUG00000004035  | 0.32595799  | -1.617242056 | IRF6      | Down |
| ENSOCUG00000014188  | 0.040439133 | -4.628104121 | NPY4R     | Down |
| ENSOCUG00000017694  | 0.21510272  | -2.216902328 | KRT23     | Down |
| ENSOCUG00000008078  | 0.320180405 | -1.643043078 | SPTLC1    | Down |
| ENSOCUG00000023535  | 0.2898818   | -1.786463335 | H2BC21    | Down |
| ENSOCUG00000002886  | 0.236900134 | -2.077649078 | ZNF329    | Down |
| ENSOCUG00000022674  | 0.319284836 | -1.647084058 | CLN8      | Down |
| ENSOCUG00000015182  | 0.297147908 | -1.750746869 | -         | Down |
| ENSOCUG00000002830  | 0.325100118 | -1.621044016 | TNS4      | Down |
| ENSOCUG00000001575  | 0.322139755 | -1.634241381 | SLC9A3R1  | Down |
| ENSOCUG00000014298  | 0.310954713 | -1.685223613 | DUOXA1    | Down |
| ENSOCUG00000017147  | 0.126456111 | -2.98329134  | CDS1      | Down |
| ENSOCUG00000001073  | 0.310458383 | -1.687528208 | GAN       | Down |
| ENSOCUG00000023433  | 0.093629055 | -3.416899894 | ITSN2     | Down |
| ENSOCUG00000004324  | 0.116856083 | -3.097195264 | ZFP42     | Down |
| ENSOCUG00000024282  | 0.208544086 | -2.261575695 | PLEKHB2   | Down |
| ENSOCUG00000001434  | 0.315183821 | -1.665734616 | SPTLC2    | Down |
| ENSOCUG00000004887  | 0.335920702 | -1.573807386 | RHOV      | Down |
| ENSOCUG00000012640  | 0.300093127 | -1.736517818 | CGN       | Down |
| ENSOCUG00000005255  | 0.093992766 | -3.411306463 | -         | Down |
| ENSOCUG00000002944  | 0.109739558 | -3.187844431 | SLC34A2   | Down |
| ENSOCUG00000002885  | 0.316989053 | -1.657495075 | AKTIP     | Down |
| ENSOCUG00000024543  | 0.06261809  | -3.99727668  | H2BC18    | Down |
| ENSOCUG00000027895  | 0.33761006  | -1.566570203 | -         | Down |
| ENSOCUG00000011835  | 0.215172473 | -2.216434571 | CXCL8     | Down |
| ENSOCUG00000002283  | 0.336826187 | -1.569923787 | LRATD1    | Down |
| ENSOCUG00000026281  | 0.322612298 | -1.632126659 | PAK6      | Down |
| ENSOCUG00000003434  | 0.318484229 | -1.650706161 | SLC49A4   | Down |
| ENSOCUG00000005865  | 0.257801538 | -1.955667222 | -         | Down |
| ENSOCUG00000001009  | 0.26851879  | -1.896905046 | NFE2L2    | Down |
| ENSOCUG000000009371 | 0.331624302 | -1.59237836  | RMND5A    | Down |
| ENSOCUG00000008971  | 0.132058309 | -2.920753019 | CPEB4     | Down |
| ENSOCUG00000010144  | 0.131522403 | -2.926619527 | TTC22     | Down |
| ENSOCUG00000025115  | 0.262956622 | -1.927103268 | MPHOSPH10 | Down |

|                     |             |              |          |      |
|---------------------|-------------|--------------|----------|------|
| ENSOCUG00000006847  | 0.241971224 | -2.04709261  | CHMP4C   | Down |
| ENSOCUG00000010489  | 0.042965885 | -4.540664594 | NLRP10   | Down |
| ENSOCUG000000031994 | 0.004739583 | -7.721024063 | TMEM238L | Down |
| ENSOCUG000000036714 | 0.282604035 | -1.823146033 | MPIG6B   | Down |
| ENSOCUG00000008619  | 0.187735798 | -2.413224318 | TMCC3    | Down |
| ENSOCUG000000027529 | 0.133094893 | -2.909472884 | ELOVL7   | Down |
| ENSOCUG00000014207  | 0.065472253 | -3.932972554 | ELF5     | Down |
| ENSOCUG000000009943 | 0.333272213 | -1.585227058 | SLC38A2  | Down |
| ENSOCUG00000010159  | 0.269673785 | -1.89071281  | FADS6    | Down |
| ENSOCUG00000002199  | 0.057893331 | -4.110459017 | GATA4    | Down |
| ENSOCUG00000017863  | 0.166213109 | -2.588893927 | RRP15    | Down |
| ENSOCUG00000000368  | 0.188349684 | -2.408514481 | THAP6    | Down |
| ENSOCUG000000005942 | 0.331220065 | -1.594138022 | KIF13B   | Down |
| ENSOCUG000000035346 | 0.089073168 | -3.488865277 | ARL5A    | Down |
| ENSOCUG00000015014  | 0.335747014 | -1.574553527 | KIF3C    | Down |
| ENSOCUG000000030000 | 0.018247241 | -5.776177815 | -        | Down |
| ENSOCUG000000003383 | 0.139469133 | -2.84198223  | MGAT4A   | Down |
| ENSOCUG000000005414 | 0.08474521  | -3.56072436  | ESF1     | Down |
| ENSOCUG000000017130 | 0.33603755  | -1.573305643 | TMEM33   | Down |
| ENSOCUG000000009573 | 0.326704331 | -1.613942514 | C18orf25 | Down |
| ENSOCUG000000017132 | 0.09261639  | -3.432588662 | -        | Down |
| ENSOCUG000000023564 | 0.042756781 | -4.547702964 | -        | Down |
| ENSOCUG000000016332 | 0.245796079 | -2.024466196 | CDC73    | Down |
| ENSOCUG000000007258 | 0.10407643  | -3.264284711 | STRN     | Down |
| ENSOCUG000000012416 | 0.196569315 | -2.346889966 | STON2    | Down |
| ENSOCUG000000002008 | 0.285406798 | -1.808908397 | STK36    | Down |
| ENSOCUG000000008346 | 0.330724219 | -1.596299395 | LYPD6B   | Down |
| ENSOCUG000000015909 | 0.268494326 | -1.897036497 | HBEGF    | Down |
| ENSOCUG000000013509 | 0.042060485 | -4.571390718 | SKIL     | Down |
| ENSOCUG000000011318 | 0.346802941 | -1.527811963 | KLF5     | Down |
| ENSOCUG000000007681 | 0.036509947 | -4.775566628 | FAM214A  | Down |
| ENSOCUG000000021026 | 0.179546703 | -2.477568937 | -        | Down |
| ENSOCUG000000014159 | 0.338404632 | -1.563178777 | KDSR     | Down |
| ENSOCUG000000003710 | 0.338075681 | -1.564581852 | SPPL2A   | Down |
| ENSOCUG000000010656 | 0.320763561 | -1.640417836 | TTC39B   | Down |
| ENSOCUG000000001054 | 0.288599832 | -1.792857636 | -        | Down |
| ENSOCUG000000005205 | 0.169092049 | -2.56411927  | -        | Down |
| ENSOCUG000000014349 | 0.089402995 | -3.483533022 | YOD1     | Down |
| ENSOCUG000000016248 | 0.292548252 | -1.773253497 | GRAMD2B  | Down |
| ENSOCUG000000017859 | 0.027903272 | -5.16342186  | RBM46    | Down |
| ENSOCUG000000016492 | 0.331948159 | -1.590970146 | -        | Down |
| ENSOCUG000000000121 | 0.300921137 | -1.73254265  | LRR1     | Down |
| ENSOCUG000000024341 | 0.33298332  | -1.586478182 | -        | Down |
| ENSOCUG000000008386 | 0.027588786 | -5.179774219 | GPA1     | Down |

|                     |             |              |          |      |
|---------------------|-------------|--------------|----------|------|
| ENSOCUG00000010690  | 0.086588316 | -3.529683832 | FAM126B  | Down |
| ENSOCUG00000001456  | 0.346310518 | -1.52986189  | -        | Down |
| ENSOCUG00000000068  | 0.149966431 | -2.737288494 | FRMPD1   | Down |
| ENSOCUG000000032147 | 0.346024149 | -1.531055366 | -        | Down |
| ENSOCUG00000012063  | 0.355031782 | -1.493979917 | JUP      | Down |
| ENSOCUG00000010996  | 0.345047834 | -1.535131717 | TFAP2C   | Down |
| ENSOCUG000000027657 | 0.352035216 | -1.50620834  | GRB7     | Down |
| ENSOCUG000000011082 | 0.359189343 | -1.477183546 | EPHA1    | Down |
| ENSOCUG000000025223 | 0.289421067 | -1.788758155 | PLCXD1   | Down |
| ENSOCUG000000039679 | 0.327586882 | -1.610050508 | -        | Down |
| ENSOCUG000000004644 | 0.347854887 | -1.523442508 | CCDC120  | Down |
| ENSOCUG000000029885 | 0.271074631 | -1.88323799  | -        | Down |
| ENSOCUG000000005658 | 0.104426837 | -3.25943557  | PDZRN4   | Down |
| ENSOCUG000000006552 | 0.156958512 | -2.671544828 | DNAJB14  | Down |
| ENSOCUG000000016740 | 0.162724246 | -2.619498867 | DPF3     | Down |
| ENSOCUG000000034283 | 0.295888241 | -1.75687573  | -        | Down |
| ENSOCUG000000009236 | 0.076464435 | -3.709067304 | FAM135A  | Down |
| ENSOCUG000000017700 | 0.023532264 | -5.409216091 | PLS1     | Down |
| ENSOCUG000000000831 | 0.060721949 | -4.041638089 | DNASE1L3 | Down |
| ENSOCUG000000011674 | 0.269544429 | -1.891405002 | BMP2     | Down |
| ENSOCUG000000016088 | 0.34090713  | -1.552549323 | ADRB2    | Down |
| ENSOCUG000000010667 | 0.338204311 | -1.564033045 | -        | Down |
| ENSOCUG000000007130 | 0.346469341 | -1.529200403 | SLC25A25 | Down |
| ENSOCUG000000003140 | 0.215113691 | -2.21682875  | NFE2L3   | Down |
| ENSOCUG000000015638 | 0.013862813 | -6.172636133 | ZNF518A  | Down |
| ENSOCUG000000015801 | 0.024159512 | -5.371264888 | -        | Down |
| ENSOCUG000000016138 | 0.332983502 | -1.586477395 | -        | Down |
| ENSOCUG000000010633 | 0.181014215 | -2.465825101 | HMOX1    | Down |
| ENSOCUG000000007932 | 0.153987867 | -2.699111409 | ZNF655   | Down |
| ENSOCUG000000014443 | 0.114650519 | -3.124685213 | SERPINB7 | Down |
| ENSOCUG000000004386 | 0.108555997 | -3.203488666 | NFAT5    | Down |
| ENSOCUG000000011658 | 0.133523256 | -2.904837053 | -        | Down |
| ENSOCUG000000013646 | 0.345444458 | -1.533474327 | -        | Down |
| ENSOCUG000000009614 | 0.229393917 | -2.124100962 | PHACTR2  | Down |
| ENSOCUG000000003035 | 0.09410451  | -3.40959232  | SLK      | Down |
| ENSOCUG000000007590 | 0.038440598 | -4.701225421 | SUCO     | Down |
| ENSOCUG000000011595 | 0.347788814 | -1.523716563 | USP14    | Down |
| ENSOCUG000000028058 | 0.134947355 | -2.889531395 | CHAC2    | Down |
| ENSOCUG000000008771 | 0.249366472 | -2.003660592 | IL1A     | Down |
| ENSOCUG000000012418 | 0.07474345  | -3.741909027 | FGF5     | Down |
| ENSOCUG000000007950 | 0.278514358 | -1.844176391 | CPEB2    | Down |
| ENSOCUG000000008291 | 0.21789665  | -2.198284079 | BIN2     | Down |
| ENSOCUG000000033697 | 0           | -Inf         | -        | Down |
| ENSOCUG000000017131 | 0.028483702 | -5.133719506 | LMOD2    | Down |

|                     |             |              |           |      |
|---------------------|-------------|--------------|-----------|------|
| ENSOCUG00000003283  | 0.084129383 | -3.571246433 | FCHO2     | Down |
| ENSOCUG00000014407  | 0.330510113 | -1.59723368  | NUP35     | Down |
| ENSOCUG00000007506  | 0.35189174  | -1.506796443 | MARCHF3   | Down |
| ENSOCUG00000002771  | 0.256957021 | -1.960401024 | TOB1      | Down |
| ENSOCUG00000009672  | 0.15931641  | -2.650033222 | -         | Down |
| ENSOCUG00000013448  | 0.340614428 | -1.553788548 | CNOT4     | Down |
| ENSOCUG00000024437  | 0.317791464 | -1.653847723 | -         | Down |
| ENSOCUG000000022118 | 0.361712911 | -1.467083001 | PSPH      | Down |
| ENSOCUG00000009850  | 0.271759238 | -1.879599016 | NPC1      | Down |
| ENSOCUG00000003400  | 0.357023358 | -1.485909628 | ZFP36     | Down |
| ENSOCUG000000023781 | 0.200184861 | -2.32059522  | -         | Down |
| ENSOCUG00000004320  | 0.065557094 | -3.931104293 | TMTC3     | Down |
| ENSOCUG000000026176 | 0.349887141 | -1.515038453 | LTB4R     | Down |
| ENSOCUG00000015756  | 0.028961836 | -5.109703115 | KNL1      | Down |
| ENSOCUG00000015839  | 0.361045163 | -1.46974878  | FAM83G    | Down |
| ENSOCUG00000015554  | 0.34968603  | -1.515867936 | SELENOI   | Down |
| ENSOCUG00000003854  | 0.145033456 | -2.785542356 | TPMT      | Down |
| ENSOCUG000000038545 | 0           | -Inf         | LY6G6D    | Down |
| ENSOCUG00000007047  | 0.354545405 | -1.495957696 | ZDHHC5    | Down |
| ENSOCUG00000003405  | 0.230330568 | -2.118222208 | MFSD6     | Down |
| ENSOCUG00000005652  | 0.126799163 | -2.979382875 | NOX1      | Down |
| ENSOCUG00000007348  | 0.126507593 | -2.982704121 | -         | Down |
| ENSOCUG000000003729 | 0.314341387 | -1.66959586  | NFRKB     | Down |
| ENSOCUG00000013737  | 0.187805974 | -2.41268514  | RBM25     | Down |
| ENSOCUG00000003240  | 0.352116151 | -1.505876691 | IRX5      | Down |
| ENSOCUG000000003961 | 0.297941306 | -1.746899947 | TXNRD1    | Down |
| ENSOCUG00000001336  | 0.356918682 | -1.486332679 | ARHGAP27  | Down |
| ENSOCUG000000017282 | 0.364640646 | -1.455452711 | LMTK2     | Down |
| ENSOCUG00000017365  | 0.171677875 | -2.542223974 | RBMS1     | Down |
| ENSOCUG00000012746  | 0.094544856 | -3.402857229 | STAG1     | Down |
| ENSOCUG00000012207  | 0.3137305   | -1.672402304 | NEBL      | Down |
| ENSOCUG00000012626  | 0.029252959 | -5.095273609 | TMPRSS11A | Down |
| ENSOCUG000000025993 | 0.164586943 | -2.603078209 | GIN1      | Down |
| ENSOCUG00000010003  | 0.351241045 | -1.50946665  | UTP3      | Down |
| ENSOCUG00000016211  | 0.104319553 | -3.260918508 | SNTB1     | Down |
| ENSOCUG00000017017  | 0.314601586 | -1.668402151 | CARNMT1   | Down |
| ENSOCUG00000015478  | 0.067754928 | -3.883530311 | CCL22     | Down |
| ENSOCUG000000026452 | 0.108439473 | -3.205038092 | -         | Down |
| ENSOCUG00000015577  | 0.13656757  | -2.872313163 | -         | Down |
| ENSOCUG00000006922  | 0.062696207 | -3.995478027 | JMJD1C    | Down |
| ENSOCUG00000012979  | 0.159226327 | -2.650849203 | NPTX1     | Down |
| ENSOCUG00000010085  | 0           | -Inf         | -         | Down |
| ENSOCUG000000037766 | 0.091198906 | -3.454839671 | -         | Down |
| ENSOCUG000000039627 | 0.095096368 | -3.394465949 | -         | Down |

|                    |             |              |          |      |
|--------------------|-------------|--------------|----------|------|
| ENSOCUG00000014405 | 0.219600648 | -2.187045782 | TFAM     | Down |
| ENSOCUG00000002929 | 0.244251002 | -2.033563616 | CATSPER4 | Down |
| ENSOCUG00000003769 | 0.369588926 | -1.436006564 | MSMO1    | Down |
| ENSOCUG00000011578 | 0.18513324  | -2.433364147 | BMP2K    | Down |
| ENSOCUG00000010208 | 0.213229779 | -2.229519158 | DNAJC2   | Down |
| ENSOCUG00000007730 | 0.375539447 | -1.412963639 | LAD1     | Down |
| ENSOCUG00000006225 | 0.256654391 | -1.962101149 | -        | Down |
| ENSOCUG00000011072 | 0.327131978 | -1.612055303 | CFLAR    | Down |
| ENSOCUG00000030494 | 0.332582179 | -1.588217227 | RSRC1    | Down |
| ENSOCUG00000029105 | 0.169820761 | -2.55791525  | ND3      | Down |
| ENSOCUG00000003925 | 0.180227295 | -2.472110574 | KRR1     | Down |
| ENSOCUG00000026691 | 0.368552964 | -1.440056135 | SLC31A2  | Down |
| ENSOCUG00000000383 | 0.113219829 | -3.142801441 | PLA2G4E  | Down |
| ENSOCUG00000016771 | 0.254184862 | -1.976049982 | PTGS2    | Down |
| ENSOCUG00000008779 | 0.051863111 | -4.269147443 | SPINK5   | Down |
| ENSOCUG00000031187 | 0.082675091 | -3.596403455 | -        | Down |
| ENSOCUG00000013829 | 0.046561632 | -4.424714567 | KCTD4    | Down |
| ENSOCUG00000003129 | 0.361560661 | -1.46769038  | WDR36    | Down |
| ENSOCUG00000012071 | 0.346688009 | -1.528290155 | GPAT3    | Down |
| ENSOCUG00000002127 | 0.334691977 | -1.579094128 | ZNF800   | Down |
| ENSOCUG00000011673 | 0.298207649 | -1.74561083  | -        | Down |
| ENSOCUG00000000776 | 0.304189235 | -1.716958995 | LEMD3    | Down |
| ENSOCUG00000014986 | 0.219800953 | -2.185730456 | ASH1L    | Down |
| ENSOCUG00000005888 | 0.074822966 | -3.740375031 | NIPBL    | Down |
| ENSOCUG00000014876 | 0.093810513 | -3.414106585 | ARL5B    | Down |
| ENSOCUG00000015173 | 0.349442326 | -1.516873729 | ZC3H13   | Down |
| ENSOCUG00000029614 | 0.358238885 | -1.48100615  | -        | Down |
| ENSOCUG00000014408 | 0.068451937 | -3.868764817 | TASOR2   | Down |
| ENSOCUG00000005142 | 0.131338308 | -2.928640324 | NPSR1    | Down |
| ENSOCUG00000003822 | 0.09999888  | -3.321944254 | FAM83B   | Down |
| ENSOCUG00000005329 | 0.008301385 | -6.912432163 | APOB     | Down |
| ENSOCUG00000003863 | 0.04010088  | -4.640222291 | CD74     | Down |
| ENSOCUG00000009046 | 0.370093146 | -1.434039676 | GFOD2    | Down |
| ENSOCUG00000009879 | 0.070560027 | -3.825005076 | STAG2    | Down |
| ENSOCUG00000009745 | 0.240312688 | -2.057015275 | MEGF9    | Down |
| ENSOCUG00000014485 | 0.370677651 | -1.431762959 | SPTBN2   | Down |
| ENSOCUG00000011991 | 0.110894235 | -3.172743727 | PANK3    | Down |
| ENSOCUG00000007844 | 0.209027435 | -2.258235785 | SOS1     | Down |
| ENSOCUG00000012117 | 0.071591693 | -3.804063989 | LTN1     | Down |
| ENSOCUG00000022586 | 0.015351012 | -6.025522438 | -        | Down |
| ENSOCUG00000004643 | 0.294894126 | -1.761731007 | WSB1     | Down |
| ENSOCUG00000013642 | 0.060634879 | -4.043708275 | DOCK11   | Down |
| ENSOCUG00000011397 | 0.107210068 | -3.2214877   | -        | Down |
| ENSOCUG00000001662 | 0.100091527 | -3.320608244 | SLC7A11  | Down |

|                     |             |              |          |      |
|---------------------|-------------|--------------|----------|------|
| ENSOCUG00000024654  | 0.026477234 | -5.239103795 | -        | Down |
| ENSOCUG00000026343  | 0           | -Inf         | VTGN1    | Down |
| ENSOCUG00000015408  | 0.28513498  | -1.810283058 | -        | Down |
| ENSOCUG00000006789  | 0.331095854 | -1.594679149 | UCLH3    | Down |
| ENSOCUG00000006495  | 0.366487993 | -1.448162164 | ABHD5    | Down |
| ENSOCUG00000016627  | 0.235792638 | -2.084409418 | LSR      | Down |
| ENSOCUG00000027642  | 0.28632882  | -1.804255203 | DNAJC24  | Down |
| ENSOCUG00000026643  | 0.17913865  | -2.480851453 | UGT2B16  | Down |
| ENSOCUG00000016605  | 0.263431324 | -1.924501189 | AKR1B1   | Down |
| ENSOCUG00000003698  | 0.376599827 | -1.408895759 | KLF3     | Down |
| ENSOCUG00000013557  | 0.235208982 | -2.087984943 | WNK1     | Down |
| ENSOCUG00000027838  | 0.053007713 | -4.237653896 | -        | Down |
| ENSOCUG000000039636 | 0.066789538 | -3.904234046 | -        | Down |
| ENSOCUG00000005466  | 0           | -Inf         | LRRC66   | Down |
| ENSOCUG00000017458  | 0.006909193 | -7.177267122 | NEB      | Down |
| ENSOCUG00000009402  | 0.146378447 | -2.772224954 | -        | Down |
| ENSOCUG00000007233  | 0.03528092  | -4.824967999 | -        | Down |
| ENSOCUG00000010548  | 0.041969589 | -4.57451187  | ARHGAP5  | Down |
| ENSOCUG00000009623  | 0.365638286 | -1.451510951 | -        | Down |
| ENSOCUG00000006660  | 0.190023708 | -2.395748667 | IL36G    | Down |
| ENSOCUG00000006776  | 0.364411974 | -1.456357731 | ODR4     | Down |
| ENSOCUG00000011218  | 0.248781363 | -2.007049683 | CFAP92   | Down |
| ENSOCUG00000007779  | 0.102533815 | -3.285828317 | USP16    | Down |
| ENSOCUG00000017789  | 0.384090508 | -1.380481782 | -        | Down |
| ENSOCUG00000017765  | 0.292515383 | -1.773415597 | PPP4R3A  | Down |
| ENSOCUG00000025320  | 0.301444296 | -1.730036663 | -        | Down |
| ENSOCUG00000003985  | 0.266344628 | -1.908633911 | CHMP2B   | Down |
| ENSOCUG00000007468  | 0.263667917 | -1.923206062 | CCPG1    | Down |
| ENSOCUG00000000186  | 0.210866051 | -2.245601254 | -        | Down |
| ENSOCUG00000013639  | 0.16008504  | -2.643089599 | ADGRL2   | Down |
| ENSOCUG00000009516  | 0.008585763 | -6.863837894 | CHRNA6   | Down |
| ENSOCUG00000004218  | 0.27349026  | -1.870438641 | CD14     | Down |
| ENSOCUG00000001540  | 0.121178297 | -3.044796759 | DUSP5    | Down |
| ENSOCUG00000007416  | 0.163121914 | -2.61597749  | QPCT     | Down |
| ENSOCUG00000000730  | 0.379025638 | -1.399632656 | BAIAP2L1 | Down |
| ENSOCUG00000029499  | 0.200587555 | -2.317695997 | CWC27    | Down |
| ENSOCUG00000001316  | 0.227393529 | -2.136736897 | ESRP1    | Down |
| ENSOCUG000000011358 | 0.379096183 | -1.399364164 | CAB39    | Down |
| ENSOCUG00000032815  | 0.324727712 | -1.622697587 | C3orf62  | Down |
| ENSOCUG00000017493  | 0.138869098 | -2.848202498 | KIF5B    | Down |
| ENSOCUG00000014500  | 0.095405525 | -3.389783375 | AHCTF1   | Down |
| ENSOCUG00000003596  | 0.380029907 | -1.395815139 | GDE1     | Down |
| ENSOCUG00000006047  | 0.357601262 | -1.483576268 | MARVELD2 | Down |
| ENSOCUG00000039408  | 0.342790221 | -1.544602143 | -        | Down |



|                     |             |              |          |      |
|---------------------|-------------|--------------|----------|------|
| ENSOCUG00000009461  | 0.211018243 | -2.244560368 | ESYT3    | Down |
| ENSOCUG00000016363  | 0.110372781 | -3.179543657 | BCLAF1   | Down |
| ENSOCUG00000002577  | 0.26474424  | -1.917328799 | LRIF1    | Down |
| ENSOCUG000000027150 | 0           | -Inf         | -        | Down |
| ENSOCUG00000007494  | 0           | -Inf         | RNASE6   | Down |
| ENSOCUG00000016401  | 0.095019197 | -3.395637168 | PHIP     | Down |
| ENSOCUG00000039230  | 0           | -Inf         | -        | Down |
| ENSOCUG00000003486  | 0           | -Inf         | SLC5A8   | Down |
| ENSOCUG00000032647  | 0.36639627  | -1.448523279 | UFM1     | Down |
| ENSOCUG00000006556  | 0.364728341 | -1.455105788 | OGFRL1   | Down |
| ENSOCUG000000029107 | 0.105031624 | -3.25110432  | ND4L     | Down |
| ENSOCUG00000007833  | 0.358661162 | -1.479306564 | DLX3     | Down |
| ENSOCUG000000025092 | 0.086198327 | -3.536196316 | -        | Down |
| ENSOCUG00000001806  | 0.135061704 | -2.888309425 | MOB1B    | Down |
| ENSOCUG00000003795  | 0.093178163 | -3.423864297 | ERBIN    | Down |
| ENSOCUG00000012009  | 0.08358175  | -3.580668217 | MPP5     | Down |
| ENSOCUG00000006566  | 0.091206729 | -3.454715927 | XK       | Down |
| ENSOCUG000000026362 | 0.082576439 | -3.598125991 | -        | Down |
| ENSOCUG00000004404  | 0.247307765 | -2.015620557 | MCTP2    | Down |
| ENSOCUG00000000601  | 0.302063277 | -1.727077295 | -        | Down |
| ENSOCUG00000004930  | 0.266689997 | -1.906764383 | RC3H1    | Down |
| ENSOCUG00000016898  | 0.280090756 | -1.836033727 | PLEKHG1  | Down |
| ENSOCUG00000005996  | 0.116277957 | -3.104350467 | THOC2    | Down |
| ENSOCUG00000012427  | 0.284543933 | -1.813276677 | TMED5    | Down |
| ENSOCUG00000017435  | 0.064905662 | -3.945511863 | RIF1     | Down |
| ENSOCUG00000002977  | 0.297791733 | -1.747624391 | -        | Down |
| ENSOCUG00000005111  | 0.086492032 | -3.531288951 | N4BP2    | Down |
| ENSOCUG00000016453  | 0.380601401 | -1.393647222 | TOR1AIP2 | Down |
| ENSOCUG00000009587  | 0.054661476 | -4.193331782 | ESCO1    | Down |
| ENSOCUG00000014998  | 0.075129307 | -3.734480403 | IL36A    | Down |
| ENSOCUG00000038200  | 0.111177094 | -3.169068511 | -        | Down |
| ENSOCUG00000008680  | 0.072605061 | -3.783786079 | MAP9     | Down |
| ENSOCUG00000012638  | 0.330464329 | -1.597433542 | PSMC6    | Down |
| ENSOCUG00000010248  | 0.094582909 | -3.402276672 | GBA2     | Down |
| ENSOCUG00000000155  | 0.200816891 | -2.316047475 | NSRP1    | Down |
| ENSOCUG00000003170  | 0.248112241 | -2.010935181 | SBDS     | Down |
| ENSOCUG00000007073  | 0.135351009 | -2.885222448 | LARP7    | Down |
| ENSOCUG000000021154 | 0.179486055 | -2.478056333 | EIF5B    | Down |
| ENSOCUG00000003085  | 0.174773505 | -2.516441601 | KCNRG    | Down |
| ENSOCUG00000015371  | 0.390408157 | -1.356944897 | SPINT1   | Down |
| ENSOCUG00000017924  | 0.033808974 | -4.886449949 | MME      | Down |
| ENSOCUG00000025054  | 0.068758552 | -3.862317033 | TREX2    | Down |
| ENSOCUG00000003816  | 0.083979504 | -3.573818917 | HECTD1   | Down |
| ENSOCUG00000014431  | 0.344931577 | -1.535617887 | FAM13B   | Down |

|                     |             |              |          |      |
|---------------------|-------------|--------------|----------|------|
| ENSOCUG00000014773  | 0.173241367 | -2.529144637 | HSPH1    | Down |
| ENSOCUG00000005209  | 0.089441233 | -3.482916111 | -        | Down |
| ENSOCUG00000011147  | 0.312101392 | -1.679913302 | CLCN1    | Down |
| ENSOCUG00000006605  | 0.19007687  | -2.395345109 | ARID4B   | Down |
| ENSOCUG00000008043  | 0.186666182 | -2.421467515 | ERC2     | Down |
| ENSOCUG00000008748  | 0.329349928 | -1.60230686  | NT5DC4   | Down |
| ENSOCUG00000001879  | 0.372128134 | -1.42612863  | SPAG1    | Down |
| ENSOCUG00000010028  | 0.156416001 | -2.676539992 | LIN9     | Down |
| ENSOCUG00000002557  | 0.247154675 | -2.016513897 | CLSTN2   | Down |
| ENSOCUG00000015407  | 0.160780177 | -2.636838555 | GRAMD1C  | Down |
| ENSOCUG00000008834  | 0.164991692 | -2.599534711 | COMMD8   | Down |
| ENSOCUG00000007729  | 0.393477175 | -1.345648146 | -        | Down |
| ENSOCUG00000034289  | 0.389678365 | -1.35964426  | -        | Down |
| ENSOCUG00000006993  | 0.020117031 | -5.635438793 | CPA5     | Down |
| ENSOCUG00000031190  | 0.073092586 | -3.774131108 | -        | Down |
| ENSOCUG00000004968  | 0.124595224 | -3.004679329 | REL      | Down |
| ENSOCUG00000016531  | 0.080189408 | -3.640444495 | -        | Down |
| ENSOCUG00000008363  | 0.237405349 | -2.074575654 | VPS37A   | Down |
| ENSOCUG00000023887  | 0.387823403 | -1.366528231 | -        | Down |
| ENSOCUG00000012516  | 0.186241738 | -2.424751666 | LIN54    | Down |
| ENSOCUG00000007899  | 0.367539035 | -1.444030612 | NSDHL    | Down |
| ENSOCUG00000008191  | 0.13137754  | -2.928209439 | GABRP    | Down |
| ENSOCUG00000004713  | 0.347102    | -1.526568417 | WAC      | Down |
| ENSOCUG00000011242  | 0.38899284  | -1.362184496 | MFSD5    | Down |
| ENSOCUG00000001328  | 0.105539762 | -3.244141466 | VPS13A   | Down |
| ENSOCUG00000015579  | 0.395216568 | -1.339284668 | UAP1     | Down |
| ENSOCUG00000028032  | 0.39720182  | -1.332055861 | TUBA1C   | Down |
| ENSOCUG00000001309  | 0.196894852 | -2.344502702 | ISM1     | Down |
| ENSOCUG00000013733  | 0.21806893  | -2.197143865 | USP53    | Down |
| ENSOCUG00000016393  | 0.098915318 | -3.33766224  | RB1CC1   | Down |
| ENSOCUG00000002984  | 0.2138671   | -2.225213533 | DOCK9    | Down |
| ENSOCUG00000017454  | 0.29297882  | -1.771131723 | NMD3     | Down |
| ENSOCUG00000027324  | 0.364699563 | -1.455219625 | TAF3     | Down |
| ENSOCUG00000012735  | 0.299388488 | -1.739909348 | COQ10B   | Down |
| ENSOCUG00000005026  | 0.08432378  | -3.567916647 | -        | Down |
| ENSOCUG000000021508 | 0.403691654 | -1.308674333 | INAVA    | Down |
| ENSOCUG00000007550  | 0.092004772 | -3.442147493 | MIS18BP1 | Down |
| ENSOCUG00000014569  | 0.24653155  | -2.020155808 | OTUD4    | Down |
| ENSOCUG00000002363  | 0.129137048 | -2.953025147 | CWC22    | Down |
| ENSOCUG00000029308  | 0.396472902 | -1.334705831 | RAB10    | Down |
| ENSOCUG00000014147  | 0.137385352 | -2.863699904 | CHORDC1  | Down |
| ENSOCUG00000002674  | 0           | -Inf         | KCNG3    | Down |
| ENSOCUG00000028097  | 0.33952245  | -1.558421122 | -        | Down |
| ENSOCUG00000015400  | 0.395221502 | -1.339266657 | PTPN14   | Down |

|                     |             |              |          |      |
|---------------------|-------------|--------------|----------|------|
| ENSOCUG00000013300  | 0.110869762 | -3.173062144 | -        | Down |
| ENSOCUG00000005655  | 0.054839883 | -4.188630685 | SMC2     | Down |
| ENSOCUG00000008247  | 0.255792562 | -1.966953779 | -        | Down |
| ENSOCUG00000004412  | 0.364677861 | -1.455305477 | AP1G1    | Down |
| ENSOCUG00000022951  | 0.109887492 | -3.18590092  | -        | Down |
| ENSOCUG00000025674  | 0.203631954 | -2.295964126 | SPTY2D1  | Down |
| ENSOCUG00000008212  | 0.119820953 | -3.061047883 | DNTTIP2  | Down |
| ENSOCUG000000023957 | 0.049319461 | -4.34169916  | -        | Down |
| ENSOCUG00000012358  | 0.138876021 | -2.848130575 | ATP11B   | Down |
| ENSOCUG00000015669  | 0.101467738 | -3.300906999 | ARAP2    | Down |
| ENSOCUG00000003026  | 0.292473165 | -1.773623833 | DHX15    | Down |
| ENSOCUG00000003843  | 0.238749822 | -2.066428436 | DDX10    | Down |
| ENSOCUG00000012730  | 0.124782957 | -3.002507187 | TAX1BP1  | Down |
| ENSOCUG00000014647  | 0.100528724 | -3.31432031  | USP15    | Down |
| ENSOCUG00000003686  | 0.259511872 | -1.946127554 | USP8     | Down |
| ENSOCUG00000004403  | 0.134946475 | -2.889540806 | -        | Down |
| ENSOCUG00000015368  | 0.410815252 | -1.283438351 | FAM83A   | Down |
| ENSOCUG00000017716  | 0.171045983 | -2.547543873 | CPS1     | Down |
| ENSOCUG00000013150  | 0.405441973 | -1.302432645 | DSP      | Down |
| ENSOCUG00000005226  | 0.345086033 | -1.53497201  | ZNF143   | Down |
| ENSOCUG00000008071  | 0.410224888 | -1.285513074 | -        | Down |
| ENSOCUG00000004848  | 0.107834234 | -3.213112829 | ROCK1    | Down |
| ENSOCUG00000014069  | 0.103827307 | -3.267742172 | ZNF507   | Down |
| ENSOCUG00000001751  | 0.367051384 | -1.445946054 | RND3     | Down |
| ENSOCUG00000002098  | 0.400271463 | -1.320949331 | FCHSD1   | Down |
| ENSOCUG00000008962  | 0.355503674 | -1.492063627 | LNPK     | Down |
| ENSOCUG00000011423  | 0.122274454 | -3.031805077 | LMBRD2   | Down |
| ENSOCUG00000008720  | 0.193060685 | -2.372873691 | SEC62    | Down |
| ENSOCUG00000006220  | 0.205728001 | -2.281189924 | CLCN3    | Down |
| ENSOCUG00000000107  | 0.397028452 | -1.332685698 | MPPE1    | Down |
| ENSOCUG00000016427  | 0.162193279 | -2.624214056 | TRIM33   | Down |
| ENSOCUG00000009784  | 0.124280276 | -3.00833075  | FOXN2    | Down |
| ENSOCUG00000010614  | 0.081837766 | -3.611089428 | -        | Down |
| ENSOCUG00000003064  | 0.233378295 | -2.099257701 | NUP153   | Down |
| ENSOCUG00000004446  | 0.400188983 | -1.321246643 | VPS37B   | Down |
| ENSOCUG00000000174  | 0.206883433 | -2.273109975 | EXOC6    | Down |
| ENSOCUG00000000218  | 0.161965277 | -2.626243541 | OTUD6B   | Down |
| ENSOCUG00000001798  | 0.152145351 | -2.716477845 | ACAP2    | Down |
| ENSOCUG00000014398  | 0.40271878  | -1.312155343 | RAP2B    | Down |
| ENSOCUG00000006230  | 0.119156301 | -3.06907285  | UPF2     | Down |
| ENSOCUG000000038504 | 0.16972761  | -2.558706825 | C1orf210 | Down |
| ENSOCUG00000009041  | 0.186568261 | -2.422224519 | BOD1L1   | Down |
| ENSOCUG00000011903  | 0.210710564 | -2.246665449 | ZC3H15   | Down |
| ENSOCUG00000017272  | 0.101237    | -3.304191433 | COBLL1   | Down |

|                     |             |              |          |      |
|---------------------|-------------|--------------|----------|------|
| ENSOCUG00000012546  | 0.40127674  | -1.317330477 | ZNF462   | Down |
| ENSOCUG00000029164  | 0.287854471 | -1.796588475 | -        | Down |
| ENSOCUG00000011084  | 0.185006822 | -2.434349627 | PPIG     | Down |
| ENSOCUG00000003943  | 0.395356089 | -1.338775452 | CLCF1    | Down |
| ENSOCUG00000010663  | 0.07575205  | -3.722571253 | MAPK10   | Down |
| ENSOCUG00000017567  | 0.397309708 | -1.331664049 | -        | Down |
| ENSOCUG00000006049  | 0.308864627 | -1.694953442 | VCPKMT   | Down |
| ENSOCUG00000003125  | 0.08655567  | -3.530227862 | TRPM7    | Down |
| ENSOCUG00000015953  | 0.18486989  | -2.435417827 | STK17A   | Down |
| ENSOCUG00000014034  | 0.334191997 | -1.581250912 | C3orf38  | Down |
| ENSOCUG00000008428  | 0.06935911  | -3.849770806 | -        | Down |
| ENSOCUG00000013799  | 0.133152527 | -2.908848287 | UACA     | Down |
| ENSOCUG00000011514  | 0.151372607 | -2.723823939 | MFAP3L   | Down |
| ENSOCUG00000016769  | 0.347910289 | -1.523212748 | RIPOR3   | Down |
| ENSOCUG00000002693  | 0           | -Inf         | CATSPERB | Down |
| ENSOCUG00000023926  | 0.149619297 | -2.740631841 | ZNF711   | Down |
| ENSOCUG00000005597  | 0.354037046 | -1.498027765 | FMN1     | Down |
| ENSOCUG00000006180  | 0.39923955  | -1.324673449 | LPCAT4   | Down |
| ENSOCUG00000007324  | 0.22410461  | -2.157755769 | ADGRG2   | Down |
| ENSOCUG00000001742  | 0.093919417 | -3.412432742 | CASP8AP2 | Down |
| ENSOCUG00000000617  | 0.386381063 | -1.371903707 | UTP15    | Down |
| ENSOCUG00000036679  | 0.016304065 | -5.938624491 | -        | Down |
| ENSOCUG000000026148 | 0.07455514  | -3.745548372 | -        | Down |
| ENSOCUG00000017331  | 0.118865957 | -3.07259251  | NAA15    | Down |
| ENSOCUG000000038349 | 0.09721326  | -3.362703083 | -        | Down |
| ENSOCUG00000001219  | 0.14398508  | -2.796008768 | RASA2    | Down |
| ENSOCUG00000005712  | 0.282400561 | -1.824185143 | -        | Down |
| ENSOCUG00000000918  | 0.180768399 | -2.4677856   | TLX3     | Down |
| ENSOCUG00000001821  | 0.148987841 | -2.7467335   | -        | Down |
| ENSOCUG00000014221  | 0.401209141 | -1.317573617 | -        | Down |
| ENSOCUG00000011764  | 0.348767758 | -1.519661421 | LPP      | Down |
| ENSOCUG00000015748  | 0.410232424 | -1.285486569 | NPEPPS   | Down |
| ENSOCUG00000017819  | 0.155758787 | -2.682614544 | USP34    | Down |
| ENSOCUG00000010712  | 0.319900098 | -1.64430666  | MFAP1    | Down |
| ENSOCUG00000030530  | 0.228165654 | -2.131846456 | -        | Down |
| ENSOCUG00000000144  | 0.086621305 | -3.529134277 | -        | Down |
| ENSOCUG00000008982  | 0.116699233 | -3.099133017 | BLZF1    | Down |
| ENSOCUG00000007823  | 0.163099896 | -2.61617223  | SGPP2    | Down |
| ENSOCUG00000005376  | 0.394694494 | -1.341191703 | EIF3J    | Down |
| ENSOCUG00000001076  | 0.184476117 | -2.438494046 | SOCS6    | Down |
| ENSOCUG00000029102  | 0.117194848 | -3.093018944 | ATP6     | Down |
| ENSOCUG00000005880  | 0.132848889 | -2.912141928 | PDS5A    | Down |
| ENSOCUG00000017858  | 0.37472085  | -1.416111841 | -        | Down |
| ENSOCUG00000010714  | 0.166522754 | -2.58620877  | SENP6    | Down |

|                     |             |              |          |      |
|---------------------|-------------|--------------|----------|------|
| ENSOCUG00000001300  | 0.357427749 | -1.484276452 | CCSER1   | Down |
| ENSOCUG00000002784  | 0.388739861 | -1.363123045 | GTF2E1   | Down |
| ENSOCUG000000010396 | 0.176230156 | -2.504467281 | SSB      | Down |
| ENSOCUG000000001834 | 0.353235006 | -1.501299773 | ODF2L    | Down |
| ENSOCUG000000026795 | 0.399913396 | -1.322240488 | -        | Down |
| ENSOCUG000000015094 | 0.210984764 | -2.244789274 | -        | Down |
| ENSOCUG000000004346 | 0.325507953 | -1.619235302 | RBBP6    | Down |
| ENSOCUG000000014821 | 0.398648238 | -1.326811801 | CSNK1G3  | Down |
| ENSOCUG000000027050 | 0.246691739 | -2.019218688 | LYPD3    | Down |
| ENSOCUG000000016521 | 0.32991902  | -1.599816142 | RRAGC    | Down |
| ENSOCUG000000003134 | 0.151223346 | -2.725247209 | MIER3    | Down |
| ENSOCUG000000000924 | 0.381690803 | -1.389523669 | PIGW     | Down |
| ENSOCUG000000015484 | 0.382559841 | -1.386242658 | CRNKL1   | Down |
| ENSOCUG000000012261 | 0.183433902 | -2.446667793 | TPR      | Down |
| ENSOCUG000000001418 | 0.405913167 | -1.300756956 | PSMD14   | Down |
| ENSOCUG000000002083 | 0.344730162 | -1.536460564 | TMC7     | Down |
| ENSOCUG000000016474 | 0.215056013 | -2.217215627 | KIAA2026 | Down |
| ENSOCUG000000004852 | 0.277526307 | -1.849303565 | MALL     | Down |
| ENSOCUG000000009266 | 0.112359223 | -3.153809539 | CAND2    | Down |
| ENSOCUG000000016919 | 0.149616618 | -2.740657672 | CEP83    | Down |
| ENSOCUG000000024369 | 0.370404885 | -1.43282497  | -        | Down |
| ENSOCUG000000001082 | 0.413795463 | -1.273010267 | CLIP4    | Down |
| ENSOCUG000000017086 | 0.23614894  | -2.082231035 | ZMYM2    | Down |
| ENSOCUG000000015413 | 0.283073685 | -1.820750456 | PDCD10   | Down |
| ENSOCUG000000008605 | 0.414607118 | -1.270183209 | PTPN1    | Down |
| ENSOCUG000000001957 | 0.338127583 | -1.564360386 | -        | Down |
| ENSOCUG000000015510 | 0.412979838 | -1.275856747 | C2CD2    | Down |
| ENSOCUG000000024909 | 0.223639919 | -2.160750367 | -        | Down |
| ENSOCUG000000017406 | 0.146089554 | -2.775075073 | -        | Down |
| ENSOCUG000000029583 | 0.226370522 | -2.143241995 | -        | Down |
| ENSOCUG000000004691 | 0.429649329 | -1.218768453 | PROM2    | Down |
| ENSOCUG000000000593 | 0.401375304 | -1.316976241 | ZFYVE26  | Down |
| ENSOCUG000000005465 | 0.394388041 | -1.342312289 | NOCT     | Down |
| ENSOCUG000000021310 | 0.239928041 | -2.059326318 | -        | Down |
| ENSOCUG000000015651 | 0.408151742 | -1.292822481 | ATG3     | Down |
| ENSOCUG000000012200 | 0.223268081 | -2.163151079 | RAB5A    | Down |
| ENSOCUG000000030742 | 0.41645801  | -1.263757053 | PAFAH1B1 | Down |
| ENSOCUG000000006685 | 0.200049058 | -2.321574257 | GABPA    | Down |
| ENSOCUG000000017800 | 0.411750819 | -1.280156575 | -        | Down |
| ENSOCUG000000012712 | 0.134966807 | -2.889323447 | EPC2     | Down |
| ENSOCUG000000002780 | 0.379534744 | -1.397696135 | PANK1    | Down |
| ENSOCUG000000012136 | 0.125360873 | -2.995840965 | TBK1     | Down |
| ENSOCUG000000013721 | 0.398136559 | -1.32866474  | CRY1     | Down |
| ENSOCUG000000000425 | 0.234082395 | -2.094911657 | PRPF4B   | Down |

|                     |             |              |         |      |
|---------------------|-------------|--------------|---------|------|
| ENSOCUG00000009451  | 0.194612338 | -2.36132492  | PIK3C3  | Down |
| ENSOCUG00000014123  | 0.385005052 | -1.377050717 | PPP1R2  | Down |
| ENSOCUG00000029025  | 0.40929008  | -1.288804396 | CSTA    | Down |
| ENSOCUG00000027940  | 0.129592198 | -2.947949232 | HSPA4L  | Down |
| ENSOCUG00000011524  | 0.270381551 | -1.886931381 | USP38   | Down |
| ENSOCUG00000000083  | 0.166665784 | -2.58497014  | HTRA4   | Down |
| ENSOCUG00000016464  | 0.186323003 | -2.424122301 | -       | Down |
| ENSOCUG000000029101 | 0.108286743 | -3.207071462 | ATP8    | Down |
| ENSOCUG00000004646  | 0.195493084 | -2.354810522 | RASA1   | Down |
| ENSOCUG00000025362  | 0.261836834 | -1.933260032 | RND1    | Down |
| ENSOCUG00000024444  | 0.369236328 | -1.437383593 | CRHR2   | Down |
| ENSOCUG00000016503  | 0.238735057 | -2.066517661 | WAPL    | Down |
| ENSOCUG00000030482  | 0.376413884 | -1.409608254 | -       | Down |
| ENSOCUG00000016181  | 0.111588323 | -3.163742034 | -       | Down |
| ENSOCUG00000004434  | 0.124658476 | -3.00394712  | CHD1    | Down |
| ENSOCUG00000022150  | 0.054807211 | -4.189490477 | -       | Down |
| ENSOCUG00000004454  | 0.16024617  | -2.641638218 | DHX29   | Down |
| ENSOCUG00000032317  | 0           | -Inf         | -       | Down |
| ENSOCUG00000005642  | 0.235158262 | -2.088296072 | MTPN    | Down |
| ENSOCUG00000012972  | 0.410539161 | -1.28440825  | CRYAB   | Down |
| ENSOCUG00000016074  | 0.364334047 | -1.456666272 | TSC22D2 | Down |
| ENSOCUG00000013765  | 0.422759058 | -1.242092427 | SNX9    | Down |
| ENSOCUG00000006455  | 0.133622876 | -2.90376108  | COPS2   | Down |
| ENSOCUG00000030393  | 0.295000675 | -1.76120984  | -       | Down |
| ENSOCUG00000008165  | 0.418529813 | -1.256597702 | MTFR1   | Down |
| ENSOCUG00000032273  | 0.420407398 | -1.250140038 | RAP1B   | Down |
| ENSOCUG00000009069  | 0.419947984 | -1.251717451 | UBAP1   | Down |
| ENSOCUG00000007193  | 0.21731179  | -2.202161648 | AP4E1   | Down |
| ENSOCUG00000029113  | 0.416767922 | -1.262683855 | ND6     | Down |
| ENSOCUG00000005896  | 0.132415553 | -2.916855507 | INPP4B  | Down |
| ENSOCUG00000010777  | 0.167424236 | -2.578419707 | DOP1A   | Down |
| ENSOCUG00000000756  | 0.139884791 | -2.837688982 | -       | Down |
| ENSOCUG00000003516  | 0.298617333 | -1.743630188 | -       | Down |
| ENSOCUG00000000806  | 0.098124598 | -3.349241351 | TTC14   | Down |
| ENSOCUG00000027653  | 0.059936538 | -4.060420427 | -       | Down |
| ENSOCUG00000002468  | 0.05429519  | -4.203031797 | KIF20B  | Down |
| ENSOCUG00000011272  | 0.405329889 | -1.30283153  | ARIH1   | Down |
| ENSOCUG00000008812  | 0.045550069 | -4.456402937 | POF1B   | Down |
| ENSOCUG00000027691  | 0.16160403  | -2.629464918 | -       | Down |
| ENSOCUG00000029108  | 0.147268771 | -2.763476561 | ND4     | Down |
| ENSOCUG00000029143  | 0.139815987 | -2.838398767 | -       | Down |
| ENSOCUG00000029099  | 0.143936957 | -2.796491028 | COX2    | Down |
| ENSOCUG00000006420  | 0.411391148 | -1.281417344 | SMCR8   | Down |
| ENSOCUG00000001857  | 0.380130435 | -1.395433557 | ZBTB10  | Down |

|                     |             |              |         |      |
|---------------------|-------------|--------------|---------|------|
| ENSOCUG00000017815  | 0.130916758 | -2.933278316 | CWH43   | Down |
| ENSOCUG00000011638  | 0.415333032 | -1.267659478 | RBM6    | Down |
| ENSOCUG00000003976  | 0.409077816 | -1.289552793 | GOLGA1  | Down |
| ENSOCUG00000004886  | 0.418785562 | -1.25571639  | AKIRIN2 | Down |
| ENSOCUG00000006498  | 0.042358381 | -4.561208756 | -       | Down |
| ENSOCUG00000024540  | 0.433382341 | -1.206287726 | -       | Down |
| ENSOCUG00000001804  | 0.264305054 | -1.919724084 | RPAP2   | Down |
| ENSOCUG000000017670 | 0.161350184 | -2.631732869 | PTBP3   | Down |
| ENSOCUG00000005742  | 0.349434942 | -1.516904218 | KCTD14  | Down |
| ENSOCUG00000012549  | 0.418670701 | -1.256112134 | MEX3C   | Down |
| ENSOCUG00000000392  | 0.364825953 | -1.454719731 | ARMC1   | Down |
| ENSOCUG00000013277  | 0.140623115 | -2.830094339 | CCAR1   | Down |
| ENSOCUG000000017263 | 0.144474657 | -2.791111651 | RLF     | Down |
| ENSOCUG000000010527 | 0.180884104 | -2.466862466 | OSBPL8  | Down |
| ENSOCUG00000012031  | 0.426124106 | -1.230654428 | PLEK2   | Down |
| ENSOCUG000000016120 | 0.331905363 | -1.591156152 | -       | Down |
| ENSOCUG000000014750 | 0.410387385 | -1.284941711 | TENT4B  | Down |
| ENSOCUG000000034911 | 0.326799153 | -1.613523849 | -       | Down |
| ENSOCUG000000033788 | 0.417300935 | -1.260839941 | -       | Down |
| ENSOCUG000000021080 | 0.418161191 | -1.25786892  | MBD2    | Down |
| ENSOCUG000000029115 | 0.143531041 | -2.800565313 | CYTB    | Down |
| ENSOCUG000000016688 | 0.135210518 | -2.886720711 | MTM1    | Down |
| ENSOCUG000000013429 | 0.401697906 | -1.315817154 | NHSL1   | Down |
| ENSOCUG000000016003 | 0.297167979 | -1.750649427 | KCNK1   | Down |
| ENSOCUG000000000127 | 0.258105932 | -1.953964794 | -       | Down |
| ENSOCUG000000015028 | 0.075826863 | -3.721147155 | SLC6A14 | Down |
| ENSOCUG000000024835 | 0.357377228 | -1.484480386 | ALG11   | Down |
| ENSOCUG000000016958 | 0.292160912 | -1.775164921 | PCMTD1  | Down |
| ENSOCUG000000000334 | 0.392525153 | -1.34914299  | TOX4    | Down |
| ENSOCUG000000009618 | 0.388525421 | -1.3639191   | SLAIN2  | Down |
| ENSOCUG000000001165 | 0.093367518 | -3.420935463 | -       | Down |
| ENSOCUG000000009433 | 0.273242184 | -1.871747867 | LPIN2   | Down |
| ENSOCUG000000010182 | 0.273576533 | -1.86998361  | MLH3    | Down |
| ENSOCUG000000004276 | 0.39984248  | -1.322496341 | MTERF3  | Down |
| ENSOCUG000000000547 | 0.09263514  | -3.432296623 | -       | Down |
| ENSOCUG000000013209 | 0.261764801 | -1.933656979 | PTPRZ1  | Down |
| ENSOCUG000000011978 | 0.083475239 | -3.58250787  | FAM124B | Down |
| ENSOCUG000000012511 | 0.135701536 | -2.881491048 | PMS1    | Down |
| ENSOCUG000000012582 | 0.414717912 | -1.269797737 | RAB21   | Down |
| ENSOCUG000000009484 | 0.072019677 | -3.795465054 | ECT2    | Down |
| ENSOCUG000000002839 | 0.217319568 | -2.202110011 | -       | Down |
| ENSOCUG000000003294 | 0.310878885 | -1.685575464 | WDR26   | Down |
| ENSOCUG000000031226 | 0.406135554 | -1.299966765 | -       | Down |
| ENSOCUG000000004184 | 0.427813404 | -1.22494641  | SLC39A8 | Down |

|                    |             |              |          |      |
|--------------------|-------------|--------------|----------|------|
| ENSOCUG00000022299 | 0.06948348  | -3.847186174 | PI15     | Down |
| ENSOCUG00000008154 | 0.206257903 | -2.277478697 | TMF1     | Down |
| ENSOCUG00000003338 | 0.418296819 | -1.257401069 | RNF111   | Down |
| ENSOCUG00000000876 | 0.217773846 | -2.199097396 | INTS6    | Down |
| ENSOCUG00000003201 | 0.428201888 | -1.223636937 | BCL2L1   | Down |
| ENSOCUG00000010932 | 0.20349242  | -2.29695304  | GPBP1    | Down |
| ENSOCUG00000009173 | 0.159241905 | -2.650708062 | RBM34    | Down |
| ENSOCUG00000004957 | 0.146208579 | -2.773900126 | GALNT3   | Down |
| ENSOCUG00000000038 | 0.093466226 | -3.419411054 | CREBRF   | Down |
| ENSOCUG00000034094 | 0.321010619 | -1.639307074 | EIF4EBP3 | Down |
| ENSOCUG00000012531 | 0.253116218 | -1.982128147 | NEU3     | Down |
| ENSOCUG00000008053 | 0.176965091 | -2.498463298 | NOL8     | Down |
| ENSOCUG00000006467 | 0.407029374 | -1.296795181 | NAA50    | Down |
| ENSOCUG00000004653 | 0.222830385 | -2.165982122 | METAP2   | Down |
| ENSOCUG00000012593 | 0.156575059 | -2.675073673 | BAZ1A    | Down |
| ENSOCUG00000024612 | 0.42524135  | -1.233646205 | FAM102A  | Down |
| ENSOCUG00000017116 | 0           | -Inf         | -        | Down |
| ENSOCUG00000039573 | 0.065080763 | -3.941625032 | GJB7     | Down |
| ENSOCUG00000015836 | 0.393038934 | -1.347255862 | MPZL2    | Down |
| ENSOCUG00000021847 | 0.136651355 | -2.871428335 | -        | Down |
| ENSOCUG00000012292 | 0.222508668 | -2.168066557 | CASD1    | Down |
| ENSOCUG00000003437 | 0           | -Inf         | -        | Down |
| ENSOCUG00000010650 | 0.148393534 | -2.752499865 | KTNI     | Down |
| ENSOCUG00000022047 | 0.154127865 | -2.697800383 | -        | Down |
| ENSOCUG00000014223 | 0.437949961 | -1.191162055 | UVRAG    | Down |
| ENSOCUG00000011923 | 0.304115495 | -1.71730877  | RSF1     | Down |
| ENSOCUG00000025190 | 0.144874226 | -2.787127145 | LRRC58   | Down |
| ENSOCUG00000008998 | 0.291484181 | -1.778510505 | KCNJ14   | Down |
| ENSOCUG00000003095 | 0.088367893 | -3.500333906 | CIP2A    | Down |
| ENSOCUG00000033301 | 0.306962107 | -1.70386752  | -        | Down |
| ENSOCUG00000024670 | 0.165819499 | -2.592314432 | ZNF770   | Down |
| ENSOCUG00000039314 | 0.314767717 | -1.667640512 | -        | Down |
| ENSOCUG00000002099 | 0.415171486 | -1.268220731 | MADD     | Down |
| ENSOCUG00000001698 | 0.355627668 | -1.491560524 | MAP3K7   | Down |
| ENSOCUG00000032320 | 0.412644051 | -1.277030252 | -        | Down |
| ENSOCUG00000016381 | 0.194804789 | -2.359898953 | BROX     | Down |
| ENSOCUG00000013287 | 0.204864304 | -2.28725947  | -        | Down |
| ENSOCUG00000005077 | 0.241463038 | -2.05012573  | TOPORS   | Down |
| ENSOCUG00000005701 | 0.377136988 | -1.406839442 | -        | Down |
| ENSOCUG00000000819 | 0.31666338  | -1.658978058 | ABHD17B  | Down |
| ENSOCUG00000010076 | 0.425599892 | -1.23243031  | ABI1     | Down |
| ENSOCUG00000001180 | 0.119627673 | -3.063376932 | DHX36    | Down |
| ENSOCUG00000011167 | 0.088262534 | -3.502055026 | -        | Down |
| ENSOCUG00000011712 | 0.446307179 | -1.163891081 | AFAP1L2  | Down |



|                     |             |              |          |      |
|---------------------|-------------|--------------|----------|------|
| ENSOCUG00000011142  | 0.163585629 | -2.611882083 | SMC3     | Down |
| ENSOCUG00000015417  | 0.387796298 | -1.366629064 | CSTF3    | Down |
| ENSOCUG00000009401  | 0.38437212  | -1.379424401 | -        | Down |
| ENSOCUG00000014007  | 0.180130411 | -2.472886326 | HEATR1   | Down |
| ENSOCUG00000001420  | 0.401994205 | -1.314753391 | SYNJ1    | Down |
| ENSOCUG000000021705 | 0.415054813 | -1.268626221 | -        | Down |
| ENSOCUG000000029290 | 0.199554162 | -2.325147726 | -        | Down |
| ENSOCUG000000007579 | 0.133919262 | -2.900564614 | ATRX     | Down |
| ENSOCUG000000006390 | 0.276689571 | -1.853659827 | AFTPH    | Down |
| ENSOCUG00000012366  | 0.286134543 | -1.80523442  | SLC25A46 | Down |
| ENSOCUG000000004742 | 0.178027882 | -2.489824885 | USP25    | Down |
| ENSOCUG00000012189  | 0.155570463 | -2.684359927 | MAPK6    | Down |
| ENSOCUG00000012819  | 0.153209079 | -2.706426302 | CHM      | Down |
| ENSOCUG000000000543 | 0.306950212 | -1.703923427 | RNF144B  | Down |
| ENSOCUG00000015134  | 0.369943701 | -1.434622362 | ARMC8    | Down |
| ENSOCUG00000016667  | 0.24843274  | -2.009072779 | LATS1    | Down |
| ENSOCUG00000015620  | 0.161864259 | -2.627143632 | APC      | Down |
| ENSOCUG000000025456 | 0.440183189 | -1.183824047 | MAP7     | Down |
| ENSOCUG000000007873 | 0.414224081 | -1.271516668 | IKBKG    | Down |
| ENSOCUG00000016701  | 0.205345688 | -2.283873444 | PPP1R12A | Down |
| ENSOCUG00000013051  | 0.445505603 | -1.166484518 | -        | Down |
| ENSOCUG00000012814  | 0.296402791 | -1.754369062 | RO60     | Down |
| ENSOCUG000000025603 | 0.180359026 | -2.471056468 | GPA33    | Down |
| ENSOCUG00000015961  | 0.432437368 | -1.2094369   | -        | Down |
| ENSOCUG000000005541 | 0.119956758 | -3.059413655 | PIK3C2A  | Down |
| ENSOCUG00000014093  | 0.042737607 | -4.548350047 | GNRH1    | Down |
| ENSOCUG00000001390  | 0.234542874 | -2.092076423 | GOLGA4   | Down |
| ENSOCUG00000001788  | 0.103964533 | -3.265836649 | RASGRP1  | Down |
| ENSOCUG000000007858 | 0.413586207 | -1.273740022 | -        | Down |
| ENSOCUG00000000117  | 0.103927785 | -3.266346692 | TM4SF20  | Down |
| ENSOCUG000000008221 | 0.210561107 | -2.247689114 | TOP1     | Down |
| ENSOCUG00000012547  | 0.173831206 | -2.524240995 | USP54    | Down |
| ENSOCUG000000002827 | 0.264322876 | -1.919626804 | IDE      | Down |
| ENSOCUG000000004290 | 0.227307041 | -2.137285721 | CEP290   | Down |
| ENSOCUG000000006536 | 0.398662937 | -1.326758606 | -        | Down |
| ENSOCUG000000001513 | 0.216131358 | -2.210019693 | VPS26A   | Down |
| ENSOCUG000000003771 | 0.19626419  | -2.349131133 | STAM     | Down |
| ENSOCUG000000006880 | 0.194969188 | -2.358681951 | PPP4R3B  | Down |
| ENSOCUG00000017134  | 0.353816085 | -1.498928458 | SMAP1    | Down |
| ENSOCUG000000008239 | 0.248598077 | -2.00811296  | CAB39L   | Down |
| ENSOCUG000000008195 | 0.337383754 | -1.567537591 | ZNF207   | Down |
| ENSOCUG000000037295 | 0.075806725 | -3.721530349 | -        | Down |
| ENSOCUG000000003155 | 0.415476992 | -1.267159509 | PLAU     | Down |
| ENSOCUG00000017824  | 0.397637602 | -1.330473905 | CCDC59   | Down |

|                     |             |              |          |      |
|---------------------|-------------|--------------|----------|------|
| ENSOCUG00000003631  | 0.213546472 | -2.227378034 | NOP58    | Down |
| ENSOCUG00000006933  | 0.29724318  | -1.750284385 | -        | Down |
| ENSOCUG00000000925  | 0.307665683 | -1.70056456  | GGNBP2   | Down |
| ENSOCUG00000027756  | 0.355001524 | -1.494102877 | -        | Down |
| ENSOCUG00000001319  | 0.271430345 | -1.881346077 | SREK1    | Down |
| ENSOCUG00000017852  | 0.249851947 | -2.000854632 | AQP3     | Down |
| ENSOCUG00000005947  | 0.065240054 | -3.938098207 | SCEL     | Down |
| ENSOCUG00000007241  | 0.443636247 | -1.172550849 | IPPK     | Down |
| ENSOCUG00000029569  | 0.442686179 | -1.175643763 | KRT17    | Down |
| ENSOCUG00000016584  | 0.401273097 | -1.317343661 | PLEKHA5  | Down |
| ENSOCUG00000017654  | 0.19890494  | -2.329848985 | KATNBL1  | Down |
| ENSOCUG00000004479  | 0.361830256 | -1.466615044 | SLC38A9  | Down |
| ENSOCUG000000004040 | 0.418073753 | -1.258170621 | UTP25    | Down |
| ENSOCUG00000027088  | 0.270606527 | -1.885731459 | PPP2R2A  | Down |
| ENSOCUG00000002505  | 0.429326273 | -1.219853633 | TXNL1    | Down |
| ENSOCUG00000017283  | 0.12321796  | -3.020715542 | SMARCAD1 | Down |
| ENSOCUG00000015438  | 0.165413099 | -2.595854606 | MIER1    | Down |
| ENSOCUG00000014442  | 0.093935976 | -3.412178396 | H1-4     | Down |
| ENSOCUG00000006944  | 0.130647996 | -2.936243098 | SPOPL    | Down |
| ENSOCUG00000000706  | 0.393652141 | -1.345006771 | FHOD3    | Down |
| ENSOCUG00000011691  | 0.176242243 | -2.504368337 | STK17B   | Down |
| ENSOCUG00000007821  | 0.43997091  | -1.184519956 | AVPI1    | Down |
| ENSOCUG000000026872 | 0.154960447 | -2.690028071 | -        | Down |
| ENSOCUG000000004950 | 0.41003308  | -1.286187789 | -        | Down |
| ENSOCUG00000013399  | 0           | -Inf         | -        | Down |
| ENSOCUG00000015493  | 0.271055482 | -1.883339907 | ANXA1    | Down |
| ENSOCUG00000015656  | 0.264877865 | -1.916600809 | -        | Down |
| ENSOCUG00000015410  | 0.095872571 | -3.382738064 | NDC80    | Down |
| ENSOCUG00000001672  | 0.131967378 | -2.921746752 | -        | Down |
| ENSOCUG00000003950  | 0.430339174 | -1.216453918 | EPG5     | Down |
| ENSOCUG000000036082 | 0.268738317 | -1.895726056 | -        | Down |
| ENSOCUG00000021196  | 0.206006463 | -2.279238498 | EPB41L3  | Down |
| ENSOCUG00000000916  | 0.330045861 | -1.599261591 | PIP4K2C  | Down |
| ENSOCUG00000022792  | 0.236302773 | -2.081291538 | -        | Down |
| ENSOCUG00000017508  | 0.432088714 | -1.210600545 | ZNF622   | Down |
| ENSOCUG000000003327 | 0.194874701 | -2.359381286 | SLTM     | Down |
| ENSOCUG00000017919  | 0.122556868 | -3.028476759 | CEP135   | Down |
| ENSOCUG000000004189 | 0.32323077  | -1.629363554 | -        | Down |
| ENSOCUG000000009409 | 0.436149845 | -1.197104219 | TRAPPC13 | Down |
| ENSOCUG000000003855 | 0.43459675  | -1.202250708 | -        | Down |
| ENSOCUG000000031910 | 0.384253475 | -1.379869787 | SREK1IP1 | Down |
| ENSOCUG00000016469  | 0.180331387 | -2.471277574 | MLANA    | Down |
| ENSOCUG000000004463 | 0.181968632 | -2.45823832  | MTREX    | Down |
| ENSOCUG00000015730  | 0.170310063 | -2.553764411 | TAOK1    | Down |

|                    |             |              |          |      |
|--------------------|-------------|--------------|----------|------|
| ENSOCUG00000003770 | 0.426538873 | -1.229250865 | MED6     | Down |
| ENSOCUG00000029263 | 0.129303288 | -2.951169138 | RARRES1  | Down |
| ENSOCUG00000013606 | 0.158351811 | -2.65879473  | JAKMIP2  | Down |
| ENSOCUG00000000656 | 0.317014614 | -1.657378746 | SLC39A2  | Down |
| ENSOCUG00000027628 | 0.282026984 | -1.826094888 | ARL14EP  | Down |
| ENSOCUG00000027203 | 0           | -Inf         | AZGP1    | Down |
| ENSOCUG00000007930 | 0.428422925 | -1.222892415 | ATF6     | Down |
| ENSOCUG00000015771 | 0.337009374 | -1.569139372 | SQLE     | Down |
| ENSOCUG00000023173 | 0.369744886 | -1.435397901 | LIPT1    | Down |
| ENSOCUG00000014733 | 0.043895558 | -4.509781252 | -        | Down |
| ENSOCUG00000001112 | 0.07512448  | -3.734573088 | PCM1     | Down |
| ENSOCUG00000034571 | 0.098257368 | -3.347290589 | -        | Down |
| ENSOCUG00000021775 | 0.05174651  | -4.272394616 | MMP10    | Down |
| ENSOCUG00000007109 | 0.399116919 | -1.325116657 | DIAPH2   | Down |
| ENSOCUG00000008250 | 0.442153114 | -1.177382044 | SAR1B    | Down |
| ENSOCUG00000001052 | 0.270967969 | -1.883805775 | ARID4A   | Down |
| ENSOCUG00000012752 | 0.355225042 | -1.493194804 | SIRPB2   | Down |
| ENSOCUG00000007535 | 0.428202417 | -1.223635155 | -        | Down |
| ENSOCUG00000011635 | 0.439600094 | -1.1857364   | ACAD9    | Down |
| ENSOCUG00000016726 | 0.277505319 | -1.849412673 | TRIP12   | Down |
| ENSOCUG00000010435 | 0.229825098 | -2.121391737 | SUSD1    | Down |
| ENSOCUG00000013023 | 0.316240336 | -1.660906701 | -        | Down |
| ENSOCUG00000014452 | 0.264597332 | -1.918129582 | SERPINB2 | Down |
| ENSOCUG00000025998 | 0.100421209 | -3.315864099 | ANKRD12  | Down |
| ENSOCUG00000024804 | 0.421133585 | -1.247650162 | BTBD19   | Down |
| ENSOCUG00000013811 | 0.429718392 | -1.218536568 | SCYL3    | Down |
| ENSOCUG00000000717 | 0.158811781 | -2.65461016  | TOP2B    | Down |
| ENSOCUG00000007836 | 0.207598219 | -2.268134028 | TAB3     | Down |
| ENSOCUG00000003325 | 0.312835348 | -1.676524562 | SOWAHC   | Down |
| ENSOCUG00000013306 | 0.412907895 | -1.276108091 | ARID2    | Down |
| ENSOCUG00000015213 | 0.173055077 | -2.530696824 | -        | Down |
| ENSOCUG00000029356 | 0.181733015 | -2.460107561 | MYSM1    | Down |
| ENSOCUG00000015565 | 0.118200234 | -3.080695202 | KCNJ5    | Down |
| ENSOCUG00000014348 | 0.157781842 | -2.663996914 | SHOC2    | Down |
| ENSOCUG00000010433 | 0.205174455 | -2.285076976 | BTAF1    | Down |
| ENSOCUG00000005756 | 0.388448535 | -1.364204625 | TMEM41B  | Down |
| ENSOCUG00000004826 | 0.242184305 | -2.045822724 | SLC40A1  | Down |
| ENSOCUG00000001717 | 0.215398534 | -2.214919663 | SKAP1    | Down |
| ENSOCUG00000002497 | 0.168621488 | -2.568139699 | CNOT6L   | Down |
| ENSOCUG00000015462 | 0.423465583 | -1.239683374 | PRRG1    | Down |
| ENSOCUG00000021069 | 0.064930353 | -3.94496314  | -        | Down |
| ENSOCUG00000007066 | 0.424086083 | -1.237570954 | USP6NL   | Down |
| ENSOCUG00000024410 | 0           | -Inf         | -        | Down |
| ENSOCUG00000015520 | 0.131267219 | -2.929421411 | PHF3     | Down |

|                     |             |              |         |      |
|---------------------|-------------|--------------|---------|------|
| ENSOCUG00000006889  | 0.200360569 | -2.319329481 | PNPT1   | Down |
| ENSOCUG00000026115  | 0.246182858 | -2.022197786 | -       | Down |
| ENSOCUG00000002107  | 0.375452503 | -1.413297686 | CALM2   | Down |
| ENSOCUG00000026311  | 0.229516964 | -2.123327306 | -       | Down |
| ENSOCUG00000004591  | 0.116962724 | -3.09587928  | ZFC3H1  | Down |
| ENSOCUG00000012328  | 0.177759981 | -2.491997531 | RNF128  | Down |
| ENSOCUG00000000220  | 0.184851531 | -2.435561103 | MBNL2   | Down |
| ENSOCUG00000010475  | 0.165767258 | -2.592769014 | UTP20   | Down |
| ENSOCUG00000005265  | 0.132330088 | -2.91778697  | NRIP1   | Down |
| ENSOCUG00000029298  | 0.353812253 | -1.498944082 | CIR1    | Down |
| ENSOCUG00000006100  | 0.440261103 | -1.183568707 | PNO1    | Down |
| ENSOCUG00000003618  | 0.166303927 | -2.588105856 | MACC1   | Down |
| ENSOCUG00000004485  | 0.252495927 | -1.985667977 | E2F8    | Down |
| ENSOCUG00000034611  | 0.417351899 | -1.260663759 | CEP76   | Down |
| ENSOCUG00000017384  | 0.182148271 | -2.456814796 | NEMF    | Down |
| ENSOCUG00000002143  | 0.143940804 | -2.796452477 | VPS54   | Down |
| ENSOCUG00000000197  | 0.437540745 | -1.192510725 | HK2     | Down |
| ENSOCUG00000005932  | 0.223851619 | -2.159385345 | CCDC93  | Down |
| ENSOCUG00000015832  | 0.129724386 | -2.946478386 | OPA1    | Down |
| ENSOCUG00000031862  | 0.253218932 | -1.981542825 | ZNF146  | Down |
| ENSOCUG00000006781  | 0.183703307 | -2.444550498 | KPNA3   | Down |
| ENSOCUG00000004899  | 0.258803418 | -1.950071423 | PIK3CB  | Down |
| ENSOCUG00000009919  | 0.329832068 | -1.600196421 | SIRT1   | Down |
| ENSOCUG00000014516  | 0.049930242 | -4.323942305 | CCDC68  | Down |
| ENSOCUG00000023933  | 0.1181864   | -3.080864063 | CKAP2   | Down |
| ENSOCUG00000004211  | 0.428339104 | -1.223174704 | TMEM102 | Down |
| ENSOCUG00000002730  | 0.386123192 | -1.372866884 | LRRC1   | Down |
| ENSOCUG000000007835 | 0.241402205 | -2.050489238 | SCFD1   | Down |
| ENSOCUG00000009725  | 0.116833563 | -3.097473311 | AWAT1   | Down |
| ENSOCUG00000035839  | 0.391941875 | -1.351288377 | -       | Down |
| ENSOCUG00000003106  | 0.330333726 | -1.598003824 | -       | Down |
| ENSOCUG00000015242  | 0.441352434 | -1.17999694  | PIP5K1A | Down |
| ENSOCUG00000004898  | 0.301830957 | -1.728187311 | CDC6    | Down |
| ENSOCUG00000006014  | 0.156693189 | -2.673985628 | PDE6H   | Down |
| ENSOCUG00000010631  | 0.139264008 | -2.844105648 | PIK3CA  | Down |
| ENSOCUG00000015886  | 0.318443894 | -1.650888885 | YTHDC1  | Down |
| ENSOCUG00000010261  | 0.370189991 | -1.433662205 | EHF     | Down |
| ENSOCUG00000029112  | 0.439693131 | -1.1854311   | ND5     | Down |
| ENSOCUG00000011645  | 0.172155591 | -2.538215058 | AHI1    | Down |
| ENSOCUG00000013326  | 0.284659473 | -1.812690985 | EIF4G2  | Down |
| ENSOCUG00000035451  | 0.190985917 | -2.388461837 | -       | Down |
| ENSOCUG00000014338  | 0.191927941 | -2.381363342 | ABCA5   | Down |
| ENSOCUG00000035488  | 0.420313372 | -1.25046274  | -       | Down |
| ENSOCUG00000017849  | 0.198106932 | -2.335648731 | GCC2    | Down |

|                    |             |              |          |      |
|--------------------|-------------|--------------|----------|------|
| ENSOCUG00000014099 | 0.192442376 | -2.377501577 | KCTD9    | Down |
| ENSOCUG00000011383 | 0.282705542 | -1.822627932 | FAM241A  | Down |
| ENSOCUG00000012039 | 0.262470716 | -1.929771626 | EPRS1    | Down |
| ENSOCUG00000013239 | 0.216267721 | -2.209109739 | -        | Down |
| ENSOCUG00000027318 | 0.429949526 | -1.217760791 | WDR53    | Down |
| ENSOCUG00000007643 | 0.142685724 | -2.809087095 | NIPAL1   | Down |
| ENSOCUG00000000681 | 0.307883195 | -1.69954497  | TXLNG    | Down |
| ENSOCUG00000011554 | 0.158258167 | -2.659648146 | -        | Down |
| ENSOCUG00000024606 | 0.200533861 | -2.31808223  | MYO6     | Down |
| ENSOCUG00000004967 | 0.126339998 | -2.984616635 | ZNF654   | Down |
| ENSOCUG00000011224 | 0.415503777 | -1.267066503 | RNF24    | Down |
| ENSOCUG00000015532 | 0.421155009 | -1.247576771 | CACHD1   | Down |
| ENSOCUG00000011027 | 0.239741695 | -2.060447254 | CHIT1    | Down |
| ENSOCUG00000000587 | 0.156779461 | -2.67319152  | DNAJC13  | Down |
| ENSOCUG00000014307 | 0.447792611 | -1.159097371 | DUOX1    | Down |
| ENSOCUG00000021166 | 0.153504517 | -2.703646986 | -        | Down |
| ENSOCUG00000005257 | 0.318448273 | -1.650869045 | DNAJC21  | Down |
| ENSOCUG00000013416 | 0           | -Inf         | -        | Down |
| ENSOCUG00000004049 | 0.44553745  | -1.166381391 | TARDBP   | Down |
| ENSOCUG00000001142 | 0.227064577 | -2.138825435 | SNX13    | Down |
| ENSOCUG00000006693 | 0.29183277  | -1.776786203 | INTS2    | Down |
| ENSOCUG00000002926 | 0.113525044 | -3.138917505 | DLGAP5   | Down |
| ENSOCUG00000004753 | 0.452952153 | -1.142569433 | KANK1    | Down |
| ENSOCUG00000013117 | 0.184768174 | -2.436211821 | -        | Down |
| ENSOCUG00000009172 | 0.44120545  | -1.180477482 | IRX2     | Down |
| ENSOCUG00000016277 | 0.020106861 | -5.636168316 | EREG     | Down |
| ENSOCUG00000002494 | 0.374986071 | -1.415091087 | FBXO33   | Down |
| ENSOCUG00000007124 | 0.081930528 | -3.609455076 | TTK      | Down |
| ENSOCUG00000002225 | 0.349275908 | -1.517560963 | -        | Down |
| ENSOCUG00000034985 | 0.418793083 | -1.25569048  | FAM133B  | Down |
| ENSOCUG00000013490 | 0.443198872 | -1.173973886 | RRS1     | Down |
| ENSOCUG00000008387 | 0.446412284 | -1.163551367 | VSIG10   | Down |
| ENSOCUG00000008319 | 0           | -Inf         | -        | Down |
| ENSOCUG00000032016 | 0.338099461 | -1.564480379 | -        | Down |
| ENSOCUG00000010253 | 0.43613239  | -1.197161957 | TMEM209  | Down |
| ENSOCUG00000004462 | 0.283946125 | -1.816310869 | PCF11    | Down |
| ENSOCUG00000009036 | 0.084229684 | -3.569527428 | C16orf86 | Down |
| ENSOCUG00000002767 | 0.181912181 | -2.458685941 | CEP162   | Down |
| ENSOCUG00000005389 | 0.433258647 | -1.206699552 | MTF1     | Down |
| ENSOCUG00000004008 | 0.29120829  | -1.77987667  | CNDP1    | Down |
| ENSOCUG00000009414 | 0.248951244 | -2.006064871 | C17orf64 | Down |
| ENSOCUG00000012900 | 0.417764518 | -1.259238128 | RORA     | Down |
| ENSOCUG00000015739 | 0.405126289 | -1.30355639  | ABHD13   | Down |
| ENSOCUG00000021983 | 0.173191464 | -2.529560267 | -        | Down |

|                    |             |              |           |      |
|--------------------|-------------|--------------|-----------|------|
| ENSOCUG00000007230 | 0.198404431 | -2.333483846 | CEBPZ     | Down |
| ENSOCUG00000010609 | 0.1896311   | -2.398732507 | DUSP16    | Down |
| ENSOCUG00000014608 | 0.101507942 | -3.300335479 | FABP3     | Down |
| ENSOCUG00000009241 | 0.427688302 | -1.225368348 | RAB11FIP2 | Down |
| ENSOCUG00000001175 | 0.447366805 | -1.160469884 | HACD2     | Down |
| ENSOCUG00000025278 | 0.449864713 | -1.152436887 | ARHGAP32  | Down |
| ENSOCUG00000015354 | 0.233947253 | -2.095744805 | ITCH      | Down |
| ENSOCUG00000010045 | 0.178668474 | -2.484643001 | ZNF638    | Down |
| ENSOCUG00000002632 | 0.403846284 | -1.308121829 | KRT7      | Down |
| ENSOCUG00000015252 | 0.336196726 | -1.57262242  | BBS12     | Down |
| ENSOCUG00000016614 | 0.449148754 | -1.154734763 | NDEL1     | Down |
| ENSOCUG00000023368 | 0.27910578  | -1.841116092 | LNX1      | Down |
| ENSOCUG00000012942 | 0.195402835 | -2.355476695 | USP1      | Down |
| ENSOCUG00000002536 | 0.176882356 | -2.499137951 | SUZ12     | Down |
| ENSOCUG00000003284 | 0.418918794 | -1.255257486 | CLDN12    | Down |
| ENSOCUG00000030969 | 0           | -Inf         | -         | Down |
| ENSOCUG00000031899 | 0.39748325  | -1.331034027 | TAF13     | Down |
| ENSOCUG00000008373 | 0.433310601 | -1.206526564 | WASL      | Down |
| ENSOCUG00000024818 | 0.28792252  | -1.796247458 | -         | Down |
| ENSOCUG00000002763 | 0.445553148 | -1.16633056  | KIF1B     | Down |
| ENSOCUG00000010517 | 0.383538235 | -1.382557687 | SLC30A7   | Down |
| ENSOCUG00000016507 | 0.176703078 | -2.500600924 | ATP2B1    | Down |
| ENSOCUG00000001172 | 0.189173401 | -2.402218844 | CCDC138   | Down |
| ENSOCUG00000013619 | 0.375177272 | -1.414355662 | WDR44     | Down |
| ENSOCUG00000029691 | 0.162718762 | -2.619547489 | -         | Down |
| ENSOCUG00000005836 | 0.461685998 | -1.115016117 | NRG1      | Down |
| ENSOCUG00000028116 | 0.24834211  | -2.009599184 | OBI1      | Down |
| ENSOCUG00000016143 | 0.459237938 | -1.122686265 | GALNT6    | Down |
| ENSOCUG00000006705 | 0.287827271 | -1.796724803 | GPR156    | Down |
| ENSOCUG00000003847 | 0.187038081 | -2.418596061 | -         | Down |
| ENSOCUG00000003006 | 0.43546015  | -1.199387396 | LRP6      | Down |
| ENSOCUG00000035705 | 0.206233334 | -2.277650557 | -         | Down |
| ENSOCUG00000001097 | 0.316707117 | -1.658778807 | CGRRF1    | Down |
| ENSOCUG00000039030 | 0           | -Inf         | -         | Down |
| ENSOCUG00000006235 | 0.442694845 | -1.17561552  | PPP4R2    | Down |
| ENSOCUG00000007297 | 0.455386872 | -1.134835395 | AFDN      | Down |
| ENSOCUG00000027557 | 0.451917861 | -1.145867519 | -         | Down |
| ENSOCUG00000006052 | 0.216387    | -2.208314265 | SOS2      | Down |
| ENSOCUG00000004003 | 0.439095429 | -1.187393578 | MAPK1IP1L | Down |
| ENSOCUG00000024578 | 0.401682362 | -1.315872981 | C9orf85   | Down |
| ENSOCUG00000004603 | 0           | -Inf         | -         | Down |
| ENSOCUG00000010899 | 0.45478392  | -1.136746851 | -         | Down |
| ENSOCUG00000026433 | 0.381362811 | -1.390763931 | -         | Down |
| ENSOCUG00000004256 | 0.268502426 | -1.896992974 | WBP4      | Down |

|                    |             |              |          |      |
|--------------------|-------------|--------------|----------|------|
| ENSOCUG00000011619 | 0.285927204 | -1.806280205 | -        | Down |
| ENSOCUG00000012805 | 0.25029943  | -1.99827309  | GCLC     | Down |
| ENSOCUG00000015046 | 0.242424806 | -2.044390765 | LRPPRC   | Down |
| ENSOCUG00000021934 | 0.436099547 | -1.197270604 | TRMT1    | Down |
| ENSOCUG0000003708  | 0.103737145 | -3.268995529 | CFAP299  | Down |
| ENSOCUG00000008783 | 0.3522194   | -1.505453719 | UBXN2A   | Down |
| ENSOCUG00000004524 | 0.19170158  | -2.383065865 | AKAP9    | Down |
| ENSOCUG00000010468 | 0.450783026 | -1.149494901 | CSTF2    | Down |
| ENSOCUG00000025549 | 0.260746111 | -1.939282358 | -        | Down |
| ENSOCUG00000004936 | 0.324866958 | -1.622079077 | NAV3     | Down |
| ENSOCUG00000008197 | 0.042261568 | -4.56450989  | PCDH8    | Down |
| ENSOCUG00000011450 | 0.28892724  | -1.791221869 | WDR75    | Down |
| ENSOCUG00000010675 | 0.272378832 | -1.876313505 | ORC2     | Down |
| ENSOCUG00000006050 | 0.165602016 | -2.594207857 | SGO1     | Down |
| ENSOCUG00000001016 | 0.198547552 | -2.332443522 | -        | Down |
| ENSOCUG00000029460 | 0.235971302 | -2.083316681 | PNLIPRP2 | Down |
| ENSOCUG00000010660 | 0.251016093 | -1.994148236 | CUL3     | Down |
| ENSOCUG00000012331 | 0.177774341 | -2.491880985 | UBR1     | Down |
| ENSOCUG00000002152 | 0.390609654 | -1.356200489 | -        | Down |
| ENSOCUG00000004915 | 0           | -Inf         | PLEKHS1  | Down |
| ENSOCUG00000007121 | 0.422840713 | -1.241813802 | ATP6V0C  | Down |
| ENSOCUG00000002315 | 0.463631516 | -1.108949455 | LIMK2    | Down |
| ENSOCUG00000001320 | 0.284301601 | -1.81450587  | IFT74    | Down |
| ENSOCUG00000022457 | 0.302682406 | -1.724123275 | MSANTD4  | Down |
| ENSOCUG00000007397 | 0.105894037 | -3.239306742 | H1-1     | Down |
| ENSOCUG00000037993 | 0           | -Inf         | -        | Down |
| ENSOCUG00000000128 | 0.194947088 | -2.358845486 | C21orf91 | Down |
| ENSOCUG00000001096 | 0.336452902 | -1.57152353  | -        | Down |
| ENSOCUG00000017649 | 0.253357312 | -1.980754628 | ZBTB11   | Down |
| ENSOCUG00000016539 | 0.301932054 | -1.727704169 | TNFRSF21 | Down |
| ENSOCUG00000000141 | 0.264277721 | -1.919873286 | ACTR6    | Down |
| ENSOCUG00000007182 | 0.116063003 | -3.10701993  | GAS2L3   | Down |
| ENSOCUG00000013302 | 0.445950696 | -1.165043878 | CTR9     | Down |
| ENSOCUG00000022455 | 0.264004874 | -1.921363531 | NRAS     | Down |
| ENSOCUG00000017056 | 0.179011818 | -2.481873264 | PKN2     | Down |
| ENSOCUG00000002154 | 0.227289382 | -2.137397805 | IBTK     | Down |
| ENSOCUG00000005952 | 0.444239268 | -1.17059117  | BTBD10   | Down |
| ENSOCUG00000012065 | 0           | -Inf         | PTPRR    | Down |
| ENSOCUG00000001266 | 0.454002992 | -1.139226288 | TOMM70   | Down |
| ENSOCUG00000017804 | 0.303824684 | -1.718689008 | -        | Down |
| ENSOCUG00000004832 | 0.182114564 | -2.457081793 | USP47    | Down |
| ENSOCUG00000027275 | 0.340237663 | -1.555385244 | TM4SF1   | Down |
| ENSOCUG00000016016 | 0.257002863 | -1.960143662 | AKAP11   | Down |
| ENSOCUG00000012874 | 0.135369348 | -2.885026994 | CRYBG3   | Down |

|                     |             |              |          |      |
|---------------------|-------------|--------------|----------|------|
| ENSOCUG00000010907  | 0.11475558  | -3.12336406  | CUL5     | Down |
| ENSOCUG00000006411  | 0.434624933 | -1.202157155 | GPATCH3  | Down |
| ENSOCUG00000004640  | 0.29615396  | -1.755580717 | ZRANB2   | Down |
| ENSOCUG00000001161  | 0.446031291 | -1.16478317  | HYPK     | Down |
| ENSOCUG00000005163  | 0.116464061 | -3.102043267 | MAP2     | Down |
| ENSOCUG00000004983  | 0.20599291  | -2.27933341  | R3HCC1L  | Down |
| ENSOCUG00000000727  | 0.201037753 | -2.314461646 | NECTIN3  | Down |
| ENSOCUG00000017394  | 0.264593039 | -1.918152987 | SCNN1G   | Down |
| ENSOCUG00000012736  | 0.269206068 | -1.893217165 | HSPD1    | Down |
| ENSOCUG00000010785  | 0.038067414 | -4.715299603 | -        | Down |
| ENSOCUG00000009547  | 0.443804192 | -1.1720048   | -        | Down |
| ENSOCUG00000020931  | 0.109084913 | -3.196476515 | SAMD9    | Down |
| ENSOCUG00000013616  | 0.313854935 | -1.6718302   | -        | Down |
| ENSOCUG00000027060  | 0.32596096  | -1.617228909 | -        | Down |
| ENSOCUG00000007273  | 0.429013717 | -1.220904318 | NUFIP1   | Down |
| ENSOCUG00000001861  | 0.225681012 | -2.147643058 | XRN1     | Down |
| ENSOCUG00000006994  | 0.462449425 | -1.112632499 | F11R     | Down |
| ENSOCUG000000002167 | 0.233411788 | -2.099050673 | ZZZ3     | Down |
| ENSOCUG00000037790  | 0.147990398 | -2.756424526 | -        | Down |
| ENSOCUG00000004466  | 0.352093925 | -1.505967759 | WDR37    | Down |
| ENSOCUG00000013950  | 0.103026919 | -3.278906765 | KIF18A   | Down |
| ENSOCUG00000013477  | 0.459036477 | -1.123319295 | CEP20    | Down |
| ENSOCUG00000000699  | 0.103747802 | -3.268847327 | CENPE    | Down |
| ENSOCUG00000017448  | 0.3269767   | -1.612740259 | VBP1     | Down |
| ENSOCUG00000013922  | 0.43437435  | -1.20298918  | PSMD12   | Down |
| ENSOCUG00000023847  | 0.199566357 | -2.325059566 | CEP57L1  | Down |
| ENSOCUG00000009829  | 0.3342979   | -1.580793804 | PBRM1    | Down |
| ENSOCUG00000012421  | 0.24734496  | -2.015403592 | PTPN13   | Down |
| ENSOCUG00000002798  | 0.46875095  | -1.09310648  | ABHD12   | Down |
| ENSOCUG00000011083  | 0.347315846 | -1.525679862 | CNOT6    | Down |
| ENSOCUG00000004833  | 0.45786706  | -1.126999316 | -        | Down |
| ENSOCUG00000016661  | 0.238329145 | -2.06897271  | DRC7     | Down |
| ENSOCUG00000008840  | 0.442616505 | -1.175870846 | ATP10D   | Down |
| ENSOCUG00000015294  | 0.282528365 | -1.823532376 | BCLAF3   | Down |
| ENSOCUG00000030940  | 0.11395497  | -3.133464251 | FA2H     | Down |
| ENSOCUG00000007831  | 0.427626885 | -1.225575537 | MALT1    | Down |
| ENSOCUG00000015121  | 0.198042985 | -2.336114497 | LRRC4    | Down |
| ENSOCUG00000012457  | 0.192128461 | -2.379856843 | GOLGB1   | Down |
| ENSOCUG00000009878  | 0.244236998 | -2.033646332 | -        | Down |
| ENSOCUG00000017317  | 0.290771882 | -1.782040332 | CDC42BPA | Down |
| ENSOCUG00000012121  | 0.199728527 | -2.323887691 | U2SURP   | Down |
| ENSOCUG00000022768  | 0.399545148 | -1.323569562 | -        | Down |
| ENSOCUG00000015612  | 0.4275656   | -1.22578231  | NOL11    | Down |
| ENSOCUG00000001124  | 0.286053691 | -1.805642136 | ZC2HC1A  | Down |



|                     |             |              |          |      |
|---------------------|-------------|--------------|----------|------|
| ENSOCUG00000012519  | 0.40064301  | -1.319610788 | TIRAP    | Down |
| ENSOCUG00000014552  | 0.434504677 | -1.202556389 | TIPRL    | Down |
| ENSOCUG00000016892  | 0.452856987 | -1.14287258  | NOL10    | Down |
| ENSOCUG00000013308  | 0.315169265 | -1.665801244 | -        | Down |
| ENSOCUG00000008790  | 0.447372462 | -1.160451642 | KMT2E    | Down |
| ENSOCUG00000014545  | 0.454348479 | -1.138128845 | PSEN1    | Down |
| ENSOCUG00000001217  | 0.244815356 | -2.03023404  | MARCHF7  | Down |
| ENSOCUG00000014557  | 0.25549413  | -1.968637949 | CEP57    | Down |
| ENSOCUG00000013503  | 0.251125242 | -1.993521043 | FAM189A2 | Down |
| ENSOCUG00000005313  | 0.277388425 | -1.850020508 | HAT1     | Down |
| ENSOCUG00000013133  | 0.19528813  | -2.356323831 | NCKAP1   | Down |
| ENSOCUG00000003433  | 0.051380792 | -4.282627047 | CSF2     | Down |
| ENSOCUG00000005291  | 0.446100688 | -1.164558722 | RELCH    | Down |
| ENSOCUG00000013471  | 0.142256008 | -2.813438512 | LIPG     | Down |
| ENSOCUG00000004600  | 0.356562816 | -1.487771835 | RPS6KB1  | Down |
| ENSOCUG00000010213  | 0.257974623 | -1.954698938 | UPF3B    | Down |
| ENSOCUG00000017170  | 0.367556077 | -1.44396372  | -        | Down |
| ENSOCUG00000003590  | 0.141429703 | -2.821842947 | TMC5     | Down |
| ENSOCUG00000012398  | 0.277786205 | -1.847953139 | SLC30A1  | Down |
| ENSOCUG00000026070  | 0.463461858 | -1.109477481 | FAM110A  | Down |
| ENSOCUG00000010058  | 0.414087907 | -1.271991024 | ZBTB44   | Down |
| ENSOCUG00000024778  | 0.086533831 | -3.530591912 | -        | Down |
| ENSOCUG000000027456 | 0.457159575 | -1.129230258 | DSTN     | Down |
| ENSOCUG00000005746  | 0.257345024 | -1.958224209 | KLK4     | Down |
| ENSOCUG00000014835  | 0.177037728 | -2.497871251 | SMC4     | Down |
| ENSOCUG00000008843  | 0.265603643 | -1.912653161 | RBM26    | Down |
| ENSOCUG00000003829  | 0.474327794 | -1.076043686 | EZR      | Down |
| ENSOCUG00000011103  | 0.321398973 | -1.637562774 | TRMT10C  | Down |
| ENSOCUG00000004665  | 0.213170189 | -2.2299224   | FGD6     | Down |
| ENSOCUG00000013781  | 0.265343524 | -1.914066755 | RSRC2    | Down |
| ENSOCUG00000014267  | 0.260380056 | -1.941309144 | RDX      | Down |
| ENSOCUG00000034440  | 0.349793786 | -1.515423435 | -        | Down |
| ENSOCUG00000004962  | 0.180710812 | -2.468245266 | PAPOLG   | Down |
| ENSOCUG00000016483  | 0.274829375 | -1.86339188  | NUFIP2   | Down |
| ENSOCUG00000025879  | 0.475361707 | -1.072902403 | ARHGEF5  | Down |
| ENSOCUG00000015427  | 0.195760151 | -2.352840979 | -        | Down |
| ENSOCUG00000007333  | 0.197695726 | -2.338646414 | RBBP8    | Down |
| ENSOCUG00000006287  | 0.073192063 | -3.772168972 | -        | Down |
| ENSOCUG00000024795  | 0.229734637 | -2.121959705 | MNDA     | Down |
| ENSOCUG00000001732  | 0.457889641 | -1.126928169 | TMEM184C | Down |
| ENSOCUG00000024334  | 0.475078603 | -1.073761864 | AP1M2    | Down |
| ENSOCUG00000010109  | 0.205664858 | -2.281632792 | BIRC3    | Down |
| ENSOCUG00000006793  | 0.38636227  | -1.371973879 | LMO7     | Down |
| ENSOCUG00000022370  | 0.379758889 | -1.39684436  | PAIP2B   | Down |

|                    |             |              |           |      |
|--------------------|-------------|--------------|-----------|------|
| ENSOCUG00000016021 | 0.434902274 | -1.201236843 | LRRC20    | Down |
| ENSOCUG00000012181 | 0.449314288 | -1.154203156 | LEO1      | Down |
| ENSOCUG00000007723 | 0.360306728 | -1.472702505 | NCK1      | Down |
| ENSOCUG00000007383 | 0.36673138  | -1.447204379 | CCNT1     | Down |
| ENSOCUG00000016052 | 0.380004238 | -1.395912585 | RAD17     | Down |
| ENSOCUG00000009882 | 0.463713985 | -1.108692859 | NCAPH     | Down |
| ENSOCUG00000036144 | 0.455793957 | -1.133546296 | -         | Down |
| ENSOCUG00000012338 | 0.326853595 | -1.613283531 | DDX3X     | Down |
| ENSOCUG00000017847 | 0.36247145  | -1.464060729 | TMTC2     | Down |
| ENSOCUG00000007150 | 0.272046135 | -1.878076761 | VPS4B     | Down |
| ENSOCUG00000002961 | 0.466857657 | -1.098945349 | WDR12     | Down |
| ENSOCUG00000002224 | 0.300909963 | -1.732596219 | UBLCP1    | Down |
| ENSOCUG00000038979 | 0.24069641  | -2.054713471 | -         | Down |
| ENSOCUG00000009283 | 0.458804369 | -1.124048964 | -         | Down |
| ENSOCUG00000016649 | 0.406780335 | -1.297678157 | SDR42E1   | Down |
| ENSOCUG00000002047 | 0.212178001 | -2.236653012 | TRPM8     | Down |
| ENSOCUG00000007656 | 0.377973761 | -1.403642009 | TEC       | Down |
| ENSOCUG00000033989 | 0.24676693  | -2.018779025 | -         | Down |
| ENSOCUG00000016600 | 0.470930217 | -1.086414801 | GABARAPL2 | Down |
| ENSOCUG00000003815 | 0.184829763 | -2.435731    | ZFX       | Down |
| ENSOCUG00000013583 | 0.37854397  | -1.401467207 | CDK17     | Down |
| ENSOCUG00000011464 | 0.381233334 | -1.391253825 | CLDN1     | Down |
| ENSOCUG00000016049 | 0.445756738 | -1.16567149  | COA7      | Down |
| ENSOCUG00000014549 | 0.321030776 | -1.639216487 | FAM76B    | Down |
| ENSOCUG00000007001 | 0           | -Inf         | CPA1      | Down |
| ENSOCUG00000011339 | 0.256188808 | -1.964720645 | SC5D      | Down |
| ENSOCUG00000036551 | 0.074799358 | -3.740830293 | -         | Down |
| ENSOCUG00000011878 | 0.281128013 | -1.830700875 | SLC35F2   | Down |
| ENSOCUG00000027961 | 0.232242144 | -2.106298297 | PELI1     | Down |
| ENSOCUG00000001215 | 0.209745126 | -2.253290811 | HIPK3     | Down |
| ENSOCUG00000005617 | 0.405861782 | -1.300939602 | -         | Down |
| ENSOCUG00000029362 | 0.19460214  | -2.361400519 | ZNF148    | Down |
| ENSOCUG00000007575 | 0.131754512 | -2.924075729 | DDIAS     | Down |
| ENSOCUG00000010789 | 0.228705561 | -2.128436649 | TMEM168   | Down |
| ENSOCUG00000029103 | 0.251691302 | -1.990272734 | COX3      | Down |
| ENSOCUG00000000821 | 0.470579789 | -1.087488734 | -         | Down |
| ENSOCUG00000000652 | 0.304142063 | -1.717182741 | -         | Down |
| ENSOCUG00000015633 | 0.236305075 | -2.081277481 | CUL4B     | Down |
| ENSOCUG00000010430 | 0.463933161 | -1.108011124 | KHDC4     | Down |
| ENSOCUG00000004077 | 0.422125664 | -1.244255552 | SLC4A11   | Down |
| ENSOCUG00000003534 | 0.455768866 | -1.13362572  | PPP2R5E   | Down |
| ENSOCUG00000000020 | 0.174736731 | -2.516745191 | SMCHD1    | Down |
| ENSOCUG00000007754 | 0.114795724 | -3.122859192 | CAMSAP2   | Down |
| ENSOCUG00000016532 | 0.1900452   | -2.395585511 | ATP13A3   | Down |

|                     |             |              |          |      |
|---------------------|-------------|--------------|----------|------|
| ENSOCUG00000012323  | 0.443150093 | -1.17413268  | FBXO45   | Down |
| ENSOCUG00000009190  | 0.465009027 | -1.104669371 | -        | Down |
| ENSOCUG00000012386  | 0.258146044 | -1.953740605 | DCUN1D1  | Down |
| ENSOCUG00000015583  | 0.203503624 | -2.29687361  | RNF6     | Down |
| ENSOCUG00000004308  | 0.399698932 | -1.323014376 | -        | Down |
| ENSOCUG00000023952  | 0.321663722 | -1.636374861 | NTNG1    | Down |
| ENSOCUG00000006510  | 0.281994589 | -1.826260614 | C9orf72  | Down |
| ENSOCUG00000023666  | 0.114457387 | -3.127117513 | SNX16    | Down |
| ENSOCUG00000005170  | 0.195456627 | -2.355079591 | BRWD3    | Down |
| ENSOCUG00000002765  | 0.257651352 | -1.956507934 | LUC7L3   | Down |
| ENSOCUG00000006833  | 0.050202251 | -4.316104131 | DNAH12   | Down |
| ENSOCUG00000013378  | 0.464620193 | -1.105876239 | PAK1IP1  | Down |
| ENSOCUG00000011743  | 0.22902373  | -2.126431008 | SLU7     | Down |
| ENSOCUG00000007055  | 0.491974523 | -1.023344488 | PLEKHA6  | Down |
| ENSOCUG00000015866  | 0.455729257 | -1.133751102 | BPTF     | Down |
| ENSOCUG00000008145  | 0.461311459 | -1.116186966 | SMNDC1   | Down |
| ENSOCUG00000007043  | 0.331115571 | -1.594593239 | -        | Down |
| ENSOCUG000000036167 | 0.42311372  | -1.240882628 | -        | Down |
| ENSOCUG00000017748  | 0.237907786 | -2.071525608 | SPART    | Down |
| ENSOCUG00000016630  | 0.143229829 | -2.803596113 | KIF21A   | Down |
| ENSOCUG00000001874  | 0.216260055 | -2.209160882 | ATR      | Down |
| ENSOCUG00000025297  | 0.153981079 | -2.699175006 | -        | Down |
| ENSOCUG00000003239  | 0.063577664 | -3.975336181 | TMEM236  | Down |
| ENSOCUG00000015734  | 0.295771059 | -1.7574472   | LIG4     | Down |
| ENSOCUG00000014040  | 0.302134462 | -1.726737346 | ENDOD1   | Down |
| ENSOCUG00000012668  | 0.170011585 | -2.556295035 | RICTOR   | Down |
| ENSOCUG00000003617  | 0.350493065 | -1.512542194 | MTIF2    | Down |
| ENSOCUG00000001975  | 0.433749325 | -1.205066581 | -        | Down |
| ENSOCUG00000029249  | 0.102960367 | -3.279838994 | -        | Down |
| ENSOCUG00000000534  | 0           | -Inf         | LCP2     | Down |
| ENSOCUG00000015528  | 0.444995712 | -1.168136661 | C16orf72 | Down |
| ENSOCUG00000003110  | 0.31468582  | -1.668015924 | PRMT9    | Down |
| ENSOCUG00000001785  | 0.165726418 | -2.593124498 | STX19    | Down |
| ENSOCUG00000006171  | 0.16813096  | -2.572342684 | MINDY2   | Down |
| ENSOCUG00000010912  | 0.446054102 | -1.164709389 | KRTDAP   | Down |
| ENSOCUG00000005480  | 0.111662984 | -3.162777085 | TAF4B    | Down |
| ENSOCUG00000002975  | 0.244352046 | -2.032966907 | STXBP3   | Down |
| ENSOCUG00000000896  | 0.429505148 | -1.219252672 | TTC33    | Down |
| ENSOCUG00000007050  | 0.329895699 | -1.599918126 | RBM39    | Down |
| ENSOCUG00000017253  | 0.479171751 | -1.061385237 | -        | Down |
| ENSOCUG00000016737  | 0.222617296 | -2.167362406 | ZFR      | Down |
| ENSOCUG00000001818  | 0.265678296 | -1.91224772  | KPNA4    | Down |
| ENSOCUG00000023811  | 0           | -Inf         | H3C13    | Down |
| ENSOCUG00000002814  | 0.123341571 | -3.019268973 | TOP2A    | Down |

|                    |             |              |          |      |
|--------------------|-------------|--------------|----------|------|
| ENSOCUG00000009931 | 0.369847123 | -1.43499904  | OSGIN2   | Down |
| ENSOCUG00000009466 | 0.111300707 | -3.167465343 | HEPHL1   | Down |
| ENSOCUG00000000868 | 0.006613329 | -7.240407516 | CCL20    | Down |
| ENSOCUG00000001772 | 0.312859824 | -1.676411687 | SLC20A1  | Down |
| ENSOCUG00000015198 | 0.321528116 | -1.636983195 | VCPIP1   | Down |
| ENSOCUG00000037416 | 0.131587943 | -2.925900788 | -        | Down |
| ENSOCUG00000007695 | 0.35760842  | -1.483547389 | ATG4C    | Down |
| ENSOCUG00000011276 | 0.457990844 | -1.126609338 | TMA16    | Down |
| ENSOCUG00000027593 | 0.093632449 | -3.416847597 | PSORSIC2 | Down |
| ENSOCUG00000006096 | 0.310061454 | -1.68937391  | ANKRD50  | Down |
| ENSOCUG00000004878 | 0.215112072 | -2.216839604 | ORC3     | Down |
| ENSOCUG00000012019 | 0.318261684 | -1.651714614 | RNF20    | Down |
| ENSOCUG00000004006 | 0.346800517 | -1.527822044 | SOCS4    | Down |
| ENSOCUG00000004075 | 0.323675325 | -1.627380708 | LIN7C    | Down |
| ENSOCUG00000004921 | 0.230956004 | -2.114310043 | DCLRE1A  | Down |
| ENSOCUG00000006910 | 0.483086836 | -1.049645556 | CDCP1    | Down |
| ENSOCUG00000000170 | 0.32654718  | -1.614636644 | NUP155   | Down |
| ENSOCUG00000012211 | 0.248772116 | -2.007103307 | -        | Down |
| ENSOCUG00000011601 | 0.228080473 | -2.132385157 | THOC1    | Down |
| ENSOCUG00000014899 | 0.312108537 | -1.679880273 | MRE11    | Down |
| ENSOCUG00000010928 | 0.470236958 | -1.088540164 | -        | Down |
| ENSOCUG00000008342 | 0.373974312 | -1.418988918 | FGFR1OP2 | Down |
| ENSOCUG00000017003 | 0.384268516 | -1.379813315 | RAB1A    | Down |
| ENSOCUG00000017333 | 0.460522093 | -1.118657724 | MRS2     | Down |
| ENSOCUG00000032694 | 0.25616157  | -1.964874041 | -        | Down |
| ENSOCUG00000015531 | 0.388480171 | -1.364087134 | CEP350   | Down |
| ENSOCUG00000024056 | 0.357908334 | -1.482337957 | PPWD1    | Down |
| ENSOCUG00000007732 | 0.482941544 | -1.050079521 | PPARD    | Down |
| ENSOCUG00000013274 | 0           | -Inf         | FAM71F2  | Down |
| ENSOCUG00000015867 | 0.247985061 | -2.011674883 | ARFGEF1  | Down |
| ENSOCUG00000008716 | 0.410580465 | -1.284263107 | NBEAL1   | Down |
| ENSOCUG00000017950 | 0.209107048 | -2.257686408 | TAF2     | Down |
| ENSOCUG00000012765 | 0.166611815 | -2.585437384 | -        | Down |
| ENSOCUG00000022143 | 0.475107831 | -1.073673107 | -        | Down |
| ENSOCUG00000015766 | 0.327953773 | -1.608435623 | PATJ     | Down |
| ENSOCUG00000024977 | 0.285796393 | -1.806940388 | ACSBG1   | Down |
| ENSOCUG0000002397  | 0.442696589 | -1.175609838 | UBE4A    | Down |
| ENSOCUG00000008350 | 0.308555757 | -1.69639688  | ZMYM1    | Down |
| ENSOCUG00000016028 | 0.473535514 | -1.078455468 | RPF2     | Down |
| ENSOCUG00000031561 | 0.469870606 | -1.089664575 | TARS2    | Down |
| ENSOCUG00000007323 | 0.454830963 | -1.136597623 | -        | Down |
| ENSOCUG00000016741 | 0.389615066 | -1.359878629 | NKRF     | Down |
| ENSOCUG00000012080 | 0.274032225 | -1.867582538 | SLC18A2  | Down |
| ENSOCUG00000007344 | 0.351967225 | -1.506487002 | -        | Down |

|                     |             |              |          |      |
|---------------------|-------------|--------------|----------|------|
| ENSOCUG00000013211  | 0.313631871 | -1.672855925 | SPRTN    | Down |
| ENSOCUG00000015381  | 0.253802892 | -1.978219587 | QSER1    | Down |
| ENSOCUG00000002103  | 0.145286965 | -2.783022821 | STPG4    | Down |
| ENSOCUG00000015247  | 0.455725108 | -1.133764238 | ZDHC14   | Down |
| ENSOCUG00000028155  | 0.153462714 | -2.704039923 | -        | Down |
| ENSOCUG00000004016  | 0.344490368 | -1.537464449 | RNPC3    | Down |
| ENSOCUG00000002249  | 0.339764719 | -1.557392045 | DHRS7    | Down |
| ENSOCUG000000025834 | 0.404695957 | -1.305089659 | YAP1     | Down |
| ENSOCUG00000008381  | 0.443564893 | -1.17278291  | EPB4IL5  | Down |
| ENSOCUG00000011265  | 0.344400091 | -1.537842569 | ZSCAN29  | Down |
| ENSOCUG00000009146  | 0.187448114 | -2.415436783 | SCYL2    | Down |
| ENSOCUG00000015383  | 0.341190105 | -1.551352288 | PLEKHM3  | Down |
| ENSOCUG00000005723  | 0.259460874 | -1.946411097 | ATAD2B   | Down |
| ENSOCUG00000000817  | 0.291839778 | -1.776751557 | SPAG9    | Down |
| ENSOCUG00000021120  | 0.019572244 | -5.675046995 | MUC15    | Down |
| ENSOCUG000000025398 | 0.276609969 | -1.854074941 | CWF19L2  | Down |
| ENSOCUG00000017759  | 0.260261762 | -1.941964729 | PIGA     | Down |
| ENSOCUG00000009295  | 0.164869843 | -2.60060056  | EEA1     | Down |
| ENSOCUG00000016177  | 0.465186165 | -1.104119905 | EPB4IL4B | Down |
| ENSOCUG00000013382  | 0.289449217 | -1.78861784  | STX3     | Down |
| ENSOCUG00000006204  | 0           | -Inf         | UBASH3A  | Down |
| ENSOCUG00000013635  | 0.293901964 | -1.766593096 | AFF4     | Down |
| ENSOCUG00000006056  | 0.163574787 | -2.611977703 | MAP3K8   | Down |
| ENSOCUG00000007493  | 0.166430121 | -2.587011531 | -        | Down |
| ENSOCUG00000012809  | 0.282018107 | -1.826140303 | SLC25A24 | Down |
| ENSOCUG00000004637  | 0.392378714 | -1.349681316 | KIN      | Down |
| ENSOCUG00000012236  | 0.464331535 | -1.106772829 | TMEM30B  | Down |
| ENSOCUG00000006432  | 0.195608416 | -2.35395965  | IPMK     | Down |
| ENSOCUG00000009367  | 0.470205391 | -1.088637015 | SETD7    | Down |
| ENSOCUG00000000429  | 0.423850248 | -1.238373465 | MPHOSPH8 | Down |
| ENSOCUG000000033412 | 0.21369735  | -2.226359079 | -        | Down |
| ENSOCUG00000001171  | 0.110881251 | -3.172912659 | NUF2     | Down |
| ENSOCUG00000012023  | 0.455811712 | -1.133490099 | EIF2S1   | Down |
| ENSOCUG00000023043  | 0.476758288 | -1.068670075 | TLE3     | Down |
| ENSOCUG00000027568  | 0.152324028 | -2.71478456  | -        | Down |
| ENSOCUG00000011573  | 0.283135693 | -1.820434461 | -        | Down |
| ENSOCUG00000014244  | 0.261261296 | -1.936434677 | -        | Down |
| ENSOCUG000000024536 | 0.14864247  | -2.750081715 | -        | Down |
| ENSOCUG00000000724  | 0.453677437 | -1.140261183 | SLC7A7   | Down |
| ENSOCUG00000009234  | 0.169938915 | -2.556911833 | USP45    | Down |
| ENSOCUG00000012801  | 0.037662299 | -4.730735119 | CRISP3   | Down |
| ENSOCUG00000007014  | 0.279771766 | -1.837677717 | SH3D19   | Down |
| ENSOCUG000000029610 | 0.471930003 | -1.083355201 | B4GALT3  | Down |
| ENSOCUG00000029486  | 0.280759091 | -1.832595355 | GSTA5    | Down |

|                     |             |              |         |      |
|---------------------|-------------|--------------|---------|------|
| ENSOCUG00000017918  | 0.260630608 | -1.939921575 | GNPDA2  | Down |
| ENSOCUG00000010426  | 0.376216016 | -1.410366826 | AGFG1   | Down |
| ENSOCUG00000001224  | 0.252804236 | -1.98390746  | -       | Down |
| ENSOCUG00000013727  | 0.37893814  | -1.399965743 | -       | Down |
| ENSOCUG00000005315  | 0.478951003 | -1.06205002  | TFAP2A  | Down |
| ENSOCUG00000003867  | 0.376025275 | -1.411098458 | SON     | Down |
| ENSOCUG00000015471  | 0.469906707 | -1.089553735 | PLAA    | Down |
| ENSOCUG000000006715 | 0.269863211 | -1.889699782 | -       | Down |
| ENSOCUG00000027759  | 0.254832674 | -1.972377828 | -       | Down |
| ENSOCUG00000009908  | 0.241178034 | -2.051829582 | ERI2    | Down |
| ENSOCUG00000003640  | 0.334744669 | -1.578867016 | SLC6A4  | Down |
| ENSOCUG00000021896  | 0.271660545 | -1.880123048 | -       | Down |
| ENSOCUG00000022009  | 0.312687736 | -1.677205458 | -       | Down |
| ENSOCUG00000009628  | 0.213813576 | -2.225574637 | FRYL    | Down |
| ENSOCUG00000001306  | 0.329242865 | -1.602775918 | SPTLC3  | Down |
| ENSOCUG00000017796  | 0.17590389  | -2.507140706 | -       | Down |
| ENSOCUG00000020917  | 0.441165438 | -1.180608322 | PIK3AP1 | Down |
| ENSOCUG000000006646 | 0.242839917 | -2.041922511 | UBR3    | Down |
| ENSOCUG00000012438  | 0.465800279 | -1.102216591 | NBEAL2  | Down |
| ENSOCUG00000014031  | 0.066406515 | -3.912531405 | TGM6    | Down |
| ENSOCUG000000026994 | 0.493514406 | -1.018835897 | TUBA4A  | Down |
| ENSOCUG00000005685  | 0.468150369 | -1.0949561   | TRIP11  | Down |
| ENSOCUG00000010337  | 0.281712895 | -1.827702491 | DOCK4   | Down |
| ENSOCUG00000015847  | 0.28890388  | -1.791338514 | CSPP1   | Down |
| ENSOCUG00000002706  | 0.463280338 | -1.11004264  | MYCBPAP | Down |
| ENSOCUG000000025164 | 0.481012347 | -1.055854168 | -       | Down |
| ENSOCUG00000029385  | 0.189685857 | -2.398315979 | -       | Down |
| ENSOCUG00000007093  | 0.192577995 | -2.376485234 | IPO7    | Down |
| ENSOCUG00000014956  | 0.234466379 | -2.092547029 | -       | Down |
| ENSOCUG00000006600  | 0.307824123 | -1.699821799 | BIRC6   | Down |
| ENSOCUG00000004657  | 0.380799185 | -1.392897705 | NR2C1   | Down |
| ENSOCUG00000002993  | 0.148445723 | -2.751992572 | WDR47   | Down |
| ENSOCUG00000024669  | 0.080080705 | -3.642401508 | -       | Down |
| ENSOCUG00000021294  | 0.220565392 | -2.180721651 | TMEM95  | Down |
| ENSOCUG00000002888  | 0.474573313 | -1.075297121 | DDX21   | Down |
| ENSOCUG00000030260  | 0.115090944 | -3.119153782 | -       | Down |
| ENSOCUG00000016430  | 0.33909807  | -1.560225524 | SEC63   | Down |
| ENSOCUG00000011869  | 0.020047629 | -5.640424582 | ELMOD1  | Down |
| ENSOCUG00000004217  | 0.26053994  | -1.940423542 | STX17   | Down |
| ENSOCUG00000006650  | 0.333373326 | -1.584789421 | ETF1    | Down |
| ENSOCUG000000035129 | 0.158842523 | -2.654330916 | -       | Down |
| ENSOCUG00000004659  | 0.470204957 | -1.088638347 | CCNH    | Down |
| ENSOCUG00000026252  | 0.486348714 | -1.039936992 | -       | Down |
| ENSOCUG00000029827  | 0.089873537 | -3.475959814 | -       | Down |

|                     |             |              |          |      |
|---------------------|-------------|--------------|----------|------|
| ENSOCUG00000005068  | 0.228791112 | -2.127897087 | KLF8     | Down |
| ENSOCUG00000003016  | 0.333344474 | -1.584914283 | -        | Down |
| ENSOCUG00000004486  | 0.332776245 | -1.587375643 | CHL1     | Down |
| ENSOCUG00000002461  | 0.311807036 | -1.681274612 | EMC2     | Down |
| ENSOCUG00000017407  | 0.483073185 | -1.049686324 | -        | Down |
| ENSOCUG00000000750  | 0.468398488 | -1.094191677 | PRMT3    | Down |
| ENSOCUG00000008096  | 0.467551648 | -1.096802354 | RPRD1A   | Down |
| ENSOCUG00000002159  | 0.268033419 | -1.899515206 | PTPN12   | Down |
| ENSOCUG00000012987  | 0.396043581 | -1.336268901 | -        | Down |
| ENSOCUG00000015184  | 0.149196518 | -2.74471423  | MYBL1    | Down |
| ENSOCUG00000002470  | 0.388293108 | -1.364781996 | KLF6     | Down |
| ENSOCUG00000001622  | 0.456480675 | -1.131374309 | -        | Down |
| ENSOCUG00000000407  | 0.060228776 | -4.053403256 | DCT      | Down |
| ENSOCUG00000007436  | 0.258006907 | -1.954518405 | ZW10     | Down |
| ENSOCUG00000004780  | 0.466269564 | -1.100763833 | ABRAXAS2 | Down |
| ENSOCUG00000024272  | 0.412204603 | -1.278567478 | NEXN     | Down |
| ENSOCUG00000014767  | 0.23381989  | -2.096530435 | PAG1     | Down |
| ENSOCUG00000007539  | 0.102760839 | -3.28263752  | FANCM    | Down |
| ENSOCUG00000003608  | 0.201196151 | -2.313325389 | DAAM1    | Down |
| ENSOCUG00000011629  | 0.475357077 | -1.072916457 | ANKRD17  | Down |
| ENSOCUG00000014589  | 0.439244709 | -1.186903186 | -        | Down |
| ENSOCUG00000016980  | 0.47624938  | -1.070210881 | UTP6     | Down |
| ENSOCUG00000017240  | 0.219077155 | -2.190489045 | CDC5L    | Down |
| ENSOCUG00000012997  | 0.42567028  | -1.232191728 | EPHX3    | Down |
| ENSOCUG00000025948  | 0.194646137 | -2.361074378 | RPS6KA3  | Down |
| ENSOCUG00000009397  | 0.314806114 | -1.667464534 | STRBP    | Down |
| ENSOCUG00000013561  | 0.477466634 | -1.066528176 | GFM1     | Down |
| ENSOCUG00000015943  | 0.32121191  | -1.638402708 | -        | Down |
| ENSOCUG00000013930  | 0.343789313 | -1.540403395 | NOC3L    | Down |
| ENSOCUG00000012206  | 0.249329655 | -2.003873609 | DDX46    | Down |
| ENSOCUG00000009465  | 0.150872711 | -2.728596212 | AGL      | Down |
| ENSOCUG00000031526  | 0.070662587 | -3.822909615 | PMAIP1   | Down |
| ENSOCUG00000010647  | 0.293803719 | -1.767075437 | -        | Down |
| ENSOCUG00000010700  | 0.476054998 | -1.070799838 | URB2     | Down |
| ENSOCUG00000016428  | 0.432487655 | -1.209269141 | RCBTB2   | Down |
| ENSOCUG00000017576  | 0.491128616 | -1.025827209 | ARRDC1   | Down |
| ENSOCUG00000014717  | 0.40349297  | -1.309384557 | -        | Down |
| ENSOCUG000000030320 | 0.464541703 | -1.106119979 | RAP1A    | Down |
| ENSOCUG00000014438  | 0.481104089 | -1.055579034 | -        | Down |
| ENSOCUG00000015445  | 0.487303542 | -1.037107385 | SQSTM1   | Down |
| ENSOCUG00000002100  | 0.389945307 | -1.358656305 | PLEKHA1  | Down |
| ENSOCUG00000016808  | 0.483171111 | -1.049393897 | HSDL2    | Down |
| ENSOCUG00000006663  | 0.263098551 | -1.926324792 | DIS3     | Down |
| ENSOCUG00000006709  | 0.258716423 | -1.950556459 | MED13    | Down |

|                     |             |              |          |      |
|---------------------|-------------|--------------|----------|------|
| ENSOCUG00000003507  | 0.163937497 | -2.608782217 | HAUS6    | Down |
| ENSOCUG00000009764  | 0.248816586 | -2.006845438 | GPD2     | Down |
| ENSOCUG000000008401 | 0.287673048 | -1.797498031 | SCNN1B   | Down |
| ENSOCUG000000025781 | 0.476915627 | -1.068194039 | GPATCH4  | Down |
| ENSOCUG000000016298 | 0.382793715 | -1.385360953 | ATP6V1H  | Down |
| ENSOCUG000000008269 | 0.209900732 | -2.252220899 | ANKRD26  | Down |
| ENSOCUG000000015333 | 0.34356693  | -1.541336917 | ZKSCAN1  | Down |
| ENSOCUG000000012082 | 0.354099568 | -1.497773011 | ATAD1    | Down |
| ENSOCUG000000034682 | 0.073823088 | -3.759784098 | -        | Down |
| ENSOCUG000000005647 | 0.430299665 | -1.216586379 | RP2      | Down |
| ENSOCUG000000000338 | 0.495347671 | -1.013486627 | ATP1B3   | Down |
| ENSOCUG000000008774 | 0.252367455 | -1.986402218 | PTEN     | Down |
| ENSOCUG000000009771 | 0.391138969 | -1.354246815 | -        | Down |
| ENSOCUG000000003807 | 0.467844483 | -1.095899054 | SUV39H1  | Down |
| ENSOCUG000000000713 | 0.422180638 | -1.244067679 | TMEM135  | Down |
| ENSOCUG000000003320 | 0.253498579 | -1.979950435 | DENND4C  | Down |
| ENSOCUG000000014088 | 0.363239834 | -1.461005675 | ETNK1    | Down |
| ENSOCUG000000011055 | 0.413518028 | -1.273977869 | SLC9A3   | Down |
| ENSOCUG000000033491 | 0           | -Inf         | -        | Down |
| ENSOCUG000000015457 | 0.48116259  | -1.055403616 | FAM98A   | Down |
| ENSOCUG000000012587 | 0.483672287 | -1.047898217 | -        | Down |
| ENSOCUG000000026707 | 0.340577191 | -1.553946276 | TRIM23   | Down |
| ENSOCUG000000005019 | 0.272837861 | -1.87388424  | CAND1    | Down |
| ENSOCUG000000009730 | 0.359651517 | -1.475328404 | BRCC3    | Down |
| ENSOCUG000000015503 | 0.462168805 | -1.11350821  | ZC3H14   | Down |
| ENSOCUG000000015626 | 0.22043475  | -2.181576423 | -        | Down |
| ENSOCUG000000006378 | 0.226938913 | -2.139624085 | TOGARAM1 | Down |
| ENSOCUG000000005133 | 0.14680595  | -2.768017657 | -        | Down |
| ENSOCUG000000023214 | 0           | -Inf         | -        | Down |
| ENSOCUG000000007137 | 0.317696797 | -1.654277551 | CYB5R4   | Down |
| ENSOCUG000000013380 | 0.321130019 | -1.638770562 | ADAM9    | Down |
| ENSOCUG000000009776 | 0.244972089 | -2.029310713 | ZHX1     | Down |
| ENSOCUG000000004700 | 0.321598056 | -1.636669407 | -        | Down |
| ENSOCUG000000007824 | 0.215575056 | -2.213737842 | G2E3     | Down |
| ENSOCUG000000008723 | 0.335951632 | -1.573674555 | YTHDF3   | Down |
| ENSOCUG000000027066 | 0.318120643 | -1.652354103 | -        | Down |
| ENSOCUG000000008870 | 0.273008447 | -1.872982506 | BRWD1    | Down |
| ENSOCUG000000000661 | 0.289498673 | -1.788371357 | CCNT2    | Down |
| ENSOCUG000000020986 | 0.478341977 | -1.063885695 | RNF25    | Down |
| ENSOCUG000000026859 | 0.482452576 | -1.05154096  | -        | Down |
| ENSOCUG000000029090 | 0.337268171 | -1.568031921 | ND2      | Down |
| ENSOCUG000000016888 | 0.443338605 | -1.173519101 | IARS1    | Down |
| ENSOCUG000000030959 | 0.06320832  | -3.98374171  | IDI2     | Down |
| ENSOCUG000000003533 | 0           | -Inf         | RASGRF2  | Down |



|                    |             |              |          |      |
|--------------------|-------------|--------------|----------|------|
| ENSOCUG00000029523 | 0.180457161 | -2.470271703 | -        | Down |
| ENSOCUG00000029251 | 0.258328784 | -1.95271969  | -        | Down |
| ENSOCUG00000004413 | 0.245792375 | -2.024487936 | APIAR    | Down |
| ENSOCUG00000025191 | 0.143206719 | -2.803828917 | -        | Down |
| ENSOCUG00000004295 | 0.451867486 | -1.146028344 | ZRSR2    | Down |
| ENSOCUG00000005515 | 0.461022771 | -1.117090084 | HIBCH    | Down |
| ENSOCUG00000012992 | 0.231293891 | -2.112200936 | MTMR6    | Down |
| ENSOCUG00000029177 | 0.287090394 | -1.800423036 | -        | Down |
| ENSOCUG00000004284 | 0.391441439 | -1.353131603 | C12orf29 | Down |
| ENSOCUG00000010580 | 0.310420088 | -1.687706175 | ELF1     | Down |
| ENSOCUG00000033220 | 0.148653055 | -2.749978982 | -        | Down |
| ENSOCUG00000016010 | 0.281084176 | -1.830925856 | LMBRD1   | Down |
| ENSOCUG00000021010 | 0.495656177 | -1.012588384 | -        | Down |
| ENSOCUG00000024997 | 0.494331136 | -1.016450316 | TUBB4A   | Down |
| ENSOCUG00000006338 | 0.028390074 | -5.138469582 | -        | Down |
| ENSOCUG00000011117 | 0.426166939 | -1.230509419 | -        | Down |
| ENSOCUG00000021362 | 0.24801433  | -2.011504616 | HAUS3    | Down |
| ENSOCUG00000012930 | 0.471971391 | -1.083228682 | PPP2R1B  | Down |
| ENSOCUG00000007174 | 0.393445238 | -1.345765247 | SATB1    | Down |
| ENSOCUG00000015229 | 0.164958125 | -2.599828257 | ATAD5    | Down |
| ENSOCUG00000012575 | 0.450560951 | -1.15020581  | PTAR1    | Down |
| ENSOCUG00000004221 | 0.097911384 | -3.352379574 | TYRP1    | Down |
| ENSOCUG00000029407 | 0.241139501 | -2.052060097 | -        | Down |
| ENSOCUG00000016515 | 0.240360583 | -2.056727771 | GJA9     | Down |
| ENSOCUG00000000462 | 0.285755431 | -1.807147177 | OXR1     | Down |
| ENSOCUG00000000516 | 0.494397712 | -1.016256028 | -        | Down |
| ENSOCUG00000004136 | 0.239650793 | -2.060994382 | -        | Down |
| ENSOCUG00000011906 | 0.486297846 | -1.040087895 | ALDH3A2  | Down |
| ENSOCUG00000016197 | 0.492589098 | -1.021543397 | RHBDL2   | Down |
| ENSOCUG00000011900 | 0.403132634 | -1.310673519 | ZNF420   | Down |
| ENSOCUG00000022126 | 0.156799879 | -2.673003648 | HMMR     | Down |
| ENSOCUG00000000422 | 0.327014086 | -1.612575313 | ZACN     | Down |
| ENSOCUG00000011295 | 0.487941911 | -1.035218687 | EVA1A    | Down |
| ENSOCUG00000003634 | 0.493344855 | -1.019331631 | PCBP1    | Down |
| ENSOCUG00000006282 | 0.191975206 | -2.381008098 | GCNT3    | Down |
| ENSOCUG00000022694 | 0.271606254 | -1.880411397 | -        | Down |
| ENSOCUG00000015263 | 0.486940601 | -1.038182298 | -        | Down |
| ENSOCUG00000000353 | 0.477575318 | -1.066199817 | MTX1     | Down |
| ENSOCUG00000016986 | 0.453259801 | -1.141589878 | -        | Down |
| ENSOCUG00000027918 | 0.182117367 | -2.45705959  | -        | Down |
| ENSOCUG00000001758 | 0.460781918 | -1.117843991 | PTPN2    | Down |
| ENSOCUG00000005048 | 0.488847951 | -1.03254229  | SEN2     | Down |
| ENSOCUG00000005741 | 0.485345883 | -1.042914842 | MARCHF6  | Down |
| ENSOCUG00000006428 | 0.20293698  | -2.300896314 | -        | Down |

|                     |             |              |          |      |
|---------------------|-------------|--------------|----------|------|
| ENSOCUG00000002847  | 0.223771219 | -2.159903605 | RLIM     | Down |
| ENSOCUG00000007235  | 0.403456497 | -1.309514974 | TRDMT1   | Down |
| ENSOCUG00000005009  | 0.137693606 | -2.860466522 | PLK4     | Down |
| ENSOCUG000000009575 | 0.49298038  | -1.020397865 | CIAO2A   | Down |
| ENSOCUG00000017522  | 0.372854421 | -1.423315647 | TGS1     | Down |
| ENSOCUG00000002694  | 0.445702327 | -1.165847602 | KPNA1    | Down |
| ENSOCUG00000017517  | 0.336521461 | -1.571229584 | TMEM68   | Down |
| ENSOCUG000000006900 | 0.481266333 | -1.055092592 | PIAS2    | Down |
| ENSOCUG00000013715  | 0.305595336 | -1.710305569 | C5orf34  | Down |
| ENSOCUG00000002192  | 0.135201875 | -2.886812933 | PGAP1    | Down |
| ENSOCUG00000022283  | 0.484252824 | -1.046167632 | DCUN1D3  | Down |
| ENSOCUG00000008509  | 0.367036708 | -1.446003739 | PAN3     | Down |
| ENSOCUG00000015473  | 0.483705745 | -1.047798423 | XKR6     | Down |
| ENSOCUG00000013330  | 0.411746068 | -1.28017322  | LARP1B   | Down |
| ENSOCUG00000006721  | 0.290204319 | -1.784859106 | USP33    | Down |
| ENSOCUG00000006277  | 0.480166894 | -1.058392156 | BNIP2    | Down |
| ENSOCUG00000009419  | 0.377354893 | -1.406006116 | APPBP2   | Down |
| ENSOCUG000000005763 | 0.420258137 | -1.250652341 | FAM177A1 | Down |
| ENSOCUG00000034962  | 0.321185366 | -1.638521933 | -        | Down |
| ENSOCUG00000024067  | 0.383579907 | -1.382400944 | -        | Down |
| ENSOCUG00000006426  | 0.495571662 | -1.012834402 | -        | Down |
| ENSOCUG00000012361  | 0.315348789 | -1.664979703 | ATF7IP   | Down |
| ENSOCUG00000012315  | 0.385691367 | -1.37448124  | RNF168   | Down |
| ENSOCUG00000012322  | 0.4972956   | -1.007824429 | MDF1     | Down |
| ENSOCUG00000005680  | 0.275180284 | -1.861550989 | -        | Down |
| ENSOCUG00000037401  | 0.189600204 | -2.398967581 | CNTD1    | Down |
| ENSOCUG00000009932  | 0.14771978  | -2.759065078 | ESCO2    | Down |
| ENSOCUG00000011400  | 0.421032471 | -1.247996593 | -        | Down |
| ENSOCUG00000008969  | 0.159993575 | -2.643914127 | TIE1     | Down |
| ENSOCUG00000007135  | 0           | -Inf         | FLACC1   | Down |
| ENSOCUG00000009999  | 0.497259672 | -1.007928661 | -        | Down |
| ENSOCUG00000026751  | 0.492047397 | -1.023130805 | PLBD1    | Down |
| ENSOCUG00000013493  | 0.486536332 | -1.039380554 | SLC7A1   | Down |
| ENSOCUG00000016756  | 0.141927802 | -2.816770874 | NEK1     | Down |
| ENSOCUG00000037473  | 0.120496722 | -3.052934192 | ZNF300   | Down |
| ENSOCUG00000008565  | 0.439883473 | -1.184806695 | PSMD1    | Down |
| ENSOCUG00000007198  | 0.253678662 | -1.978925923 | USP9X    | Down |
| ENSOCUG00000017459  | 0.120507471 | -3.052805506 | EPB42    | Down |
| ENSOCUG00000010612  | 0.49027307  | -1.028342576 | YTHDF2   | Down |
| ENSOCUG00000004759  | 0.494529635 | -1.015871117 | GSPT1    | Down |
| ENSOCUG00000014568  | 0.323739373 | -1.627095257 | MTMR2    | Down |
| ENSOCUG00000005030  | 0.306145064 | -1.707712671 | WASHC4   | Down |
| ENSOCUG00000013064  | 0.490152416 | -1.028697661 | TLN2     | Down |
| ENSOCUG00000022536  | 0.071563986 | -3.804622437 | SPP1     | Down |

|                    |             |              |           |      |
|--------------------|-------------|--------------|-----------|------|
| ENSOCUG00000011896 | 0.328147144 | -1.60758522  | FBXL3     | Down |
| ENSOCUG00000015158 | 0.458827775 | -1.123975366 | COG6      | Down |
| ENSOCUG00000007351 | 0.123215613 | -3.020743015 | SCML2     | Down |
| ENSOCUG00000002137 | 0.351671454 | -1.507699862 | -         | Down |
| ENSOCUG00000005016 | 0.426732477 | -1.228596182 | NT5C3A    | Down |
| ENSOCUG00000014811 | 0.177870133 | -2.491103814 | KIAA1109  | Down |
| ENSOCUG00000026731 | 0.182010468 | -2.457906665 | HELLS     | Down |
| ENSOCUG00000012469 | 0.366614337 | -1.447664888 | DYNLT4    | Down |
| ENSOCUG00000016413 | 0.235063241 | -2.088879147 | CLTC      | Down |
| ENSOCUG00000001881 | 0.441152702 | -1.180649975 | ING3      | Down |
| ENSOCUG00000016878 | 0.13038911  | -2.939104715 | BRCA2     | Down |
| ENSOCUG00000024179 | 0.46715202  | -1.098035988 | -         | Down |
| ENSOCUG00000004220 | 0.477817062 | -1.065469726 | ERP44     | Down |
| ENSOCUG00000012505 | 0.34270386  | -1.544965655 | LIPM      | Down |
| ENSOCUG00000005559 | 0.179690306 | -2.476415514 | TBC1D9    | Down |
| ENSOCUG00000022350 | 0.486157227 | -1.040505128 | CLOCK     | Down |
| ENSOCUG00000004996 | 0.489272162 | -1.031290894 | EIF3A     | Down |
| ENSOCUG00000010815 | 0.283234022 | -1.819933522 | CDC27     | Down |
| ENSOCUG00000003868 | 0.481486549 | -1.0544326   | SLC38A7   | Down |
| ENSOCUG00000013853 | 0.495152544 | -1.014055043 | NCBP1     | Down |
| ENSOCUG00000011824 | 0.492389851 | -1.022127069 | RIOK1     | Down |
| ENSOCUG00000032312 | 0.3214841   | -1.637180709 | -         | Down |
| ENSOCUG00000025395 | 0.461343611 | -1.116086416 | -         | Down |
| ENSOCUG00000012301 | 0.479027197 | -1.061820527 | -         | Down |
| ENSOCUG00000006616 | 0.492420467 | -1.022037368 | EFCAB14   | Down |
| ENSOCUG00000016788 | 0.45748584  | -1.128201005 | FAM114A2  | Down |
| ENSOCUG00000022888 | 0.32840158  | -1.606467028 | -         | Down |
| ENSOCUG00000010661 | 0.474513739 | -1.075478235 | PPIL3     | Down |
| ENSOCUG00000000194 | 0.466765029 | -1.099231618 | EGR3      | Down |
| ENSOCUG00000012495 | 0.054133269 | -4.207340672 | LIPN      | Down |
| ENSOCUG00000017307 | 0.236071552 | -2.082703898 | -         | Down |
| ENSOCUG00000002084 | 0.268293189 | -1.898117663 | UFL1      | Down |
| ENSOCUG00000010286 | 0.410979313 | -1.282862317 | DOCK3     | Down |
| ENSOCUG00000014366 | 0.216927036 | -2.204718225 | UGCG      | Down |
| ENSOCUG00000002718 | 0.307735936 | -1.70023517  | -         | Down |
| ENSOCUG00000007601 | 0.279024822 | -1.841534626 | MBNL1     | Down |
| ENSOCUG00000021559 | 0.479592949 | -1.060117648 | ACER3     | Down |
| ENSOCUG00000017633 | 0.350680356 | -1.511771478 | -         | Down |
| ENSOCUG00000013020 | 0.353078006 | -1.50194114  | ADGRF4    | Down |
| ENSOCUG00000022333 | 0.304878317 | -1.713694546 | -         | Down |
| ENSOCUG00000021618 | 0.018988085 | -5.718761804 | SERPINB12 | Down |
| ENSOCUG00000029442 | 0.44331034  | -1.173611082 | STYX      | Down |
| ENSOCUG00000022702 | 0.326344537 | -1.615532205 | -         | Down |
| ENSOCUG00000003204 | 0.493769944 | -1.018089075 | MAP3K9    | Down |

|                     |             |              |         |      |
|---------------------|-------------|--------------|---------|------|
| ENSOCUG00000003228  | 0.393968222 | -1.343848831 | CLK4    | Down |
| ENSOCUG00000007696  | 0.425908952 | -1.231383041 | -       | Down |
| ENSOCUG000000015970 | 0.215863623 | -2.211807953 | DENND1B | Down |
| ENSOCUG000000003465 | 0.441188386 | -1.180533283 | PLPP6   | Down |
| ENSOCUG000000023139 | 0.471494166 | -1.084688175 | -       | Down |
| ENSOCUG000000006039 | 0.176263779 | -2.504192056 | -       | Down |
| ENSOCUG000000016098 | 0.379118529 | -1.399279127 | FGFBP1  | Down |
| ENSOCUG000000017070 | 0.232725994 | -2.103295736 | P2RY4   | Down |
| ENSOCUG000000027632 | 0.425389386 | -1.23314406  | -       | Down |
| ENSOCUG00000000707  | 0.418474848 | -1.256787183 | -       | Down |
| ENSOCUG000000027424 | 0.374055653 | -1.41867516  | PRPF38B | Down |
| ENSOCUG000000006624 | 0.264155435 | -1.920541002 | PDS5B   | Down |
| ENSOCUG000000016615 | 0.279179452 | -1.840735332 | SMG1    | Down |
| ENSOCUG000000029392 | 0.476471034 | -1.069539582 | -       | Down |
| ENSOCUG000000013099 | 0.412148951 | -1.278762271 | SLC35F5 | Down |
| ENSOCUG00000000649  | 0.297048049 | -1.75123178  | SLC36A4 | Down |
| ENSOCUG000000014679 | 0.405620041 | -1.301799158 | FNDC3A  | Down |
| ENSOCUG000000007566 | 0.174472619 | -2.51892745  | ACTA1   | Down |
| ENSOCUG000000000486 | 0.473748728 | -1.077806026 | SPATA5  | Down |
| ENSOCUG000000014903 | 0.318906964 | -1.648792493 | -       | Down |
| ENSOCUG000000017023 | 0.491855031 | -1.023694936 | ATF1    | Down |
| ENSOCUG000000009417 | 0.174374125 | -2.519742114 | PDE5A   | Down |
| ENSOCUG000000030837 | 0.271036766 | -1.883439529 | -       | Down |
| ENSOCUG000000004750 | 0.415765192 | -1.266159113 | GRHL2   | Down |
| ENSOCUG000000002334 | 0.363585014 | -1.459635359 | -       | Down |
| ENSOCUG000000013069 | 0.377033485 | -1.407235437 | ELOVL6  | Down |
| ENSOCUG000000002603 | 0.477446939 | -1.066587687 | QTRT2   | Down |
| ENSOCUG000000006698 | 0.217401902 | -2.20156353  | TNF     | Down |
| ENSOCUG000000000575 | 0.489696688 | -1.030039655 | -       | Down |
| ENSOCUG000000007335 | 0           | -Inf         | HS3ST2  | Down |
| ENSOCUG000000009935 | 0.243348832 | -2.038902244 | NBN     | Down |
| ENSOCUG000000013902 | 0           | -Inf         | SPACA4  | Down |
| ENSOCUG000000011293 | 0.434340651 | -1.203101112 | YME1L1  | Down |
| ENSOCUG000000015423 | 0.111558625 | -3.164126042 | ZDHHC23 | Down |
| ENSOCUG000000000481 | 0.477268615 | -1.067126628 | EIF2S2  | Down |
| ENSOCUG000000009927 | 0.297123408 | -1.750865826 | HERC4   | Down |
| ENSOCUG000000014232 | 0.427847315 | -1.224832059 | CLINT1  | Down |
| ENSOCUG000000009180 | 0.213191553 | -2.229777815 | FZD6    | Down |
| ENSOCUG000000003910 | 0.478181157 | -1.064370813 | ZNHIT6  | Down |
| ENSOCUG000000007398 | 0.491938118 | -1.023451248 | DR1     | Down |
| ENSOCUG000000004242 | 0.489637533 | -1.030213943 | TEX10   | Down |
| ENSOCUG000000001152 | 0.49510409  | -1.014196227 | LAMTOR3 | Down |
| ENSOCUG000000011143 | 0.492243377 | -1.0225563   | FOSL1   | Down |
| ENSOCUG000000012407 | 0.480240201 | -1.058171917 | MID2    | Down |

|                     |             |              |         |      |
|---------------------|-------------|--------------|---------|------|
| ENSOCUG00000023746  | 0.233899331 | -2.096040363 | -       | Down |
| ENSOCUG00000039186  | 0.298475509 | -1.744315535 | -       | Down |
| ENSOCUG00000000370  | 0.234593582 | -2.091764549 | ADAMTS8 | Down |
| ENSOCUG000000008388 | 0.399723288 | -1.322926467 | CCNG2   | Down |
| ENSOCUG00000000286  | 0.348405595 | -1.521160303 | EFCAB7  | Down |
| ENSOCUG00000004696  | 0.247516723 | -2.014402096 | -       | Down |
| ENSOCUG00000009154  | 0.35424282  | -1.497189483 | -       | Down |
| ENSOCUG00000009347  | 0           | -Inf         | SSTR2   | Down |
| ENSOCUG00000000625  | 0.200920262 | -2.315305037 | VPS50   | Down |
| ENSOCUG00000010513  | 0.171007228 | -2.547870789 | CEP55   | Down |

**Table S2. Data filtering statistics**

| Sample    | Clean Reads No. | Clean Data (bp) | Clean Reads % | Clean Data % |
|-----------|-----------------|-----------------|---------------|--------------|
| Control_1 | 48450006        | 7315950906      | 95.46         | 95.46        |
| Control_2 | 43679334        | 6595579434      | 95.1          | 95.1         |
| Control_3 | 49556618        | 7483049318      | 95.16         | 95.16        |
| Exos_1    | 43524030        | 6572128530      | 95.45         | 95.45        |
| Exos_2    | 45633074        | 6890594174      | 95.38         | 95.38        |
| Exos_3    | 52977250        | 7999564750      | 95.55         | 95.55        |

Note:

Clean Reads No: The number of high-quality sequence reads;

Clean Data (bp): the number of high-quality sequence bases;

Clean Reads %: The percentage of high-quality sequence reads in sequencing reads;

Clean Data %: The percentage of high-quality sequence bases to sequenced bases.

**Table S3. RNASeq Map Statistics.**

| Sample    | Clean_Reads | Total_Mapped      | Multiple_Mapped | Uniquely_Mapped   |
|-----------|-------------|-------------------|-----------------|-------------------|
| Control_1 | 48450006    | 42153959 (87.01%) | 2242156 (5.32%) | 39911803 (94.68%) |
| Control_2 | 43679334    | 39425995 (90.26%) | 2142961 (5.44%) | 37283034 (94.56%) |
| Control_3 | 49556618    | 44534361 (89.87%) | 2792734 (6.27%) | 41741627 (93.73%) |
| Exos_1    | 43524030    | 37950001 (87.19%) | 1817977 (4.79%) | 36132024 (95.21%) |
| Exos_2    | 45633074    | 39979433 (87.61%) | 1892914 (4.73%) | 38086519 (95.27%) |
| Exos_3    | 52977250    | 45766728 (86.39%) | 2058756 (4.50%) | 43707972 (95.50%) |

Note:

Clean Reads: The total number of sequences used for alignment;

Total Mapped: The total number of sequences in the reference genome in the alignment, the percentage is Total Mapped / Clean Reads;

Multiple Mapped: The total number of sequences aligned to multiple positions, the percentage is Multiple Mapped / Total Mapped;

Uniquely Mapped: The total number of sequences aligned to only one position, the percentage is Uniquely Mapped / Total Mapped.

**Table S4. Information of primers used for qRT-PCR.**

| Primer | Sequence (5'→3') |
|--------|------------------|
|--------|------------------|

|               |                                                           |
|---------------|-----------------------------------------------------------|
| <i>BMP4</i>   | F: TGTCAACTCCAGCATCCCCAA<br>R: ACCCACACCCCTCTACTACCAT     |
| <i>LEF1</i>   | F: CATCTCGGGTGGATTTCAGG<br>R: AAACCTCCCGTGACACCATCC       |
| <i>IGF1R</i>  | F: ACGAGTGGAGAAATCTGCGG<br>R: GTAGTTGCGGTAGTCCTCGG        |
| <i>TGFβ3</i>  | F: TCTCTGTCCACTTGCAACCAC<br>R: CCGACTCGGTGTTTTCTGA        |
| <i>TGFα</i>   | F: ACGTGTGTGCTGATACTGCT<br>R: AAGGCCTTTCTTCTGCAAGC        |
| <i>FGFR1</i>  | F: TAGCGAGTTTATTCCTGGCTCT<br>R: CTCAGGCTGGAACCTCTCGAA     |
| <i>FOSL1</i>  | F: GCCCAGCGAACAGATCAGCC<br>R: TCGTCCCTCCAGCTTGTCCGTCT     |
| <i>KRT17</i>  | F: AGCTGCTACAGCTTCGGCTCG<br>R: CAGGCGGTTCGTTGAGGTTCT      |
| <i>BCL2</i>   | F: ACATCGCCCTGTGGATGACTG<br>R: CGAGGGTGATGCAAGCTCCTAT     |
| <i>BMP2</i>   | F: GACTTCAACAGTGCCACC<br>R: TGCTGTAGCCAAATTCGT            |
| <i>CCND1</i>  | F: GAACGCTACCTTCCCCAGTGCTC<br>R: CCTCACAGACCTCCAGCATCCAG  |
| <i>CTNNB1</i> | F: ACATTCTCACAGAGCCCGACCC<br>R: AGCAATCACACTCTGCATAGCGTTC |
| <i>EGF</i>    | F: GTGCGATGCCGAGAAGT<br>R: AGCCCAATCTGAGAACCAC            |
| <i>GAPDH</i>  | F: CACCAGGGCTGCTTTTAACTCT<br>R: CTTCCCGTTCTCAGCCTTGACC    |

**Table S5. Information of primers used for qRT-PCR.**

| Primer              | Sequence (5'→3')                                                 |
|---------------------|------------------------------------------------------------------|
| <i>pcDNA3.1-LEF</i> | F: tagtccagtgtggtggaattcATGCCCCAGCTCTCCGGG                       |
| <i>1</i>            | R: gggttaaaggccctctagaTCAGATGTAGGCAGCTGTCATTCT                   |
| <i>siRNA-1915</i>   | sense: GCAUCCCUCAUCCAGCUAUTT<br>antisense: AUAGCUGGAUGAGGGAUGCTT |
| <i>siRNA-2088</i>   | sense: GCAAAUGUCGUAGCUGAGUTT<br>antisense: ACUCAGCUACGACAUUUGCTT |
| <i>siRNA-2216</i>   | sense: GCUACAUAUGCAGCUUUAUTT<br>antisense: AUAAAGCUGCAUAUGUAGCTT |
| <i>siRNA-NC</i>     | sense: GTGCGATGCCGAGAAGT<br>antisense: AGCCCAATCTGAGAACCAC       |
